# Supplementary material for: Mutation characteristics of cancer susceptibility genes in Chinese ovarian cancer patients
Source: Frontiers journal article supplement (doi:10.3389/fonc.2024.1395818), 2024-05-16

Figure S3. Mutations spectrum of genes with high-frequency deleterious mutation

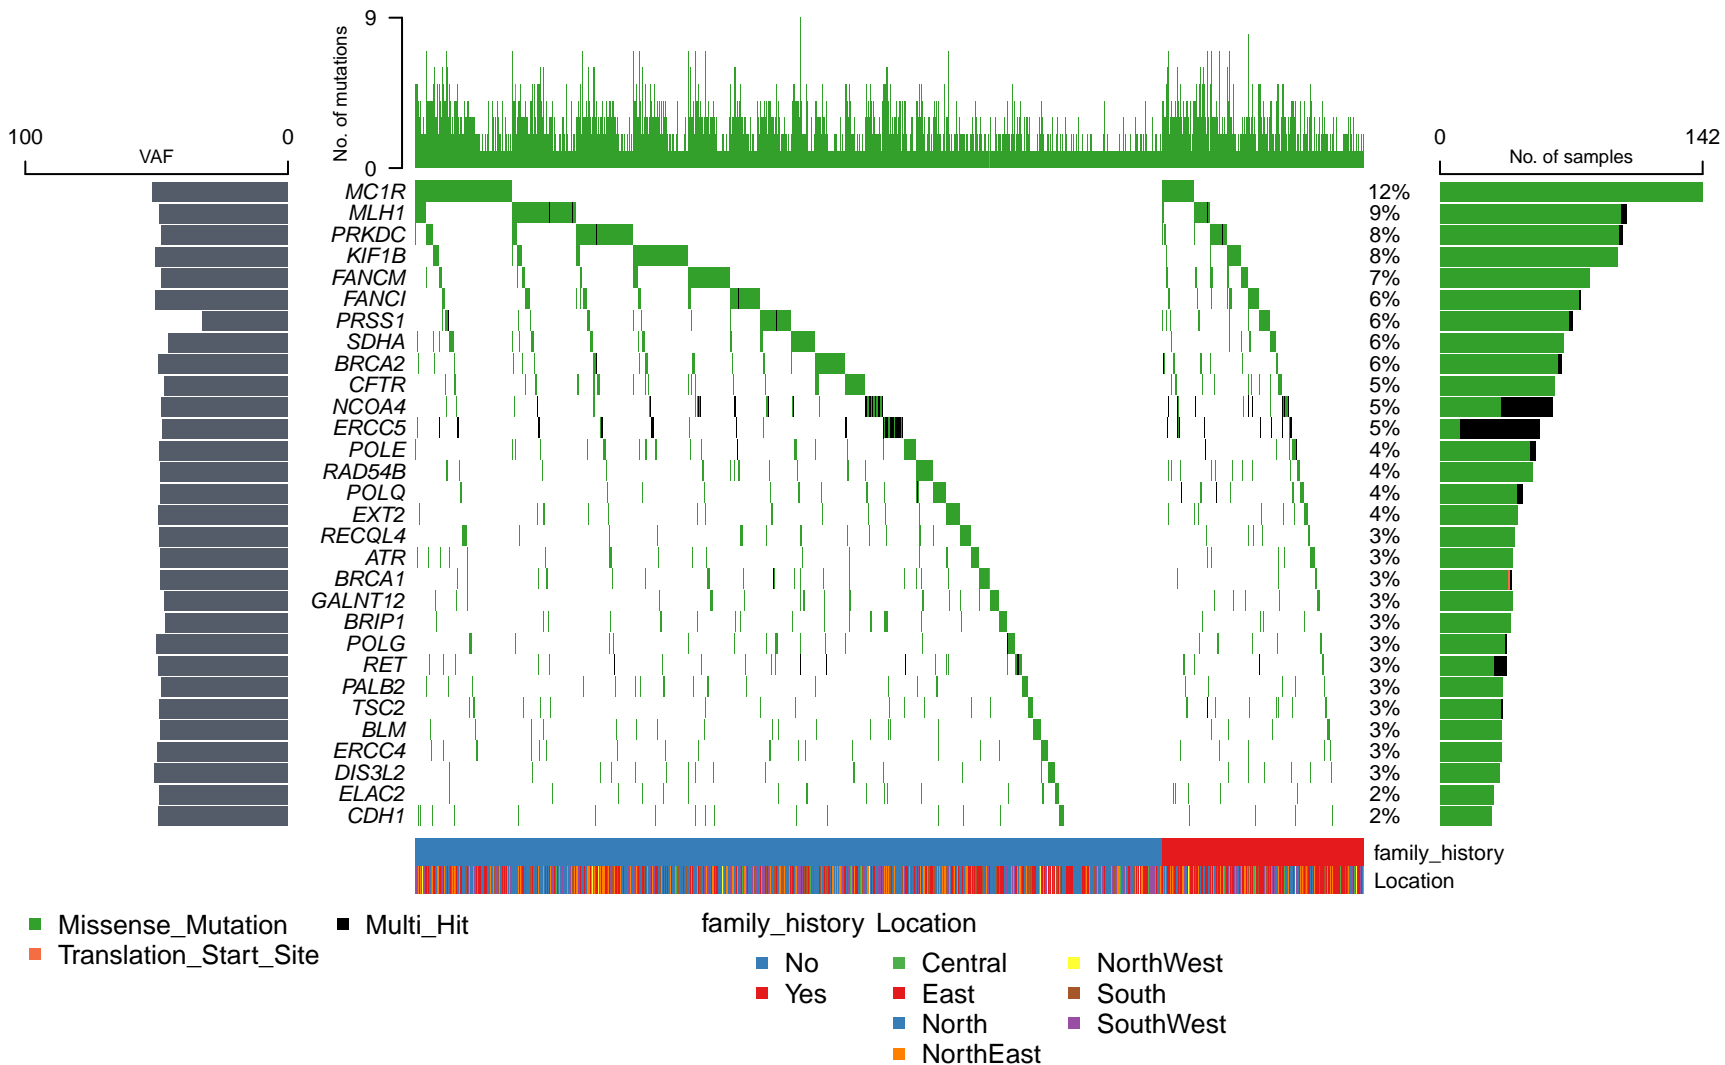

Supplement: Image_3.PDF [file Image_3.PDF]
