# Supplementary material for: Mutation characteristics of cancer susceptibility genes in Chinese ovarian cancer patients
Source: Frontiers journal article supplement (doi:10.3389/fonc.2024.1395818), 2024-05-16

Figure S5. Comparison of BRCA1 and BRCA2 high-frequency mutations in the enrollment cohort and the detection frequency of GnomAD database

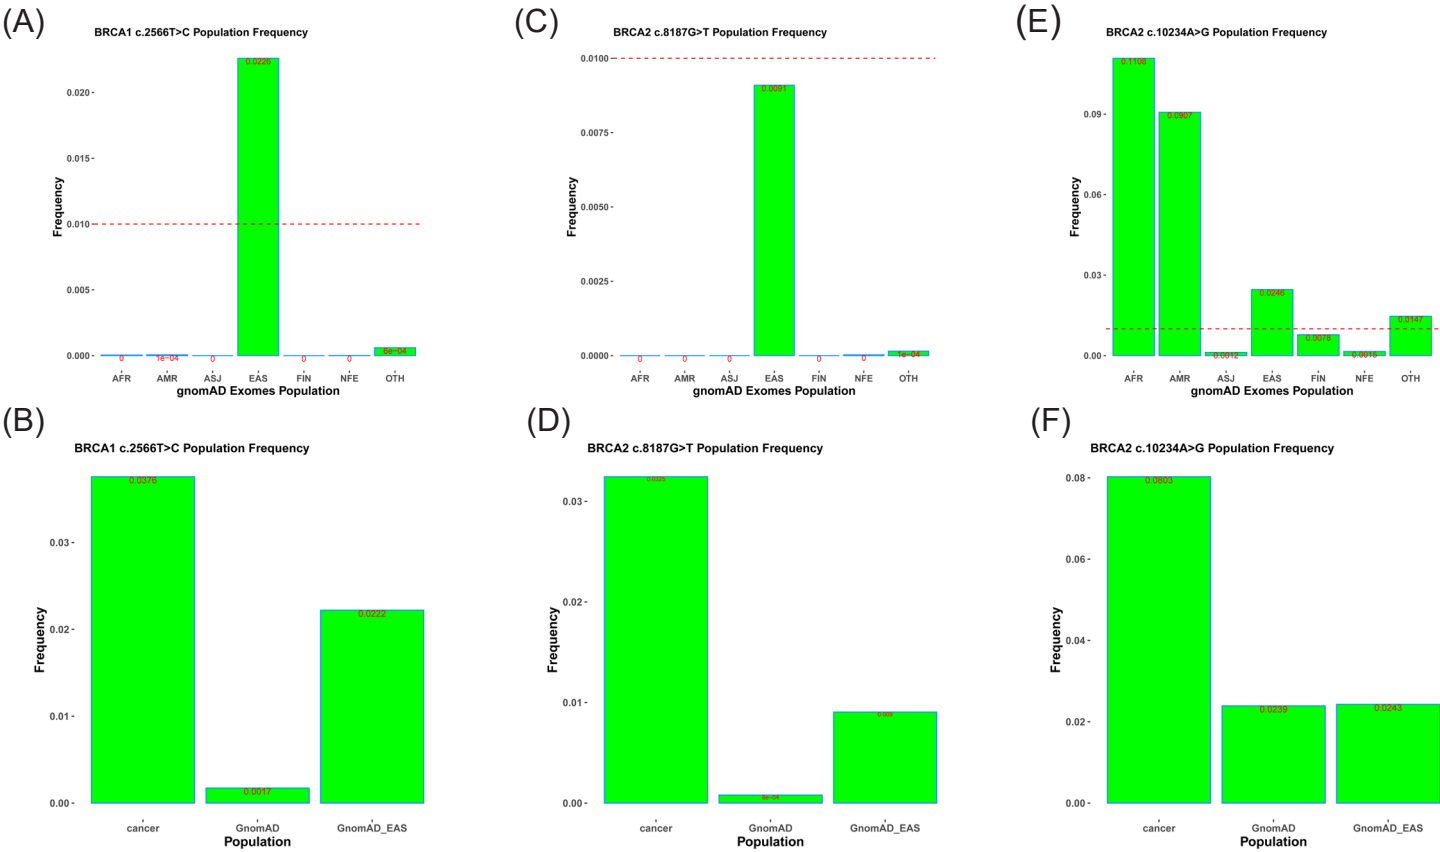

Supplement: Image_5.PDF [file Image_5.PDF]
