# Supplementary material for: Mutation characteristics of cancer susceptibility genes in Chinese ovarian cancer patients
Source: Frontiers journal article supplement (doi:10.3389/fonc.2024.1395818), 2024-05-16

Figure S6. Differences in age distribution between BRCA1 and BRCA2 co-mutation group and other patients

Group  Other  Co-mutation

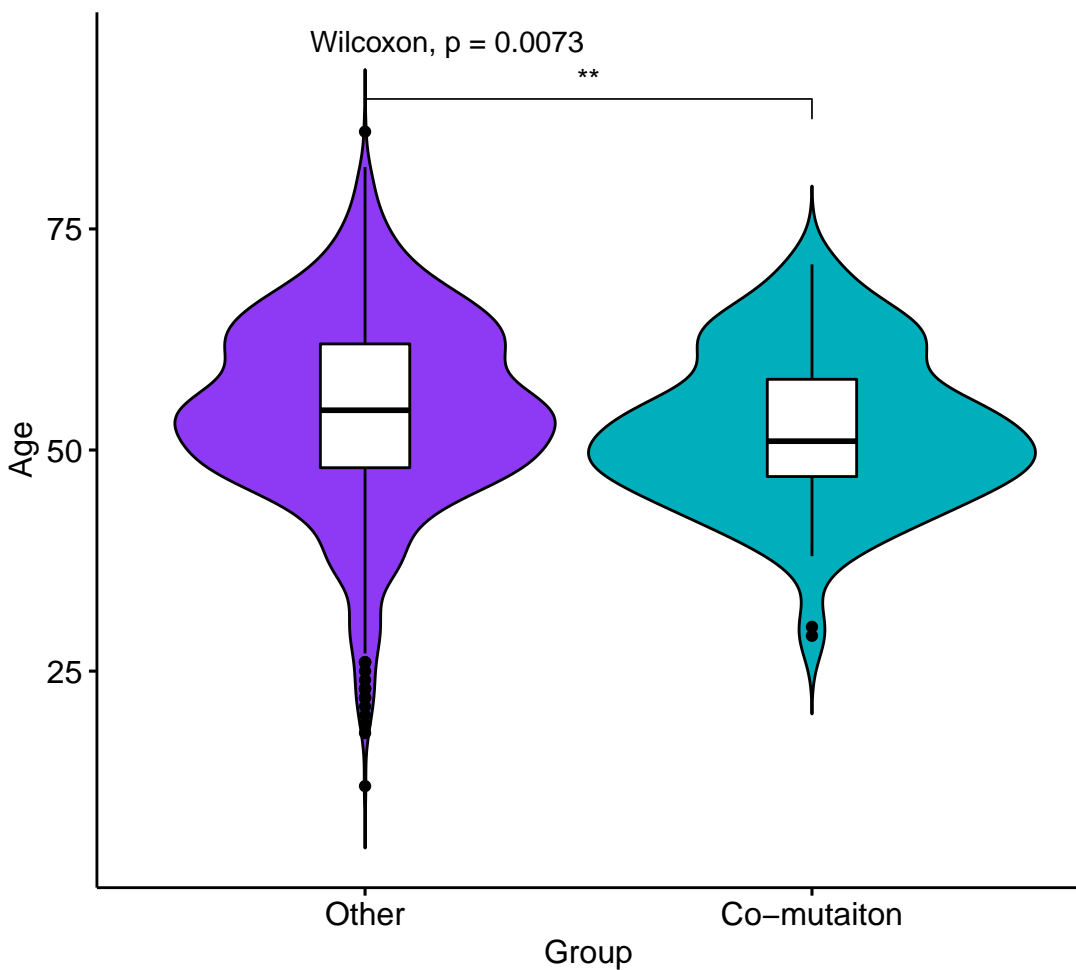

Supplement: Image_6.PDF [file Image_6.PDF]
