# Supplementary material for: Mutation characteristics of cancer susceptibility genes in Chinese ovarian cancer patients
Source: Frontiers journal article supplement (doi:10.3389/fonc.2024.1395818), 2024-05-16

The Chinese ovarian cancer population had characteristic high-frequency mutated genes and hotspots

|          |          |          |            |        |
|----------|----------|----------|------------|--------|
| 0.57     | 0.64     | 0.45     | 1.71       | ATM    |
| 9.50     | 8.70     | 17.59    | 3.42       | BRCA1  |
| 5.12     | 5.80     | 5.57     | 5.81       | BRCA2  |
| 1.36     | 0.92     | 0.67     | 3.25       | BRIP1  |
| 0.00     | 0.10     | 0.00     | 0.00       | EPCAM  |
| 0.05     | 0.10     | 0.00     | 8.88       | MLH1   |
| 0.00     | 0.79     | 0.45     | 1.02       | MSH2   |
| 0.16     | 0.40     | 0.00     | 0.68       | MSH6   |
| 0.21     | 0.30     | 0.00     | 1.11       | PMS2   |
| 0.57     | 0.58     | 0.00     | 0.43       | RAD51C |
| 0.57     | 0.48     | 2.45     | 2.05       | RAD51D |
| 0.00     | 0.00     | 0.00     | 0.00       | STK11  |
| Cohort A | Cohort B | Cohort C | Our Cohort |        |

(A)

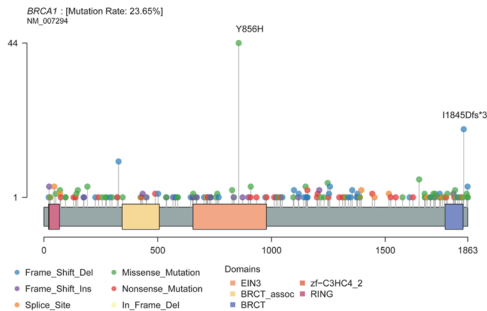

(B)

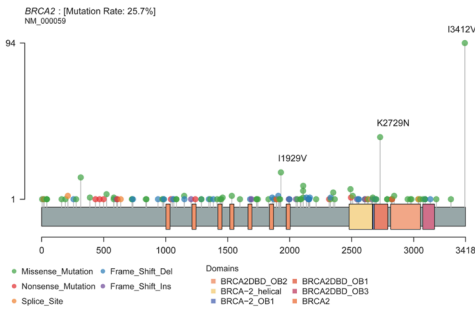

(C)

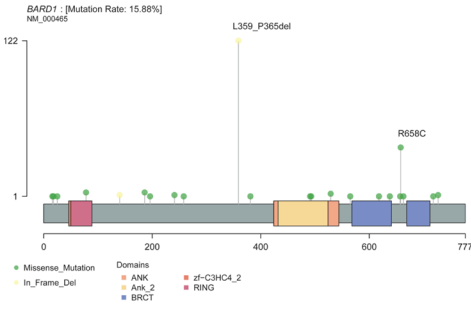

(D)

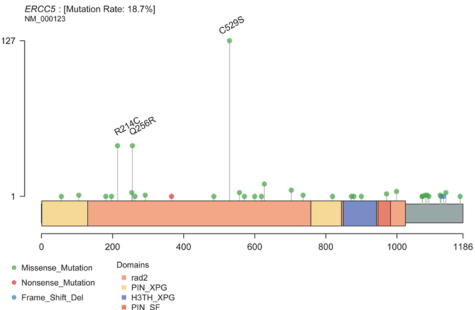

(E)

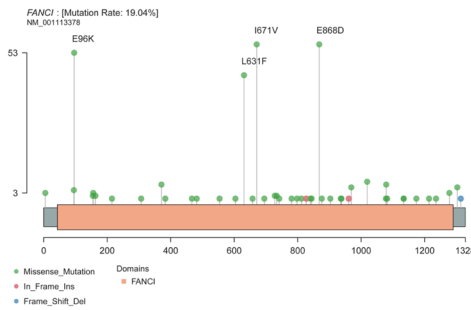

(F)

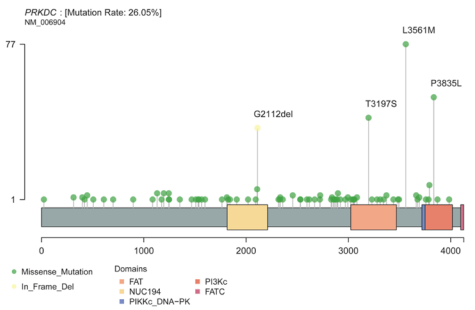

Supplement: Image_10.PDF [file Image_10.PDF]
