# Supplementary material for: Mutation characteristics of cancer susceptibility genes in Chinese ovarian cancer patients
Source: Front Oncol. 2024 May 16;14:1395818. doi: 10.3389/fonc.2024.1395818 (PMC11137316; doi:10.3389/fonc.2024.1395818)
Supplement: Supplementary file 6 [file Table_1.xlsx]

## Sheet: Sheet1
Table S1 The list of 171 genes
Gene Symbol
ACVRL1
AKT1
ALK
APC
AR
ATM
ATR
ATRX
AXIN2
BAP1
BARD1
BLM
BMPR1A
BRCA1
BRCA2
BRIP1
BUB1
BUB1B
CDC73
CDH1
CDK12
CDK4
CDK6
CDKN1B
CDKN1C
CDKN2A
CEP57
CFTR
CHEK1
CHEK2
CTNNB1
CYLD
DDB2
DICER1
DIRC2
DIS3L2
DMC1
EGFR
ELAC2
EME1
EME2
EMSY
ENG
EPAS1
EPCAM
ERCC2
ERCC3
ERCC4
ERCC5
EXT1
EXT2
EZH2
FAM175A
FANCA
FANCC
FANCD2
FANCE
FANCF
FANCG
FANCI
FANCL
FANCM
FH
FLCN
GALNT12
GEN1
GPC3
GREM1
HMMR
HNF1A
HNF1B
HOXB13
HRAS
KIF1B
KIT
KLLN
MAX
MC1R
MDH2
MEN1
MET
MITF
MLH1
MLH3
MRE11A
MSH2
MSH3
MSH6
MSR1
MUS81
MUTYH
MXI1
NBN
NCOA4
NF1
NF2
NQO2
NTHL1
NTRK1
PALB2
PALLD
PDGFRA
PHB
PHOX2B
PMS1
PMS2
POLB
POLD1
POLE
POLG
POLH
POLN
POLQ
POT1
PPM1D
PPP2R2A
PRKDC
PRSS1
PTCH1
PTCH2
PTEN
RAD50
RAD51
RAD51B
RAD51C
RAD51D
RAD52
RAD54B
RAD54L
RB1
RBBP8
RECQL4
RET
REV3L
RHBDF2
RNASEL
RPA1
RPS20
SDHA
SDHAF2
SDHB
SDHC
SDHD
SHFM1
SLX1A
SLX1B
SLX4
SMAD4
SMARCA4
SMARCB1
SMARCE1
SPINK1
SPRED1
STK11
SUFU
TERT
TMEM127
TP53
TP53BP1
TRIM24
TRIM33
TSC1
TSC2
TSHR
VHL
WRN
WT1
XPA
XPC
XRCC2
XRCC3
