# Supplementary material for: Mutation characteristics of cancer susceptibility genes in Chinese ovarian cancer patients
Source: Front Oncol. 2024 May 16;14:1395818. doi: 10.3389/fonc.2024.1395818 (PMC11137316; doi:10.3389/fonc.2024.1395818)
Supplement: Supplementary file 7 [file Table_2.xlsx]

## Sheet: Sheet1
Table S2 Quality control information of the samples
Sample ID	Average Depth	Capture Effiency (%)	Coverage 1X (%)	Coverage 30X (%)	GC (%)	Q20 (%)	Q30 (%)
Sample1	256.77	41.02	100	99.87	46.22	97.55	90.74
Sample2	270.39	38.84	99.99	99.75	45.05	97.44	90.38
Sample3	236.01	38.94	100	99.76	46.09	97.41	90.24
Sample4	284.01	39.04	100	99.82	46.03	97.33	89.97
Sample5	411.42	39.8	100	99.89	46.38	97.47	90.47
Sample6	311.05	45.4	100	99.93	47.34	97.66	90.74
Sample7	680.95	47.23	99.99	99.64	48.23	97.24	90.42
Sample8	345.89	40.77	99.91	97.42	48.61	97.15	90.38
Sample9	758.6	44.24	99.99	99.71	49.34	96.46	88.51
Sample10	577.27	43.64	99.99	99.38	48.36	96.7	89.14
Sample11	308.94	46.26	99.95	98.49	49.74	96.86	89.31
Sample12	116.51	44.72	99.63	96.15	50.89	96.95	89.98
Sample13	363.43	35.08	100	99.95	46.47	97.27	88.49
Sample14	476.09	44.41	100	99.95	48.18	98.02	91.34
Sample15	399.34	37.2	99.97	98.63	49.78	96.89	89.56
Sample16	185.12	35.67	99.99	99.83	46.16	97.84	90.45
Sample17	589.14	41.4	99.98	99.28	49.99	97.08	89.86
Sample18	670.82	46.53	100	99.88	45.98	97.62	90.62
Sample19	364.09	49.7	100	99.58	46.66	97.57	90.52
Sample20	378.15	49.89	100	99.73	46.95	97.68	90.73
Sample21	656.33	51.92	99.99	99.89	47.3	97.61	90.58
Sample22	601.38	53.4	100	99.88	47.43	97.69	90.9
Sample23	674.34	53.27	100	99.89	47	97.59	90.44
Sample24	787.73	53.06	100	99.89	47.18	97.61	90.57
Sample25	714.14	53.53	100	99.87	46.87	97.49	90.24
Sample26	835.8	45.83	100	99.9	46.47	97.42	90.07
Sample27	608.86	51.14	100	99.84	47	97.42	90.06
Sample28	499.9	39.4	99.99	99.81	45.22	97.84	91.28
Sample29	764.23	52.67	100	99.9	47.22	97.54	90.48
Sample30	559.48	48.43	99.99	99.8	46.84	97.48	90.33
Sample31	537.7	36.81	100	99.83	45	97.65	90.72
Sample32	815.94	51.59	100	99.91	46.93	97.62	90.69
Sample33	513.81	51.22	100	99.78	47.27	97.71	90.87
Sample34	611.18	26.24	100	99.8	43.94	97.8	91.13
Sample35	787.3	52.07	99.99	99.88	47.37	97.85	91.58
Sample36	639.63	52.17	100	99.83	46.89	97.97	91.85
Sample37	500.71	50.19	99.99	99.76	46.51	97.88	91.59
Sample38	481.66	53.15	99.99	99.78	47.14	97.84	91.34
Sample39	706.94	55.11	100	99.86	47.52	97.81	91.4
Sample40	718.1	42.32	100	99.88	45.92	97.81	91.3
Sample41	704.73	50.67	99.99	99.84	46.94	97.91	91.74
Sample42	448.03	53.01	99.99	99.69	47.14	97.87	91.56
Sample43	604.56	45.47	99.99	99.84	46.09	97.91	91.66
Sample44	583.79	51.17	99.99	99.82	46.73	97.88	91.57
Sample45	737.42	52.72	100	99.89	47.13	98.03	92.16
Sample46	740.65	49.61	100	99.89	47.2	97.74	91.12
Sample47	669.23	37.38	100	99.8	44.97	97.94	91.69
Sample48	690.99	54.54	100	99.8	46.94	97.95	91.78
Sample49	821.01	52.91	99.99	99.85	47.21	97.82	91.38
Sample50	629.79	52.85	100	99.82	47.21	97.76	91.24
Sample51	655.81	51.3	100	99.85	46.92	97.97	91.85
Sample52	748.97	54.65	100	99.89	47.34	97.82	91.47
Sample53	574.01	51.64	99.99	99.81	47.29	97.71	91.12
Sample54	603.85	47.81	99.99	99.84	46.15	97.92	91.67
Sample55	505.39	50.11	99.99	99.78	46.59	97.73	91.1
Sample56	734.78	53.32	100	99.9	47.11	97.83	91.42
Sample57	770.18	52.64	99.99	99.87	47	97.79	91.28
Sample58	848.25	38.72	100	99.96	47.76	97.5	90.16
Sample59	1081.58	27.02	100	99.98	45.89	97.81	91.16
Sample60	676.1	37.59	100	99.95	47.06	97.41	91.18
Sample61	804.62	38.34	100	99.96	47.77	97.63	90.78
Sample62	613.41	22.48	100	99.92	47.92	96.2	88.23
Sample63	305.16	37.31	100	99.78	48.35	98.01	91.99
Sample64	548.5	35.3	100	99.93	47.32	97.72	90.9
Sample65	785.71	37.82	100	99.94	46.87	98.03	91.79
Sample66	255.6	36.82	100	99.97	46.19	96.42	88.29
Sample67	502.1	36.39	100	99.96	46.23	96.44	88.31
Sample68	300.54	36.37	100	99.96	46.55	96.54	88.67
Sample69	261.59	35.78	100	99.96	46.38	96.49	88.49
Sample70	198.06	38.39	100	99.93	46.66	97.72	90.97
Sample71	296.36	34.48	100	99.95	46.23	96.53	88.57
Sample72	414.7	37.82	100	99.89	45.4	97.93	91.71
Sample73	349.01	33.74	100	99.91	44.9	97.9	91.58
Sample74	521.48	16.23	100	99.91	42.86	97.2	90.02
Sample75	437.31	24.62	100	99.94	44.16	96.45	87.99
Sample76	438.79	36.03	100	99.95	45.91	96.01	86.81
Sample77	727.45	42.48	100	99.95	46.24	97.73	91.08
Sample78	690.59	38.71	100	99.93	46.07	97.5	90.4
Sample79	167.41	42.64	100	99.34	46.24	97.42	90.75
Sample80	846.99	42.98	100	99.98	46.59	97.4	90.1
Sample81	393.85	36.1	100	99.93	47.03	97.48	90.11
Sample82	588.06	42.43	100	99.92	45.94	97.75	91.12
Sample83	464.22	40.23	100	99.94	46.2	97.64	90.8
Sample84	414.78	42.4	100	99.92	46.19	97.53	90.47
Sample85	637.82	23.79	100	99.95	44.13	97.88	91.55
Sample86	331.99	13.77	100	99.88	41.61	97.44	90.14
Sample87	364.17	40.24	100	99.91	46.05	96.71	88.36
Sample88	378.01	45.06	100	99.89	45.43	97.7	90.6
Sample89	343.62	45.21	100	99.89	45.19	97.39	89.86
Sample90	432.99	44.98	100	99.94	45.8	97.45	89.94
Sample91	351.79	45.11	100	99.89	45.56	97.35	89.72
Sample92	341.3	44.38	100	99.84	44.92	97.43	89.84
Sample93	451.28	45.71	100	99.92	45.51	96.7	87.92
Sample94	307.92	36.59	100	99.9	46.12	97.44	90.44
Sample95	177.63	31.52	100	99.87	44.97	96.91	89.74
Sample96	326.78	36.07	100	99.92	45.23	96.66	89.18
Sample97	300.55	37.63	100	99.95	46.24	97.82	91.24
Sample98	321.08	31.82	100	99.89	44.97	97.65	90.58
Sample99	289.78	49.02	100	99.97	45.49	96.65	88.66
Sample100	506.11	47.76	100	99.97	46.52	95.74	85.94
Sample101	436.94	35.21	100	99.95	45.22	97.31	89.94
Sample102	225.69	27.61	100	99.88	44.06	97.56	90.21
Sample103	535.53	35.96	99.99	99.91	44.8	96.9	88.53
Sample104	826.3	33.36	100	99.96	46.08	98.15	92.15
Sample105	316.23	33.05	100	99.89	45.38	97.97	91.81
Sample106	622.31	42.95	100	99.96	46.47	96.7	89.01
Sample107	229.82	36.55	100	99.87	47.83	96.47	87.7
Sample108	214.8	26.77	100	99.87	46.59	96.55	87.86
Sample109	314.5	24.01	100	99.89	45.26	96.32	87.17
Sample110	616.27	43.56	100	99.88	47.66	94.91	83.99
Sample111	253.59	35.52	100	99.91	46.2	98	91.98
Sample112	373.1	38.29	100	99.93	46.98	97.8	91.01
Sample113	224.56	39.21	100	99.93	46.04	98	91.82
Sample114	335.17	20.4	100	99.91	43.95	98.16	92.41
Sample115	268.97	30.16	100	99.88	45	98.04	92.02
Sample116	338.57	38.13	100	99.9	46	97.34	89.99
Sample117	452.86	44.25	100	99.95	46.56	97.4	89.86
Sample118	141.48	22.73	100	99.79	43.88	97.44	90.29
Sample119	227.86	32.08	100	99.89	45.88	97.64	90.47
Sample120	275.6	29.56	100	99.95	44.65	97.64	91.17
Sample121	488.48	38.34	100	99.97	45.67	97.37	90.37
Sample122	713.31	31.78	100	99.95	44.65	98.31	92.9
Sample123	233.89	25.89	100	99.86	43.76	97.95	91.66
Sample124	375.8	34.46	100	99.91	45.01	98.2	92.64
Sample125	377.37	42.03	100	99.92	45.94	97	89.58
Sample126	405.68	28.7	100	99.84	45.02	97.22	88.93
Sample127	442.89	36.44	100	99.93	45.39	98	91.87
Sample128	712.4	36.22	100	99.95	45.33	98.1	92.31
Sample129	392.36	39.52	99.99	99.83	45.79	97.33	90.16
Sample130	223.2	31.99	100	99.87	44.99	97.47	89.75
Sample131	316.7	38.98	100	99.95	46.45	97.8	91.18
Sample132	341.1	42.77	100	99.96	45.99	96.28	87.58
Sample133	351.95	35.17	100	99.93	45.93	97.52	90.66
Sample134	552.04	32.81	100	99.93	45.67	97.72	90.78
Sample135	312.2	16.16	100	99.89	42.22	98.06	91.93
Sample136	286.85	38.4	100	99.93	45.91	97.41	90.51
Sample137	247.85	33.17	100	99.92	47.4	96.89	89
Sample138	376.2	31.26	100	99.94	45.62	96.8	89.3
Sample139	494.79	33.58	100	99.94	45.56	96.64	88.84
Sample140	109.3	39.65	100	99.92	45.51	97.48	90.18
Sample141	293.85	34.26	100	99.94	45.28	96.97	89.07
Sample142	335.85	22.57	100	99.93	43.69	97.62	90.51
Sample143	283.24	20.92	100	99.95	43.94	97.45	89.96
Sample144	221.74	22.85	100	99.97	44.37	97.43	89.9
Sample145	390.78	34.84	100	99.93	46.06	97.59	90.91
Sample146	410.52	17.5	100	99.92	43.36	97.66	90.97
Sample147	411.19	37.36	100	99.91	46.12	97.07	89.84
Sample148	424.14	38.3	100	99.93	45.6	97.21	90.27
Sample149	527.34	33.31	100	99.9	45.66	98.28	92.9
Sample150	449.63	36.38	100	99.94	45.98	96.7	88.46
Sample151	178.45	28.66	100	99.96	45.65	97.69	91.13
Sample152	428.89	35.61	100	99.93	45.74	97.7	91.17
Sample153	490.4	42.07	100	99.93	46.22	97.1	89.59
Sample154	403.78	32.6	100	99.91	45.13	96.59	88.43
Sample155	395.03	40.55	100	99.91	46.52	96.06	87.16
Sample156	155.88	39.1	100	99.91	45.98	98.05	91.89
Sample157	432.67	34.43	100	99.94	44.7	97.94	91.67
Sample158	410.4	42.19	100	99.89	45.59	96.54	88.35
Sample159	452.65	28.6	100	99.93	45.99	96.6	88.12
Sample160	320.46	27.25	100	99.93	44.4	97.21	89.75
Sample161	341.67	33.98	100	99.89	45.99	97.8	91.16
Sample162	336.38	15.59	100	99.84	42.95	96.55	88.24
Sample163	182.5	25.83	100	99.94	44.74	96.64	88.5
Sample164	438.48	24.89	100	99.93	44.24	97.23	89.69
Sample165	286.51	38.34	100	99.97	45.7	96.77	88.66
Sample166	196.88	39.36	100	99.97	45.07	96.97	89.17
Sample167	394.04	38.06	100	99.96	45.62	96.98	89.3
Sample168	156.49	30.11	100	99.94	44.77	96.73	88.51
Sample169	246.23	26.04	100	99.9	43.73	97.11	89.58
Sample170	244.8	36.34	100	99.93	45.76	97.29	90.06
Sample171	535.13	27.05	100	99.9	43.79	96.5	88.19
Sample172	418.45	34.32	100	99.97	45.83	97.18	89.81
Sample173	490.94	33.2	100	99.97	46.73	97.3	90.05
Sample174	301.67	27.06	100	99.93	44.44	97.05	89.39
Sample175	360.22	26.91	100	99.92	44.56	97.02	89.5
Sample176	501.91	31.29	100	99.95	45.69	96.67	88.59
Sample177	402.27	23.67	100	99.9	43.65	96.42	87.95
Sample178	545.78	17.34	100	99.96	43.26	96.87	89.13
Sample179	284.6	25.04	100	99.88	45.95	97.08	89.74
Sample180	554.32	15.94	100	99.94	42.74	96.74	88.75
Sample181	188.2	18.5	100	99.47	41.63	97.84	90.68
Sample182	347.39	25.73	100	99.86	45.36	95.16	85.34
Sample183	377.95	21.22	100	99.9	43.66	97.71	90.88
Sample184	444.73	16.72	100	99.89	42.7	97.76	91.06
Sample185	320.44	37.43	99.99	99.9	45.36	97.38	90.42
Sample186	389.04	22.03	99.99	99.81	45.08	96.45	87.49
Sample187	382.05	41.7	100	99.92	45.81	96.19	87.18
Sample188	453.54	41.26	100	99.93	45.87	96.72	88.53
Sample189	271.78	47.55	100	99.93	47.44	96.41	87.64
Sample190	230.63	41.01	100	99.88	45.47	97.04	89.35
Sample191	516.99	18.87	100	99.89	43.07	96.61	88.24
Sample192	405.19	27.32	100	99.89	44.35	96.39	87.76
Sample193	357.7	19.87	100	99.93	43.45	96.49	87.9
Sample194	307.33	22.64	100	99.92	43.81	95.61	86.5
Sample195	256.23	17.62	100	99.91	42.8	95.49	86.12
Sample196	378.86	23.12	100	99.94	43.72	96.92	89.03
Sample197	446.57	21.85	100	99.92	43.96	95.69	86.71
Sample198	431.81	26.84	100	99.92	43.98	97.1	89.3
Sample199	654.12	26.87	100	99.93	44.09	97.4	90.22
Sample200	369.92	22.35	100	99.91	43.91	97.12	89.39
Sample201	368.49	42.71	100	99.93	46.14	96.41	87.75
Sample202	604	30.15	100	99.94	44.75	95.36	85.72
Sample203	385.86	36.96	100	99.92	46.73	97.13	89.47
Sample204	246.22	29.97	100	99.93	44.98	97.44	90.69
Sample205	199.65	26.26	100	99.91	44.42	96.25	87.42
Sample206	417.41	26.88	100	99.89	44.27	97.82	91.38
Sample207	461.02	35.35	100	99.95	46.06	96.78	89.07
Sample208	358.4	31.19	100	99.89	44.84	96.74	88.91
Sample209	361.1	25.61	100	99.91	44.35	97.98	91.85
Sample210	375.67	25.06	100	99.88	43.68	96.9	88.98
Sample211	434.43	43.61	100	99.93	46.33	97.16	89.48
Sample212	366.19	25.55	100	99.84	44.48	97.71	91.12
Sample213	278.27	38.6	100	99.83	46.67	96.02	86.9
Sample214	525.44	20.25	100	99.91	43.5	97.52	90.67
Sample215	381.2	35.16	100	99.95	46.83	98.01	91.84
Sample216	354.45	33.62	100	99.9	44.95	97.25	89.32
Sample217	328.65	44.57	100	99.87	46.08	97.23	90.11
Sample218	309.91	35.58	100	99.88	44.59	97.15	89
Sample219	437.4	48.89	100	99.97	46.23	97.14	89.07
Sample220	149.26	36.1	100	99.93	45.63	96.85	88.79
Sample221	133.23	24.47	100	99.95	43.87	96.59	87.99
Sample222	536.7	48.7	100	99.97	45.95	97.6	90.44
Sample223	264.33	38.89	100	99.94	45.88	97.51	90.75
Sample224	434.31	35.55	100	99.96	45.74	97.06	89.39
Sample225	237.77	38.42	100	99.95	45.46	96.26	87.14
Sample226	430.76	38.94	100	99.94	46.33	97.81	90.97
Sample227	133.4	38.47	100	99.94	45.81	96.9	88.95
Sample228	300.53	39.27	100	99.86	46.43	97.5	90.49
Sample229	384.21	38.68	100	99.96	46.22	96.96	89.11
Sample230	415.59	41.18	100	99.93	45.92	97.55	90.62
Sample231	375.64	37.3	100	99.96	45.83	96.69	88.41
Sample232	331.8	33.47	100	99.96	45.48	96.77	88.58
Sample233	333.73	22.2	100	99.89	43.94	97.36	90.09
Sample234	301.82	37.84	100	99.92	45.7	97.08	89.52
Sample235	441.74	40.5	100	99.94	45.86	97.56	90.32
Sample236	548.17	34.8	100	99.95	45.5	97.74	90.97
Sample237	412.73	31.39	100	99.93	45.75	96.97	89.7
Sample238	254.52	20.79	100	99.8	42.89	97.66	90.18
Sample239	393.42	40.6	100	99.95	45.45	97.52	90.25
Sample240	167.63	35.02	100	99.94	45.34	96.64	88.07
Sample241	170.43	36.19	100	99.92	45.78	97.48	90.06
Sample242	377.61	31.99	100	99.8	44.31	96.84	88.02
Sample243	419.09	36.11	100	99.95	46.36	95.92	86.69
Sample244	402.03	22.4	100	99.92	43.77	96.61	88.45
Sample245	556.59	37.08	100	99.92	46.21	95.24	85.64
Sample246	478.79	18.82	100	99.88	43.12	95.97	87.28
Sample247	357.87	38.15	100	99.95	46.54	97.08	89.38
Sample248	401.02	40.03	100	99.83	45.96	97.17	89.45
Sample249	859.13	29.34	100	99.95	44.62	96.04	87.86
Sample250	549.92	34.65	100	99.93	46.05	96.75	88.7
Sample251	315.13	32.21	100	99.95	45.69	96.22	87.44
Sample252	479.34	19.62	100	99.9	43.67	97.25	89.8
Sample253	659.93	38.44	100	99.95	45.95	97.24	89.8
Sample254	544.32	18.97	100	99.94	42.9	96.75	88.69
Sample255	713.75	32.49	100	99.9	44.92	97.22	89.73
Sample256	251.68	41.22	100	99.93	45.62	97.59	90.39
Sample257	403.95	42.53	100	99.96	46.2	97.01	89.14
Sample258	378.69	40.02	100	99.94	45.56	96.97	88.99
Sample259	338.35	39.49	100	99.94	45.92	97	89.18
Sample260	470.59	38.52	100	99.93	46.27	96.69	88.38
Sample261	198.36	26.67	100	99.95	44.16	97.11	89.55
Sample262	676.44	38.81	100	99.96	46.43	96.51	87.93
Sample263	199.88	36.24	100	99.9	46.09	95.05	85.2
Sample264	394.2	24.94	100	99.91	43.82	95.9	87.42
Sample265	260.87	33.83	100	99.81	45.91	95.19	85.61
Sample266	815.76	36.74	100	99.93	45.05	96.8	89.15
Sample267	301.23	22.43	99.97	99.77	44.68	96.01	87.3
Sample268	292.29	37.96	99.98	99.77	46.03	96.06	87.44
Sample269	364.02	37.01	99.98	99.83	47.85	95.52	86.17
Sample270	357.19	23.54	100	99.81	44.77	97.02	89.23
Sample271	249.5	41.06	100	99.88	45.39	96.75	88.38
Sample272	463.98	38.47	100	99.92	46.34	96.59	88.02
Sample273	227.91	16.95	100	99.72	42.72	94.96	84.69
Sample274	305.97	37.05	100	99.92	46.67	96.87	88.67
Sample275	238.95	29.65	100	99.9	44.73	97.21	89.59
Sample276	528.1	41.19	100	99.93	46.23	96.9	88.86
Sample277	263.77	38.03	100	99.81	45.72	96.89	88.82
Sample278	257.85	28.37	100	99.86	43.38	97.3	89.8
Sample279	343.39	34.66	100	99.82	45.91	96.9	89.5
Sample280	553.7	37.72	100	99.93	45.67	96.77	89.1
Sample281	427.03	39.16	100	99.88	46.21	96.72	89.01
Sample282	510.8	40.99	100	99.92	46.07	97.36	90.09
Sample283	250.49	39.32	100	99.82	46.36	96.86	88.85
Sample284	434.95	29.34	100	99.89	46.89	95.8	86.39
Sample285	579.92	38.48	100	99.91	46.44	96.31	87.94
Sample286	305.08	37.68	100	99.79	46.05	96.38	88.11
Sample287	471.22	25.45	100	99.88	44.19	96.7	88.87
Sample288	239.8	22.9	100	99.85	43.49	97.53	90.71
Sample289	569.44	40.91	100	99.95	45.52	96.37	87.84
Sample290	191.11	39.32	100	99.81	45.27	96.44	88.01
Sample291	378.48	41.39	99.98	99.76	45.59	96.94	89.12
Sample292	414.55	41.36	99.97	99.83	45.38	96.78	88.7
Sample293	500.64	37.33	100	99.89	45.72	97.02	89.31
Sample294	351.82	17.04	100	99.86	43.09	97.32	90.12
Sample295	368.41	30.72	100	99.91	44.91	97.09	89.53
Sample296	405.57	37.82	100	99.93	45.82	96.9	88.96
Sample297	299.44	18.76	100	99.86	43.11	97.33	90.09
Sample298	426.74	39.83	100	99.93	46.42	96.59	88.03
Sample299	369.95	42.15	100	99.89	45.56	95.88	87.11
Sample300	751.19	38.83	100	99.94	46.14	96.39	87.81
Sample301	602.62	27.93	100	99.94	46.11	95.72	87
Sample302	376.56	38.34	100	99.92	46.01	96.17	87.1
Sample303	430.48	42.86	100	99.96	46.21	97.25	89.78
Sample304	354.57	35.28	100	99.95	45.35	96.72	88.63
Sample305	178.47	35.83	100	99.92	45.14	96.87	89
Sample306	448.42	42.38	100	99.93	46.17	96.48	87.88
Sample307	460.4	42.87	100	99.98	45.67	97.17	89.53
Sample308	408.88	38.13	100	99.87	45.27	96.66	88.59
Sample309	356.31	36	100	99.89	45.36	96.42	88
Sample310	450.85	26.31	100	99.89	43.48	97.83	90.84
Sample311	449.63	35.96	100	99.94	45.64	96.94	88.71
Sample312	326.63	21.41	100	99.93	45.64	97.05	89.29
Sample313	310.25	40.33	100	99.92	46.26	96.67	88.49
Sample314	401.89	40.02	100	99.93	46.19	96.96	89.39
Sample315	311.89	25.05	100	99.87	43.8	96.46	87.94
Sample316	391.76	40.96	100	99.94	45.86	96.82	88.79
Sample317	341.33	36.11	100	99.83	46.21	93.9	80.92
Sample318	284.82	31.99	100	99.92	44.73	96.66	88.71
Sample319	400.67	28.14	100	99.86	44.61	96.34	87.96
Sample320	424.52	39.83	100	99.91	46.04	97.3	89.89
Sample321	315.89	34.88	100	99.77	45.3	96.51	88.23
Sample322	635.6	40.69	100	99.91	45.85	96.93	89.05
Sample323	231.78	29.27	100	99.63	45.48	96.2	87.47
Sample324	456.94	29.39	100	99.86	44.82	95.78	87.03
Sample325	581.75	43.62	100	99.94	46.87	97.12	89.61
Sample326	428.74	22.04	100	99.95	43.83	97.44	90.27
Sample327	275.08	38.73	100	99.92	46.41	97.07	89.25
Sample328	375.9	31.02	100	99.91	45.36	97.23	89.71
Sample329	425.1	40.71	100	99.95	46.04	97.36	89.97
Sample330	334.49	38.6	100	99.91	46.69	97.23	89.74
Sample331	230.47	18.73	100	99.89	43.88	97.62	90.81
Sample332	439.09	44.11	100	99.92	46.56	97.41	90.34
Sample333	317.69	27.36	100	99.89	44.78	97.37	89.97
Sample334	286.04	24.09	100	99.79	43.47	97.53	90.61
Sample335	535.71	44.22	100	99.94	46.92	96.75	88.42
Sample336	285.82	26.83	100	99.72	44.71	94.54	79.95
Sample337	396.83	28.06	100	99.91	44.46	96.7	88.7
Sample338	475.04	40.64	100	99.9	46.53	97.21	89.58
Sample339	288.7	20.48	100	99.92	43.54	97.08	89.49
Sample340	355.05	45.14	100	99.88	47.17	96.89	88.74
Sample341	376.67	27.55	100	99.91	44.29	97.46	90.38
Sample342	336.8	18.63	99.99	99.79	42.94	95.84	84.7
Sample343	352.52	30.5	100	99.88	45.08	96.43	88.18
Sample344	215.11	22.78	100	99.74	43.78	95.78	84.49
Sample345	363.42	42.73	99.99	99.86	46.6	96.68	88.6
Sample346	296.54	24.3	100	99.83	45.38	95.77	86.94
Sample347	398.87	25.41	100	99.86	44.32	96.82	88.97
Sample348	264.1	17.17	100	99.73	43.25	95.64	86.44
Sample349	247.64	17.81	100	99.88	43.3	97.44	90.16
Sample350	300.96	24.98	100	99.83	44.19	96.53	88.43
Sample351	318.81	23.9	100	99.89	44.64	97.89	91.44
Sample352	438.86	40.12	100	99.9	46.14	96.86	88.58
Sample353	368.18	32.76	100	99.92	44.96	97.47	90.34
Sample354	443.89	36.44	100	99.93	45.97	96.89	89.11
Sample355	561.22	41.96	100	99.95	46.23	97	89.04
Sample356	397.86	23.25	100	99.92	43.98	96.88	88.57
Sample357	408.52	29.7	100	99.9	44.54	97.38	90.33
Sample358	302.98	41.85	100	99.85	46.38	96.61	88.03
Sample359	413.71	31.29	100	99.89	45.1	96.65	88.27
Sample360	338.5	30.7	99.99	99.89	45.65	97.34	90.1
Sample361	348.03	29.41	100	99.93	44.57	97.43	90.09
Sample362	488.93	40.45	100	99.95	46.4	97.7	91.09
Sample363	294.93	34.23	100	99.85	45.76	96.95	88.97
Sample364	606.77	42.08	100	99.93	46.49	96.91	88.99
Sample365	342.39	27.82	100	99.82	44.17	98.05	92.04
Sample366	409.13	24.39	100	99.93	44.15	97.01	89.2
Sample367	395.41	19.36	100	99.87	43.58	96.86	88.64
Sample368	657.49	33.67	100	99.92	45.34	96.61	88.65
Sample369	217.91	32.58	100	99.74	45.03	97.41	90.37
Sample370	406.62	43.85	100	99.91	46.07	97.15	89.56
Sample371	559.41	39.79	100	99.94	46.16	96.31	87.86
Sample372	325.24	24.64	100	99.9	43.85	97.05	89.04
Sample373	428.58	33.14	100	99.91	45.04	97.1	89.31
Sample374	331.58	38.41	99.99	99.87	46.92	95.63	86.66
Sample375	587.49	27.66	100	99.9	44.21	95.66	86.69
Sample376	248.36	18.62	100	99.75	43.27	96.03	87.53
Sample377	246.17	39.87	100	99.92	46.55	96.5	88.01
Sample378	366.32	43.61	100	99.81	47.73	96.51	88.12
Sample379	374.59	19.72	100	99.84	43.19	97.62	90.88
Sample380	377.66	24.03	100	99.9	44.32	97.71	90.97
Sample381	380.37	27.61	99.99	99.91	44.83	97.95	91.72
Sample382	549.16	40.22	100	99.94	46.02	96.95	88.77
Sample383	239.47	20.47	100	99.86	43.19	97.51	90.52
Sample384	216.41	17.6	100	99.82	43.13	97.6	90.79
Sample385	271.07	39.37	100	99.77	46.25	95.99	86.76
Sample386	370.38	41.4	100	99.95	46.62	97.14	89.56
Sample387	260.7	20.57	100	99.86	43.45	97.56	90.68
Sample388	428.37	40.44	100	99.92	45.58	97.74	91.27
Sample389	393.39	23.9	100	99.85	44.26	97.17	89.42
Sample390	293.23	44.08	99.99	99.77	46.26	97.39	90.26
Sample391	199.72	31.31	100	99.88	44.75	97.56	90.71
Sample392	273.09	36.61	100	99.84	45.68	96.9	88.64
Sample393	293.18	38.46	100	99.91	46.06	96.65	88.22
Sample394	365.54	24.44	100	99.9	44.38	97.5	90.31
Sample395	220.11	28.96	99.99	99.76	44.87	96.96	88.9
Sample396	266.23	22.24	99.99	99.7	44.03	97.85	91.42
Sample397	374.42	22.7	100	99.88	43.62	97.12	89.56
Sample398	483.75	34.41	100	99.93	45.6	96.9	89.13
Sample399	330.01	37.39	100	99.91	46.55	96.21	87.64
Sample400	368.52	41.6	100	99.93	46.62	97.31	90.02
Sample401	420.97	37.69	100	99.89	46.44	96	87.48
Sample402	320.14	29.93	100	99.82	44.61	97.28	89.83
Sample403	213.71	23.27	100	99.77	43.39	96.5	88.76
Sample404	282.75	39.18	100	99.92	46.15	96.49	87.57
Sample405	379.99	19.28	100	99.88	43.41	97.7	90.79
Sample406	508.09	42.75	100	99.95	46.53	97.76	91.25
Sample407	653.83	42.1	100	99.95	46.66	96.77	88.48
Sample408	289.21	21.82	100	99.89	44.17	97.83	91.39
Sample409	428.43	25.71	100	99.91	43.91	97.53	90.58
Sample410	415.95	17.52	100	99.9	42.86	96.8	88.57
Sample411	468.15	25.92	100	99.91	44.65	96.8	88.71
Sample412	377.77	22.81	100	99.86	43.15	97.25	89.8
Sample413	589.79	44.69	100	99.94	46.04	96.43	87.8
Sample414	324.12	38.86	100	99.84	46.39	96.09	86.97
Sample415	478.98	45.61	100	99.95	46.03	97.32	90.19
Sample416	245.97	20.41	99.99	99.86	43.61	97.53	90.58
Sample417	343.33	33.69	100	99.89	44.97	97.25	89.64
Sample418	316.04	22.92	99.99	99.75	43.47	97.06	89.28
Sample419	408.31	23.32	100	99.93	44.65	96.95	89.22
Sample420	221.11	32.28	100	99.87	45.4	94.39	79.69
Sample421	393.62	19.63	100	99.87	43.02	97.07	89.46
Sample422	379.52	21.68	100	99.92	44.55	97.23	89.36
Sample423	270.92	35.93	100	99.8	45.73	96.14	87.1
Sample424	371.39	41.81	100	99.7	46.45	95.86	87.13
Sample425	425.95	42.46	100	99.94	45.61	96.92	88.64
Sample426	343.02	29.7	100	99.83	44.64	97.44	90.34
Sample427	200.11	26.86	100	99.61	44.02	97.72	91.11
Sample428	382.4	19.72	100	99.89	43.5	97.89	91.56
Sample429	406.84	26.04	100	99.93	44.2	97.12	89.68
Sample430	322.23	40.67	100	99.86	46.35	96.93	88.96
Sample431	584.54	44.26	100	99.96	45.95	97.21	89.49
Sample432	344.15	40.51	100	99.93	46.92	96.47	87.97
Sample433	576	33.39	100	99.94	45.48	96.83	88.59
Sample434	403.61	43.99	100	99.87	47.01	96.75	88.44
Sample435	584.36	31.18	100	99.9	44.74	97.08	89.47
Sample436	496.19	42.64	100	99.94	46.16	96.63	87.97
Sample437	372.42	22.58	100	99.9	43.46	97.28	90.18
Sample438	464.36	29.67	100	99.91	44.84	96.26	88.11
Sample439	291.38	28.23	99.99	99.68	45.08	97.13	89.47
Sample440	304.76	18.39	99.99	99.83	43.23	97.69	91.06
Sample441	367.91	42.13	100	99.87	46.55	96.37	87.8
Sample442	345.19	25.67	100	99.87	44.3	97.17	89.59
Sample443	360.02	35.17	100	99.91	45.77	95.75	86.97
Sample444	446.49	29.58	100	99.85	44.82	96.95	89.14
Sample445	332.72	25.25	100	99.85	44	96.81	88.89
Sample446	459.17	37.61	100	99.93	45.55	96.12	87.27
Sample447	435.72	21.11	100	99.89	42.95	97.78	91.45
Sample448	272.55	26.58	100	99.81	44.21	97.03	88.71
Sample449	438.72	40.65	100	99.94	46.57	96.78	88.35
Sample450	278.59	31.37	100	99.72	45.1	97.72	90.97
Sample451	303.73	33.19	99.99	99.82	46.11	96.86	89.03
Sample452	502.18	39.06	100	99.92	46.63	97.32	89.83
Sample453	308.02	37.67	100	99.86	45.27	96.7	88.66
Sample454	296.61	24.93	100	99.84	44.62	95.62	86.6
Sample455	512.84	41.52	100	99.92	46.5	95.15	85.61
Sample456	311.16	20.59	100	99.86	43.94	95.81	86.9
Sample457	303.72	40.54	100	99.91	46.45	96.78	88.6
Sample458	318.19	42.64	100	99.83	46.37	96.93	88.44
Sample459	604.33	43.86	100	99.94	46.68	96.9	88.64
Sample460	352.9	41.05	100	99.86	46.07	97.56	90.58
Sample461	281	40.58	100	99.9	46.62	96.47	87.94
Sample462	289.73	24.33	100	99.87	44.29	97.28	89.75
Sample463	376.81	38.85	100	99.92	46.34	96.18	87.44
Sample464	237.1	27.04	100	99.82	43.75	97.22	89.98
Sample465	333.63	31.43	100	99.79	44.17	96.41	88.08
Sample466	385.73	39.36	100	99.93	46.45	96.97	88.82
Sample467	379.48	42.79	100	99.87	46.69	96.53	87.88
Sample468	618.8	32.94	100	99.93	44.34	96.41	87.9
Sample469	487.17	42.02	100	99.88	46.26	96.43	88
Sample470	369.36	25.74	100	99.82	43.28	97.5	90.47
Sample471	420.97	36.67	100	99.93	46.4	96.18	87.17
Sample472	322.47	24.68	100	99.85	45.25	96.87	89.02
Sample473	435.16	42.13	100	99.83	46.45	96.69	88.47
Sample474	364.64	27.57	100	99.88	43.87	97.19	89.73
Sample475	348.83	23.3	99.99	99.87	43.9	97.34	90.04
Sample476	450.91	42.77	100	99.89	46.27	96.31	87.38
Sample477	491.19	40.01	100	99.94	46.21	96.71	88.12
Sample478	218.97	36.11	100	99.79	45.48	96.9	89.03
Sample479	339.65	41.32	100	99.89	47.05	97.42	90.19
Sample480	325.42	38.89	100	99.9	46.79	97.26	89.8
Sample481	426.43	42.06	100	99.92	45.75	96.87	88.74
Sample482	468.67	40.73	100	99.91	45.72	97.16	89.46
Sample483	537.2	27.19	100	99.92	45.07	97.2	89.89
Sample484	356.06	26.02	100	99.83	44.45	97.25	90.03
Sample485	301.67	37.97	100	99.85	46.11	96.76	88.67
Sample486	425.5	28.17	100	99.88	43.54	97.29	89.85
Sample487	335.41	33.87	100	99.86	45.78	97.2	89.67
Sample488	352.45	18.78	100	99.87	43.33	97.51	90.62
Sample489	329.61	43.12	100	99.91	46.73	96.58	88.34
Sample490	381.93	21.91	100	99.88	43.7	97.57	90.66
Sample491	522.87	39.94	100	99.92	45.55	97.1	89.38
Sample492	338.97	36	100	99.89	45.87	94.02	78.95
Sample493	420.39	19.21	100	99.9	42.86	97.76	91.22
Sample494	389.1	39.87	100	99.9	46.29	95.16	83.14
Sample495	467.54	31.49	100	99.94	44.44	97.04	89.09
Sample496	402.95	31.02	100	99.9	45.3	96.7	88.61
Sample497	316.77	27.41	100	99.85	43.93	96.44	87.88
Sample498	323.51	39.85	100	99.86	46.63	95.13	85.52
Sample499	335.01	41.36	100	99.94	46.67	96.57	88.16
Sample500	349.26	41.61	100	99.92	46.66	96.75	88.68
Sample501	408.25	44.34	100	99.92	46	96.3	87.6
Sample502	444.65	42.64	100	99.94	46.23	97.71	91.03
Sample503	291.48	23.1	100	99.89	44.27	97.08	89.56
Sample504	507.31	36.52	100	99.97	45.8	96.2	87.65
Sample505	390.32	28.03	100	99.87	44.51	96.5	88.44
Sample506	392.31	32.85	100	99.92	45.05	98.02	92.01
Sample507	272.98	39.19	100	99.92	47.33	96.92	89.2
Sample508	214.39	28.08	100	99.79	44.97	97.23	89.63
Sample509	411.26	39.71	100	99.94	45.87	97.1	89.69
Sample510	434.58	20.54	100	99.82	42.62	96.83	88.76
Sample511	253.4	29.02	100	99.78	44.66	97.56	90.59
Sample512	418.87	27.86	100	99.91	43.37	97.28	89.8
Sample513	309.67	26.47	100	99.81	45.1	97.04	89.43
Sample514	369.76	16.06	100	99.84	42.86	94.75	80.38
Sample515	318.23	19.99	100	99.84	43.25	97.84	91.38
Sample516	386.22	22.32	100	99.89	43.14	97.41	90.19
Sample517	435.15	43.89	100	99.95	46.32	96.97	89.06
Sample518	295.89	40.52	100	99.91	45.88	97.2	89.78
Sample519	248.21	24.84	100	99.82	44.19	95.97	86.67
Sample520	371.61	25.41	100	99.88	44.4	97.66	90.95
Sample521	367.48	40.7	100	99.86	45.98	96.99	89.12
Sample522	262.73	37.89	100	99.9	44.42	97.57	90.81
Sample523	388.07	29.61	100	99.92	44.89	97.78	91.16
Sample524	325.03	24.69	100	99.88	44.33	97.76	91.06
Sample525	383.87	20.55	100	99.93	43.7	97.68	90.78
Sample526	369.34	30.97	100	99.94	45.6	97.27	89.77
Sample527	473.38	39.72	100	99.93	46.19	97.24	89.67
Sample528	408.86	44.15	100	99.93	46.58	96.55	87.9
Sample529	302.25	18.16	100	99.93	42.85	97.56	90.38
Sample530	193.53	31.88	100	99.94	45.66	97.32	89.82
Sample531	402.37	34.33	100	99.92	46.2	97.3	89.69
Sample532	421.38	24.21	100	99.89	43.8	97.51	90.42
Sample533	376.1	41.98	100	99.92	45.91	97.26	89.8
Sample534	315.77	24.56	100	99.84	44.31	96.53	88.36
Sample535	303.25	28.02	100	99.88	45.11	97.66	91
Sample536	552.85	43.78	100	99.94	45.82	96.69	88.31
Sample537	321.02	20.3	100	99.87	43.21	96.17	87.32
Sample538	342.56	42.27	100	99.87	46.65	96.21	87.53
Sample539	531.54	42.97	100	99.95	45.3	96.97	88.99
Sample540	295.66	26.28	100	99.91	44.51	97.4	90.31
Sample541	503.48	30.24	100	99.9	44.47	96.61	88.26
Sample542	422.15	42.1	100	99.91	45.46	97.2	89.65
Sample543	414.65	40.79	100	99.9	46.72	96.45	87.95
Sample544	425.6	28.62	100	99.93	44.95	97.58	90.57
Sample545	380	36.53	100	99.86	45.02	97.62	90.98
Sample546	137.73	33.95	100	99.77	46.85	97.05	89.55
Sample547	395.32	33	100	99.88	45.2	97.07	89.02
Sample548	643.62	43.83	100	99.94	46.66	96.82	88.44
Sample549	382.04	30.85	100	99.92	44.36	96.84	88.81
Sample550	423.63	42.13	100	99.86	46.34	96.83	88.57
Sample551	334.74	21.96	100	99.81	43.61	96.28	87.64
Sample552	415.92	22.52	100	99.93	44.25	97.3	90.09
Sample553	369.19	28.22	100	99.84	44.39	96.12	87.84
Sample554	466.59	34.97	100	99.91	45.34	96.61	88.19
Sample555	406.03	39.53	100	99.9	45.29	97	89.34
Sample556	297.27	32.24	100	99.73	45.27	97.09	89.36
Sample557	343.14	32.96	100	99.75	45.3	97.24	89.93
Sample558	296.51	24.57	100	99.87	44.16	97.56	90.88
Sample559	241.42	22.61	100	99.74	43.95	96.38	88.41
Sample560	266.15	45.26	100	99.81	46.7	97.31	90.16
Sample561	354.42	30.92	100	99.89	44.82	97.05	89.58
Sample562	405.9	30.21	100	99.89	43.97	97.23	89.99
Sample563	233.79	44.52	99.99	99.68	46.27	94.34	79.54
Sample564	542.85	44.54	100	99.95	45.94	97.1	89.51
Sample565	434.59	43.61	100	99.92	46.29	96.92	88.77
Sample566	319.99	30.2	99.99	99.71	44.43	94.59	80.01
Sample567	329.48	40.77	100	99.88	46.79	96.89	88.96
Sample568	503.78	41.66	100	99.89	46.45	95.54	86.47
Sample569	328.45	42.57	100	99.85	46.12	96.55	87.93
Sample570	267.99	39.86	100	99.77	46.23	97.22	89.71
Sample571	352.6	30.79	100	99.88	45.13	96.08	87.72
Sample572	282.32	16.44	100	99.85	43.97	97.61	90.78
Sample573	438.53	39.31	100	99.94	47.09	96.66	88.41
Sample574	521.94	41.46	100	99.96	46.6	97.48	90.3
Sample575	522.71	41.51	100	99.92	46.72	96.62	88.06
Sample576	465.56	38.51	100	99.89	46.38	97.11	89.24
Sample577	373.99	38.77	100	99.89	46.71	96.66	88.45
Sample578	311.85	38.54	100	99.87	46.31	97.47	90.31
Sample579	270.77	41.28	100	99.9	46.52	97.53	90.6
Sample580	403.14	39.26	100	99.94	47.19	96.51	88.03
Sample581	621.86	36.77	100	99.93	45.42	97.17	89.76
Sample582	339.05	37.67	100	99.84	45.69	96.3	87.34
Sample583	492.34	40.22	100	99.94	46.67	97.6	90.69
Sample584	440.48	41.24	100	99.93	46.91	97.49	90.44
Sample585	394.11	34.36	100	99.88	45.69	97.16	89.64
Sample586	412.88	26.71	100	99.86	44.39	97.58	90.59
Sample587	445.17	24.14	100	99.88	44.19	97.49	90.31
Sample588	702.43	41.74	100	99.94	46.15	97.31	89.99
Sample589	463.78	26.33	100	99.9	44.12	97.45	90.4
Sample590	466.38	33.15	100	99.94	45.95	96.71	88.53
Sample591	203.96	35.49	100	99.79	46.35	96.6	88.76
Sample592	284.98	24.99	100	99.83	44.38	96.12	87.05
Sample593	304.71	18.02	100	99.79	43.47	97.01	89.27
Sample594	340.47	26.34	100	99.86	44.82	96.81	88.81
Sample595	612.67	43.69	100	99.96	46.14	97.18	89.4
Sample596	333.47	21.05	100	99.82	43.19	97	88.86
Sample597	404.1	43.47	100	99.92	47.03	97.02	89.13
Sample598	334.02	43.48	100	99.73	46.06	97.33	89.81
Sample599	562.35	42.02	100	99.94	45.86	97.24	89.78
Sample600	470.53	35.06	100	99.94	46.04	96.57	88.62
Sample601	332.23	33.58	99.99	99.85	45.7	96.82	88.59
Sample602	237.59	45.38	100	99.88	46.19	96.38	87.83
Sample603	296.27	43.24	100	99.86	45.58	97.2	89.63
Sample604	393.07	19.58	100	99.93	43.23	97.3	89.92
Sample605	270.26	20.09	100	99.88	42.92	97.74	91.16
Sample606	400.74	44.1	100	99.93	46.4	97.07	89.29
Sample607	321.64	31.3	100	99.91	45.69	97.11	89.69
Sample608	310.62	30.82	100	99.81	45.76	97.13	89.67
Sample609	287.62	35.12	100	99.84	45.26	97.35	90.19
Sample610	443.86	40.68	100	99.89	46.17	97.5	90.51
Sample611	417.44	24.58	100	99.87	44.18	97.62	90.83
Sample612	356.32	37.58	100	99.85	45.68	96.64	88.34
Sample613	369.81	40.23	100	99.85	46.92	97.24	89.86
Sample614	314.43	28.19	100	99.8	44.53	97.23	89.73
Sample615	453.92	45.23	100	99.92	46.28	96.45	87.91
Sample616	368.77	43.71	100	99.93	46.01	95.88	87.06
Sample617	555.73	37.39	100	99.95	45.08	97.12	89.42
Sample618	399.98	41.57	100	99.91	46.94	96.83	88.94
Sample619	418.56	41.1	100	99.92	47.02	96.67	88.6
Sample620	375.52	40.51	100	99.88	47.03	96.65	88.52
Sample621	235.1	40.8	100	99.96	47.64	97.34	89.98
Sample622	392.91	36.16	100	99.86	46.2	97.03	89.45
Sample623	476.62	39.86	100	99.92	46.48	97.39	90.17
Sample624	372.33	41.22	100	99.76	45.58	96.86	89.14
Sample625	458.43	38.61	100	99.9	46.62	96.53	88.34
Sample626	328.11	34.46	100	99.73	44.63	97.11	89.74
Sample627	303.59	16.87	100	99.79	42.85	97.74	91.04
Sample628	231.36	23.73	100	99.68	44.63	97.17	89.83
Sample629	437.43	41.7	100	99.92	47.56	96.18	87.18
Sample630	343.87	24.55	100	99.89	44.19	97.45	90.43
Sample631	391.24	40.22	100	99.88	47.25	96.93	89.17
Sample632	384.35	39.21	100	99.9	46.23	97.29	89.88
Sample633	594.76	43.03	100	99.95	46.05	97.12	89.5
Sample634	294.85	37.82	100	99.7	44.59	96.51	88.31
Sample635	378.98	23.99	100	99.87	43.69	97.14	89.61
Sample636	299.86	43.7	100	99.87	45.59	97.27	89.67
Sample637	291.12	39.34	100	99.87	46.54	96.17	87.44
Sample638	389	28.08	100	99.88	44.84	96.83	88.95
Sample639	318.99	33.26	100	99.81	44.8	97.38	90.15
Sample640	563.3	43.28	100	99.95	46.44	96.47	87.78
Sample641	384.39	25.91	100	99.93	44.45	97.66	90.89
Sample642	368.02	40.68	100	99.92	46.77	96.32	87.63
Sample643	395.14	27.79	100	99.91	44.14	96.87	89.09
Sample644	482.21	32.82	100	99.88	44.75	96.47	87.82
Sample645	410.13	40.91	100	99.91	46.47	96.42	87.79
Sample646	358.82	37.31	100	99.88	45.41	96.79	88.46
Sample647	268.97	30.48	100	99.91	45.05	96.36	88
Sample648	362.77	41.83	100	99.92	46.84	97.53	90.48
Sample649	392	41.37	100	99.92	46.93	96.34	87.69
Sample650	553.63	45.57	100	99.97	46.15	97.11	89.59
Sample651	254.38	20.3	100	99.86	44.36	97.08	89.14
Sample652	283.63	22.93	100	99.87	44.29	97.29	89.74
Sample653	478.22	42.61	100	99.94	45.93	96.97	88.76
Sample654	305.88	41.5	100	99.92	46.43	96.87	89.07
Sample655	257.69	16.71	100	99.86	43.7	97.34	90.07
Sample656	373.11	23.88	100	99.92	44.44	96.58	88.45
Sample657	264.56	28.84	100	99.86	44.28	96.87	88.85
Sample658	307.69	25.71	100	99.73	44.2	97.15	89.71
Sample659	503.92	42.18	100	99.93	45.94	97.03	88.96
Sample660	243.05	33.68	99.99	99.83	45.27	97.06	89.35
Sample661	495.8	43.89	100	99.91	46.42	96.43	87.81
Sample662	430.69	26.98	100	99.94	44.36	94.5	79.9
Sample663	350.3	23.51	100	99.8	43.87	96.4	87.97
Sample664	367.98	44.16	100	99.96	46.23	96.82	88.69
Sample665	270.92	37.18	100	99.77	46.34	93.8	80.7
Sample666	401.31	20.06	100	99.88	43.96	96.64	88.38
Sample667	333.58	24.07	100	99.87	43.53	96.95	89.14
Sample668	389.24	39.84	100	99.95	45.91	96.9	89.19
Sample669	451.23	35.31	100	99.93	46.03	97.47	90.29
Sample670	381.5	31.15	100	99.88	45.69	96.26	87.59
Sample671	415.32	41.17	100	99.87	46.65	95.67	86.75
Sample672	384.82	39.22	100	99.87	46.18	95.14	83.08
Sample673	406.97	40.93	100	99.91	46.06	96.75	88.4
Sample674	366.62	23.88	100	99.88	43.13	96.73	88.71
Sample675	529.71	40.67	100	99.95	46.33	97.34	89.9
Sample676	359.61	32.45	100	99.88	44.42	96.56	88.32
Sample677	457.19	40.95	100	99.96	46.88	96.96	89.23
Sample678	414.73	45.54	100	99.95	46.73	96.32	87.78
Sample679	369.99	40.63	100	99.87	46.16	95.3	83.43
Sample680	384.71	39.65	99.99	99.84	46.12	95.35	83.49
Sample681	375.31	32.66	99.99	99.86	46.65	96.81	88.91
Sample682	259.67	24.87	99.99	99.7	44.75	95.7	84.35
Sample683	320.87	38.68	100	99.85	46.6	95.22	85.74
Sample684	329.72	23.53	100	99.89	44.72	97.13	89.66
Sample685	647.63	39.56	100	99.94	45.65	97.21	89.75
Sample686	369.89	40.1	100	99.92	45.91	96.85	88.88
Sample687	460.45	21.4	100	99.92	43.3	97.39	90.1
Sample688	385.87	37.44	100	99.86	46.6	93.57	80.15
Sample689	367.82	36.9	100	99.85	45.99	96.67	88.26
Sample690	492.13	42.75	100	99.88	46.05	96.81	88.85
Sample691	290.61	20.27	100	99.89	43.03	97.31	89.72
Sample692	444.43	26.16	100	99.91	44.67	97.14	89.79
Sample693	441.43	40.89	100	99.91	46.34	97.28	89.62
Sample694	360.32	23.39	100	99.93	43.8	97.16	89.86
Sample695	590.07	43.97	100	99.95	46.19	97.19	89.69
Sample696	268.99	17.63	100	99.89	43.16	97.72	91.03
Sample697	344.33	25.46	100	99.88	44.85	98.04	91.89
Sample698	223.32	43.35	100	99.69	45.75	96.73	88.71
Sample699	286.02	26.26	100	99.89	44.21	97.75	91.1
Sample700	334.88	42.18	100	99.94	46.61	97.43	90.11
Sample701	384.65	30.16	100	99.95	44.76	97.57	90.53
Sample702	560.2	25.14	100	99.93	44.38	96.99	88.91
Sample703	484.21	41.18	100	99.94	46.2	97.21	89.8
Sample704	391.72	40.57	100	99.92	47.05	96.71	88.36
Sample705	395.58	39.14	100	99.95	46.08	96.78	88.62
Sample706	477.5	39.42	100	99.9	46.46	97.31	89.97
Sample707	277.7	38.89	99.99	99.68	46.96	93.99	81.2
Sample708	340.98	30.39	100	99.9	45.07	97.07	89.68
Sample709	335.76	30.45	100	99.95	44.88	97.15	89.58
Sample710	503.66	33.15	100	99.9	45.19	97.77	91.3
Sample711	374.17	33.52	100	99.8	46.03	93.87	80.94
Sample712	322	41.08	100	99.93	46.44	97.01	89.17
Sample713	532.29	38.49	100	99.91	45.29	96.72	88.73
Sample714	388.88	41.06	100	99.94	46.27	96.01	86.8
Sample715	431.78	20.08	100	99.89	43.19	97.31	89.92
Sample716	232.86	17.01	100	99.7	43.26	96.93	88.91
Sample717	180.59	24.61	100	99.86	44.46	97.55	90.59
Sample718	541.08	26.8	100	99.95	44.33	97.66	90.88
Sample719	387.16	38.34	100	99.93	46.45	96.78	88.83
Sample720	345.93	19.54	100	99.86	43.48	96.99	89.36
Sample721	541.97	40.97	100	99.94	45.99	97.1	89.45
Sample722	333.94	33.13	100	99.87	46.3	96.77	88.82
Sample723	330.38	17.39	100	99.87	43.24	97.75	91.13
Sample724	463.86	27.7	100	99.84	43.99	96.97	89.23
Sample725	317.93	33.31	100	99.87	45.71	96.86	88.87
Sample726	419.02	28.61	100	99.91	44.93	97.7	90.98
Sample727	334.59	24.03	100	99.88	44.62	96.48	88.42
Sample728	441.39	39.5	100	99.92	46.19	97.1	89.19
Sample729	547.7	23.34	100	99.9	42.89	96.78	88.92
Sample730	258.67	24.57	99.99	99.82	44.55	96.75	88.58
Sample731	448.54	28.43	100	99.9	44.31	97.26	89.89
Sample732	306.07	22.18	100	99.84	43.65	96.74	88.89
Sample733	237.57	20.93	100	99.75	43.7	97.24	89.6
Sample734	353.8	27.2	100	99.86	45.64	96.76	88.8
Sample735	431	36.93	100	99.91	46.08	96.84	88.6
Sample736	382.59	24.04	100	99.85	44.44	96.82	88.52
Sample737	543.95	38.91	100	99.96	45.68	96.97	89.16
Sample738	286.56	29.35	100	99.8	44.84	96.67	88.55
Sample739	319.01	25.17	100	99.89	44.44	97.05	89.31
Sample740	446.27	36.92	100	99.95	45.93	96.7	88.28
Sample741	232.54	33.65	100	99.71	44.98	94.37	79.53
Sample742	261.08	21.55	100	99.84	44.3	97.27	89.66
Sample743	478.17	42.4	100	99.9	46.72	97.07	89.56
Sample744	382.99	27.41	100	99.91	44.34	96.73	89.27
Sample745	514.5	33.06	100	99.94	45.34	97.16	89.73
Sample746	437.09	29.4	100	99.92	44.7	97.45	90.31
Sample747	304.36	19.2	100	99.89	43.65	97.88	91.39
Sample748	379.18	18.42	100	99.92	43.01	97	89.31
Sample749	381.07	24.18	100	99.8	43.8	97.39	90.42
Sample750	425.09	21.55	100	99.9	43.75	96.47	87.87
Sample751	408.22	41.3	100	99.94	46.86	96.57	88.6
Sample752	421.67	29.09	100	99.89	45.12	95.84	87.13
Sample753	272.44	40.48	100	99.89	46.04	96.92	88.89
Sample754	410.93	40.52	100	99.92	46.3	97.19	89.68
Sample755	439.8	27.85	100	99.91	44.38	97	89.02
Sample756	291.96	23.86	100	99.69	44.84	94.45	79.7
Sample757	374.93	21.02	100	99.9	43.28	96.95	89.27
Sample758	364.09	22.01	100	99.87	44	97.55	90.63
Sample759	558.62	26.38	100	99.89	43.77	97.28	89.96
Sample760	270.07	22.08	100	99.83	43.82	96.92	88.99
Sample761	423.9	22.8	100	99.91	43.73	97	88.94
Sample762	463.76	43.45	100	99.9	46.03	96.07	86.81
Sample763	356.92	43.59	100	99.91	46.47	96.77	88.32
Sample764	226.67	36.64	100	99.83	46.14	96.19	87.56
Sample765	301.8	37.68	100	99.87	45.57	96.42	88.14
Sample766	386.95	45.62	100	99.92	46.18	96.46	88.05
Sample767	327.64	28.95	100	99.88	44.53	97.35	90.37
Sample768	511.46	43.1	100	99.93	47.44	96.85	88.59
Sample769	321.89	41.34	100	99.87	46.97	94.26	79.49
Sample770	466.9	33.85	100	99.87	45.51	96.11	87.21
Sample771	439	18.59	100	99.88	43.58	96.8	88.91
Sample772	278.58	25.55	100	99.79	43.94	97.13	89.59
Sample773	226.85	23.42	100	99.64	43.31	94.74	80.23
Sample774	349.51	23.37	100	99.86	43.72	97.56	90.6
Sample775	163.99	28.98	100	99.86	45.62	97.07	89.19
Sample776	378.46	24.4	100	99.83	44.88	96.82	89.08
Sample777	383.62	32.12	100	99.93	45.2	97.17	89.46
Sample778	493.27	32.19	100	99.89	45.69	97.77	91.27
Sample779	403.47	35.1	100	99.89	45.73	97.33	89.96
Sample780	314.89	22.39	100	99.88	43.7	95.94	87.3
Sample781	453.16	37.94	100	99.92	46.87	96.59	88.32
Sample782	220.46	21.95	100	99.55	44.22	94.04	81.28
Sample783	532.1	43.94	100	99.93	46.44	96.51	87.99
Sample784	382.4	40.76	100	99.89	45.64	96.76	88.64
Sample785	453.71	41.74	100	99.93	46.62	96.2	87.38
Sample786	384.33	44.72	100	99.96	46.49	96.94	89.06
Sample787	323.95	42.48	100	99.93	46.18	96.77	88.6
Sample788	286.64	37.53	100	99.82	45.91	97.02	89.3
Sample789	227.2	23.88	100	99.8	43.92	97.11	89.44
Sample790	328.03	22.54	100	99.84	43.96	96.18	87.85
Sample791	448.23	41.68	100	99.92	46.84	96.68	88.83
Sample792	440.01	21.98	100	99.87	44.05	97.49	90.25
Sample793	353.61	23.24	100	99.89	43.69	97.23	89.67
Sample794	166.12	17.29	100	99.85	43.47	97.57	90.45
Sample795	169.24	39.71	100	99.75	46.24	96.77	89.15
Sample796	288.76	37.29	99.99	99.79	46.15	96.61	88.73
Sample797	325.53	30.1	100	99.84	45.06	96.41	88.14
Sample798	338.21	32.36	100	99.87	45.39	97.48	90.61
Sample799	381.85	36.74	100	99.9	46.04	96.68	88.37
Sample800	381.97	28.01	100	99.87	44.58	97.2	89.67
Sample801	465.12	29.38	100	99.92	44.16	96.8	88.91
Sample802	382.15	36.59	100	99.91	45.48	96.47	88.13
Sample803	315.45	33	100	99.87	44.88	96.77	88.57
Sample804	355.68	22.82	100	99.86	44.17	95.81	87.06
Sample805	308.28	40.06	100	99.82	45.58	96.52	87.91
Sample806	351.17	19.86	100	99.84	43.77	97.76	91.1
Sample807	458.55	35.18	100	99.92	44.92	97.36	90
Sample808	409.94	31.95	100	99.92	44.85	97.63	90.82
Sample809	250	34.22	100	99.81	45.22	96.62	88.11
Sample810	355.44	23.08	100	99.89	43.37	97.2	89.68
Sample811	376.32	42.41	100	99.83	45.67	96.6	88.22
Sample812	376.65	25.07	100	99.87	44.66	97.38	90.01
Sample813	250.55	37.47	100	99.91	45.73	97.61	90.59
Sample814	275.31	19.53	100	99.79	43.12	97.05	88.74
Sample815	343.46	20.92	100	99.84	43.07	97.39	90.46
Sample816	456.16	42.31	100	99.88	46.76	96.97	89.27
Sample817	418.51	22.53	100	99.89	44.61	97.26	89.59
Sample818	447.21	41.74	100	99.94	46.29	96.68	88.22
Sample819	327.29	20.34	100	99.83	43.22	96.86	88.97
Sample820	285.26	35.31	100	99.83	45.27	97.16	89.38
Sample821	389.5	40.11	100	99.91	46.56	95.29	85.82
Sample822	386.33	42.43	100	99.95	46.8	97.63	90.72
Sample823	310.57	31.96	100	99.7	45.16	97.28	89.89
Sample824	388.71	30.52	100	99.9	44.9	95.53	86.36
Sample825	601.86	43.78	100	99.93	46.15	97.23	89.72
Sample826	510.42	30.18	100	99.91	44.89	96.66	88.55
Sample827	424.27	39.95	100	99.94	45.85	96.86	88.61
Sample828	372.78	23.42	100	99.93	44.86	97.2	89.98
Sample829	352.23	25.86	100	99.9	44.37	97.44	90.29
Sample830	399.01	43.45	100	99.95	46.46	96.96	88.89
Sample831	473.3	41.69	100	99.95	45.47	97.05	89.23
Sample832	504.93	42.71	100	99.93	45.86	97.09	89.34
Sample833	491.63	42.22	100	99.96	46.45	97.3	89.92
Sample834	590.02	35.71	100	99.95	46.02	96.89	88.84
Sample835	219.99	29.82	100	99.83	45.14	96.63	87.96
Sample836	401.83	20.94	100	99.9	43.24	96.89	88.58
Sample837	108.61	26.94	100	99.8	43.88	96.1	87.72
Sample838	382.25	37.03	100	99.93	45.11	96.97	89.1
Sample839	352.89	23.33	100	99.92	43.52	97.33	90.28
Sample840	389.18	25.01	100	99.89	44.58	97.32	90.1
Sample841	442.66	21.11	100	99.92	43.77	96.95	88.73
Sample842	340.39	16.6	100	99.88	41.9	96.93	89.05
Sample843	325.56	26.56	100	99.84	44.08	96.84	88.66
Sample844	307.61	27.4	100	99.85	44.57	95.94	87.14
Sample845	497.33	39.79	100	99.93	45.8	98.24	92.34
Sample846	331.52	27.5	100	99.89	45.55	95.5	86.38
Sample847	496.05	22.38	100	99.91	43.12	97.62	90.84
Sample848	348.54	34.44	100	99.74	44.71	97.95	91.83
Sample849	391.26	20.95	100	99.9	43.22	97.24	89.81
Sample850	632.39	44.41	100	99.93	46.39	96.54	88.22
Sample851	301.18	37.78	99.99	99.66	45.64	96.61	89.49
Sample852	211.96	39.43	100	99.88	47.44	96.82	88.78
Sample853	373.04	42.53	100	99.79	46.38	97.14	89.32
Sample854	455.39	33.28	100	99.85	45.73	96.64	88.56
Sample855	341.97	38.6	100	99.83	45.4	97.31	90.04
Sample856	310.47	28.98	99.99	99.68	45.36	96.89	88.86
Sample857	419.33	26.55	100	99.71	44.61	97.38	90.43
Sample858	601.13	36.7	100	99.93	46.14	96.46	87.69
Sample859	294.93	21.94	100	99.85	43.22	97.67	90.85
Sample860	382.25	28.63	100	99.84	43.48	97.62	90.65
Sample861	315.92	25.6	100	99.82	44.33	96.94	89.3
Sample862	401.19	31.47	100	99.9	45.18	97.05	89.12
Sample863	219.18	39.46	100	99.9	46.47	96.25	87.17
Sample864	356.19	43.02	100	99.87	46.74	96.72	88.37
Sample865	427.22	21.8	100	99.78	44.26	96.87	89.22
Sample866	475.71	40.06	100	99.92	45.94	96.62	87.99
Sample867	648.65	41.83	100	99.92	46.55	96.5	88.26
Sample868	306.69	28.68	100	99.83	44.01	96.59	87.91
Sample869	481.71	30.44	100	99.92	44.3	96.53	87.62
Sample870	253.52	22.51	100	99.88	43.8	97.22	89.64
Sample871	292.83	42	100	99.82	46.28	97.03	89.38
Sample872	377.31	26.62	100	99.88	44.23	97.38	90.42
Sample873	292.34	41.23	100	99.92	47.05	97.1	89.06
Sample874	372.69	24.68	100	99.86	43.9	96.98	89.33
Sample875	215.43	24.54	100	99.94	44.44	96.8	88.88
Sample876	239.25	37.39	100	99.78	45.79	97.3	89.85
Sample877	438.88	24.43	100	99.92	44.28	97.71	91
Sample878	314.05	25.54	100	99.88	44.05	97.08	89.37
Sample879	338.59	37.62	100	99.87	46.37	96.88	88.78
Sample880	337.2	22.26	100	99.9	43.55	97.33	90.05
Sample881	271.88	29.04	100	99.89	45.14	96.92	89.01
Sample882	334.35	17.34	100	99.9	42.91	97.16	89.71
Sample883	331.15	22.47	100	99.89	43.97	96.81	88.91
Sample884	280.6	36.17	99.99	99.66	46.44	97.85	91.48
Sample885	413.57	41.14	100	99.84	46.73	96.53	88.19
Sample886	251.61	32.92	100	99.72	45.91	97.21	89.44
Sample887	457.65	45.73	100	99.94	46.34	95.73	86.97
Sample888	636.29	41.08	100	99.86	46.24	96.9	89.35
Sample889	144.83	24.94	100	99.73	44.36	97.67	90.79
Sample890	259.3	30.67	99.99	99.79	46.25	97.07	89.09
Sample891	252.85	39.73	99.99	99.69	46.19	96.47	89.24
Sample892	322.02	25.15	100	99.85	44.11	97.03	89.15
Sample893	253.96	20.19	99.99	99.62	43.35	95.91	86.51
Sample894	278.88	36.75	100	99.89	45.9	97.37	89.98
Sample895	353.47	42.18	100	99.9	46.41	96.23	87.5
Sample896	387.94	35.21	99.99	99.79	44.24	97.69	90.97
Sample897	365.47	45.06	100	99.88	45.86	97.18	89.33
Sample898	315	19.92	100	99.84	43.43	96.9	88.63
Sample899	300.49	21.49	100	99.87	43.66	97.06	89.33
Sample900	378.06	25.13	100	99.92	44.04	97.07	89.58
Sample901	396.4	31.22	100	99.87	45.37	96.69	88.17
Sample902	290.07	28.28	100	99.81	44.96	97.14	89.53
Sample903	593.71	42.69	100	99.93	47.76	96.56	88.08
Sample904	386.89	31.76	100	99.9	45.09	96.13	87.29
Sample905	527.63	29.34	100	99.84	43.59	98	91.89
Sample906	363.32	22.57	100	99.9	43.07	97.01	89.44
Sample907	503.12	38.38	100	99.9	45.83	95.98	87.59
Sample908	288.65	35.49	100	99.87	45.01	97.21	89.91
Sample909	183.37	32.88	100	99.84	45.72	97.2	89.71
Sample910	312.7	21.24	100	99.61	43.08	96.75	89.92
Sample911	285.69	42.5	100	99.94	46.69	97.16	89.42
Sample912	567.04	23.71	100	99.91	43.67	96.99	89.24
Sample913	337.62	41.1	100	99.89	45.6	97.07	89.47
Sample914	499.28	40.38	100	99.9	46.02	95.63	86.76
Sample915	470.06	42.2	100	99.92	45.55	96.89	88.91
Sample916	346.82	41.87	100	99.94	46.79	96.41	87.96
Sample917	273.83	38.08	100	99.93	46.33	97.3	89.9
Sample918	290.7	24.11	100	99.86	44.62	97.48	90.37
Sample919	435.39	29.39	100	99.88	44.67	96.62	88.41
Sample920	297.42	25.22	100	99.78	44.37	96.72	88.65
Sample921	351.85	19.69	100	99.74	43.09	98.42	95.34
Sample922	372.85	44.08	100	99.89	46.73	96.76	88.52
Sample923	261.94	24.83	99.99	99.82	44.45	97.26	90.02
Sample924	314.79	19.5	100	99.9	43.42	96.85	88.64
Sample925	284.49	40	100	99.88	46.34	96.75	88.52
Sample926	465.01	21.49	100	99.87	42.73	96.55	88.05
Sample927	347.67	28.54	100	99.85	44.88	96.67	88.68
Sample928	640.79	31.4	100	99.95	44.59	96.03	87.75
Sample929	450.78	43.46	100	99.9	45.86	96.02	87.63
Sample930	168.36	25.42	100	99.88	45.78	96.92	88.67
Sample931	314	29.27	100	99.89	44.53	95.99	87.53
Sample932	499.71	34.6	100	99.92	46.49	96.61	88.4
Sample933	363.25	45.61	99.99	99.61	45.54	97.72	91.15
Sample934	457.96	27.99	100	99.94	44	97.19	89.78
Sample935	296.95	25.3	100	99.84	44	97.07	89.25
Sample936	388.77	30.44	100	99.91	44.35	97.13	89.71
Sample937	327.48	33.96	100	99.89	44.98	97.35	89.91
Sample938	276.39	24.43	100	99.81	44.35	97.54	90.81
Sample939	216.84	27.18	99.99	99.89	44.62	97.24	89.81
Sample940	266.13	22.28	99.98	99.46	42.16	98.07	92.09
Sample941	389.7	41.67	100	99.81	46.77	96.72	88.74
Sample942	462.63	43.49	100	99.95	46.73	96.93	88.87
Sample943	612.69	25.82	100	99.92	44.19	97.32	89.85
Sample944	552.7	39.83	100	99.88	45.62	97.15	89.82
Sample945	101.61	15.13	100	99.21	44.03	97.62	90.85
Sample946	532.88	33.94	100	99.95	45.79	97.03	89.51
Sample947	335.76	38.56	100	99.87	45.45	95.87	87.22
Sample948	218.76	43.97	100	99.83	46.14	97.4	90.02
Sample949	394.87	31.85	100	99.76	44.22	97.69	90.99
Sample950	337.04	22	100	99.7	42.94	97.74	91.18
Sample951	293.22	16.07	100	99.81	42.37	96.61	88.19
Sample952	290.06	19.03	99.99	99.73	43.08	96.94	89.38
Sample953	228.86	31.93	100	99.75	44.19	97.7	90.94
Sample954	264.23	38.56	100	99.81	47.33	96.8	88.39
Sample955	317.37	42.36	100	99.92	45.56	97.29	89.63
Sample956	399.11	41.78	100	99.92	46	97.05	89.25
Sample957	515.45	32.87	100	99.87	44.68	96.89	89.24
Sample958	215.65	21.46	100	99.77	44.08	97.51	90.39
Sample959	209.88	24.11	100	99.84	43.34	97.44	90.53
Sample960	185.56	21.32	100	99.79	44.91	96.96	88.77
Sample961	264.1	23.08	100	99.84	43.5	97.9	91.48
Sample962	371.52	18.84	100	99.9	43.25	97.38	90.35
Sample963	375.83	43.25	100	99.91	46.22	97.02	89.36
Sample964	287.35	19.13	100	99.82	42.81	97.51	90.79
Sample965	451.04	26.61	100	99.81	43.12	97.53	90.43
Sample966	401.68	19.04	100	99.92	43.45	96.11	87.85
Sample967	474.25	42.99	100	99.93	46.94	96.15	87.25
Sample968	276.51	24.14	100	99.88	44.97	96.54	87.88
Sample969	411.74	32.63	100	99.93	46.14	97.11	89.5
Sample970	401.67	45.58	100	99.82	45.79	97.3	89.8
Sample971	318.62	28.98	100	99.86	44.6	97.36	90.38
Sample972	389.08	35.26	100	99.93	45.52	96.2	88.07
Sample973	292.82	23.15	100	99.91	44.34	96.89	88.79
Sample974	186.38	30.72	100	99.87	44.38	96.78	88.62
Sample975	387.1	38.01	100	99.86	45.48	96.58	88.2
Sample976	304.02	38.77	100	99.85	45.49	96.14	86.94
Sample977	236.9	17.04	100	99.78	43.26	97.12	89.5
Sample978	317.14	42.83	100	99.93	46.16	97	89.16
Sample979	286.47	21.07	100	99.83	43.24	97.51	90.74
Sample980	257.59	44.83	100	99.83	46.91	97.01	88.89
Sample981	450.83	34.27	100	99.88	45.14	95.72	86.97
Sample982	241	21.41	100	99.65	43.93	97.27	89.86
Sample983	329.68	37.47	100	99.9	46.2	96.58	88.08
Sample984	368.61	45.03	99.99	99.91	46.9	97	88.84
Sample985	396.26	44.87	100	99.89	45.93	96.97	88.69
Sample986	447.26	42.91	100	99.95	46.64	96.76	88.55
Sample987	264.98	34.9	100	99.95	45.75	96.86	88.83
Sample988	378.57	24.78	100	99.84	44.24	97.44	90.31
Sample989	333.94	35.01	100	99.85	45.48	96.16	87.33
Sample990	217	22.36	100	99.81	43.34	97.72	91
Sample991	195.3	33.34	99.99	99.4	45.32	96.69	89.78
Sample992	359.16	27.27	100	99.9	44.8	97.14	89.69
Sample993	287.27	34.8	100	99.86	45.59	97.73	90.95
Sample994	425.79	34.7	100	99.83	45.25	97.78	91.41
Sample995	264.43	41.94	100	99.9	46.32	96.87	88.81
Sample996	400.29	43.36	100	99.9	46.93	96.03	87.82
Sample997	476.04	29.28	100	99.8	43.95	97	89.47
Sample998	272.63	32.2	100	99.84	44.73	97.51	90.36
Sample999	302.81	20.85	99.99	99.51	43.95	95.06	85.43
Sample1000	306.02	34.58	100	99.88	45.28	97.46	90.6
Sample1001	180.65	20.25	100	99.75	44.74	97.48	90.34
Sample1002	183.14	27.76	100	99.56	45.19	97.79	91.2
Sample1003	267.3	26.28	100	99.8	44.24	97.09	89.36
Sample1004	457.21	42.63	100	99.91	46.64	96.52	88.19
Sample1005	283.71	22.73	100	99.86	44.26	97.31	90.22
Sample1006	272.97	19.27	99.99	99.8	43.86	97.16	89.51
Sample1007	391.84	19.35	100	99.91	43.41	97.2	89.62
Sample1008	389.81	26.32	100	99.93	44.9	97.37	90.07
Sample1009	343.58	24.09	100	99.93	43.65	96.88	88.78
Sample1010	287.3	30.43	99.99	99.67	44.15	97.32	90.13
Sample1011	261.34	32.85	100	99.83	45.62	94.78	84.86
Sample1012	355.35	41.86	100	99.88	46.91	97.18	89.71
Sample1013	531.24	43.06	100	99.89	46.16	96.82	89.04
Sample1014	299.26	44.2	100	99.9	46.55	97.44	90.23
Sample1015	333.45	18.09	100	99.85	43.48	97.41	89.98
Sample1016	396.38	32.35	100	99.83	44.33	97.44	90.56
Sample1017	620.91	27.74	100	99.94	45.36	97.28	90.17
Sample1018	301.47	18.29	100	99.8	43.06	97.07	89.12
Sample1019	191.79	20.44	100	99.81	43.56	97.22	89.95
Sample1020	300.18	24.28	100	99.81	43.72	97.4	90.22
Sample1021	299.87	19.26	100	99.78	42.94	97.27	89.97
Sample1022	276.82	41.72	100	99.86	46.67	97.41	90.19
Sample1023	280.15	40.75	100	99.86	47.14	97.33	89.94
Sample1024	310.62	38.8	100	99.87	44.97	97.54	90.31
Sample1025	410.88	25.57	100	99.93	43.77	96.86	89.03
Sample1026	265.45	17.74	100	99.77	42.98	97.04	88.97
Sample1027	509	37.59	100	99.85	46.09	94	83.21
Sample1028	274.52	25.77	99.99	99.74	44.45	97.15	89.48
Sample1029	392.35	42.03	100	99.92	46.74	96.64	87.89
Sample1030	182.25	31.36	100	99.47	44.88	96.75	89.97
Sample1031	151.2	42.03	100	99.95	46.2	96.61	88.03
Sample1032	298.62	41.64	100	99.89	47.09	97.31	89.7
Sample1033	360.12	21.49	100	99.89	43.66	96.75	88.3
Sample1034	325.13	34.12	100	99.89	45.19	97.29	90.12
Sample1035	323.14	27.47	100	99.67	43.9	97.4	90.42
Sample1036	233.76	32.45	100	99.82	45.31	97.07	89.27
Sample1037	239.11	21.93	99.99	99.79	43.48	96.72	88.75
Sample1038	234.38	24.45	100	99.87	43.36	97.46	90.27
Sample1039	406.48	42.51	100	99.91	46.22	96.96	89.14
Sample1040	195.91	31.82	100	99.91	45.59	96.97	89.16
Sample1041	112.11	18.08	100	99.07	42.54	95.75	86.11
Sample1042	298.23	40.44	100	99.84	46.08	97.09	89.63
Sample1043	318.39	24.18	100	99.8	43.36	96.97	89.32
Sample1044	254.46	21.45	100	99.74	43.54	96.46	88.09
Sample1045	323.25	22.57	100	99.88	43.48	97	89
Sample1046	231.88	26.25	99.99	99.46	45.06	94.69	84.64
Sample1047	206.86	19.84	99.98	99.61	42.91	97.62	90.58
Sample1048	388.95	15.27	100	99.82	42.59	97.47	90.55
Sample1049	443.54	32.85	100	99.88	45.02	97.29	90.06
Sample1050	690.7	43.34	100	99.92	46.06	96.56	88.34
Sample1051	342.95	17.27	100	99.8	42.28	97.65	90.69
Sample1052	482.26	37.84	100	99.95	45.8	96.92	88.76
Sample1053	268.04	23.33	100	99.72	43.36	97.08	89.46
Sample1054	303.7	35.85	100	99.84	45.01	97.17	89.57
Sample1055	337.33	29.96	100	99.78	45.08	96.23	88.29
Sample1056	303.14	28.36	100	99.6	44.55	96.81	86.87
Sample1057	134.91	23.31	100	99.87	43.85	97.25	89.71
Sample1058	250.4	34.54	100	99.9	45.65	97.03	89.15
Sample1059	281.44	42.89	100	99.75	47.09	96.88	88.81
Sample1060	351.98	30.87	100	99.91	44.66	97.49	90.66
Sample1061	402.81	27.33	100	99.78	44.23	97.06	89.69
Sample1062	188.36	26.96	100	99.75	44.69	96.75	88.23
Sample1063	370.51	21.29	100	99.93	43.07	95.83	87.09
Sample1064	372.33	43.2	100	99.88	45.8	95.42	85.43
Sample1065	150.86	24.5	100	99.88	43.47	96.34	87.67
Sample1066	237.82	28.35	100	99.65	44.76	96.69	89.73
Sample1067	274.6	28.12	100	99.71	43.69	97.08	89.63
Sample1068	307.34	24.12	100	99.88	44.26	97.36	90.18
Sample1069	226.66	17.11	100	99.75	43.04	97.44	90.33
Sample1070	178.76	17.7	100	99.75	42.25	97.64	90.59
Sample1071	221.66	27.48	100	99.85	44.6	97.52	90.47
Sample1072	403.5	24.05	100	99.73	43.83	97.19	89.97
Sample1073	231.68	40.13	100	99.78	46.29	96.94	88.88
Sample1074	487.5	33.98	100	99.88	45.42	96.96	89.32
Sample1075	244.17	38.35	100	99.92	46.65	96.63	88.34
Sample1076	238.06	42.08	100	99.94	46.65	96.94	89.27
Sample1077	624.69	36.41	100	99.94	45.39	97.43	90.57
Sample1078	359.81	18.74	100	99.84	43.29	97.25	89.94
Sample1079	465.73	17.93	100	99.86	42.4	97.26	89.88
Sample1080	290.07	33.82	100	99.79	44.74	95.66	86
Sample1081	343.67	33.56	100	99.92	45.92	97.06	89.19
Sample1082	322.55	30.57	100	99.73	45.15	97.16	89.41
Sample1083	128.84	36.39	100	99.83	46.93	96.82	88.64
Sample1084	239.27	43.26	100	99.63	45.85	96.94	89.26
Sample1085	172.92	21.73	100	99.78	43.79	97.33	89.92
Sample1086	405.36	39.17	100	99.92	45.71	96.98	89.05
Sample1087	355.19	40.9	100	99.84	46.78	96.36	87.17
Sample1088	489.94	16.02	100	99.91	42.34	97.38	90.12
Sample1089	310.69	27.49	100	99.74	43.6	98.02	92.06
Sample1090	327.97	25.23	100	99.82	43.71	96.19	87.39
Sample1091	541.57	28.44	100	99.92	44.49	97.23	89.71
Sample1092	275.95	38.24	100	99.84	46.37	96.54	87.81
Sample1093	504.35	42.69	100	99.91	46.09	96.36	87.88
Sample1094	530.18	19.28	100	99.92	43.17	97.45	90.32
Sample1095	465.19	42.5	100	99.93	46.68	97.1	89.6
Sample1096	406.98	38.92	100	99.82	45.17	96.24	88.27
Sample1097	307.88	31.19	100	99.89	46.15	97.01	89.44
Sample1098	452.37	21.39	100	99.94	44.1	96.4	87.91
Sample1099	223.15	29.42	100	99.75	44.32	97.7	90.88
Sample1100	331.84	29.73	100	99.84	44.8	97.16	89.35
Sample1101	263.25	40.49	100	99.89	46.46	96.62	88.32
Sample1102	347.14	23.17	100	99.78	43.45	97.57	90.93
Sample1103	337.34	30.6	100	99.83	45.61	97.24	89.97
Sample1104	252.55	38.43	100	99.88	46.83	96.27	87.41
Sample1105	332.67	31.93	100	99.89	44.99	96.66	88.34
Sample1106	259.66	39.22	100	99.88	46.59	96.62	88.11
Sample1107	285.28	27.47	100	99.88	44.52	97.52	90.8
Sample1108	195.46	33.22	100	99.86	45.56	96.44	88.06
Sample1109	374.48	26.66	100	99.9	44.84	97.41	90.29
Sample1110	218.81	23.26	100	99.8	44.36	96.73	86.73
Sample1111	260.89	37.32	100	99.9	46.61	97.19	90.12
Sample1112	349.4	15.83	100	99.85	42.89	97.09	89.7
Sample1113	382.99	38.42	100	99.87	46.89	96.76	88.9
Sample1114	292.2	44.84	99.99	99.88	47.36	97.8	89.82
Sample1115	240.73	40.1	99.99	99.77	46.84	97.76	89.16
Sample1116	406.02	45.02	100	99.94	47.13	98.06	90.97
Sample1117	399.63	44.59	100	99.94	47.04	97.93	90.33
Sample1118	169.84	49.07	99.94	99.34	46.98	97.12	89.06
Sample1119	205.73	48.69	99.99	99.84	47.32	97.6	89.5
Sample1120	231.28	46.12	99.99	99.88	47.44	98.02	90.96
Sample1121	268.98	24	99.99	99.86	43.72	97.79	90.12
Sample1122	354.08	43.26	99.99	99.87	48.06	98.28	91.71
Sample1123	346.2	43.74	99.99	99.85	48.35	98.2	91.01
Sample1124	324.76	43.73	100	99.84	48.08	98.39	92.07
Sample1125	368.7	33.18	100	99.83	47.03	98.64	92.5
Sample1126	275.08	46.33	100	99.88	47.72	98.39	91.88
Sample1127	346.64	46.31	99.99	99.89	47.67	98.16	91.17
Sample1128	345.05	45.29	99.99	99.9	47.51	98.17	91.32
Sample1129	431.96	46.25	100	99.94	47.93	98.4	92
Sample1130	397.91	46.27	100	99.88	48.44	98.36	91.97
Sample1131	445.72	45.51	100	99.91	48.32	98.27	91.25
Sample1132	475.3	40.69	100	99.92	47.53	98.41	92.05
Sample1133	481.59	46.55	99.99	99.9	49.07	98.5	92.25
Sample1134	432.19	42.53	100	99.93	47.45	98.39	92.19
Sample1135	369.08	42.3	100	99.91	47.43	98.01	90.69
Sample1136	371.94	39.38	100	99.92	47.05	98.08	91.02
Sample1137	389.8	45.48	100	99.92	47.8	98.27	91.83
Sample1138	307.15	41.51	100	99.87	47.81	97.59	88.84
Sample1139	321.31	34.5	100	99.86	46.03	98.34	91.84
Sample1140	334.95	39.46	100	99.9	46.6	98.19	91.42
Sample1141	363.92	39.78	99.99	99.89	47.33	98.33	91.43
Sample1142	354.92	47.72	99.99	99.91	48.13	98.02	91.1
Sample1143	455.43	45.09	100	99.94	48.4	98.57	92.64
Sample1144	509.13	45.08	100	99.92	48.49	98.16	90.68
Sample1145	551.91	43.46	100	99.93	48.58	98.4	91.64
Sample1146	230.07	35.63	99.99	99.86	46.16	96.83	88.44
Sample1147	212.49	44.7	100	99.89	48.1	97.98	90.48
Sample1148	274.45	42.13	99.99	99.89	48.22	97.71	89.21
Sample1149	247.41	42.57	100	99.9	47.98	97.81	89.44
Sample1150	179.72	44.68	99.99	99.84	48.23	98.13	90.84
Sample1151	261.01	22.9	99.99	99.83	44.91	96.38	85.99
Sample1152	224.68	26.34	100	99.85	45.48	97.14	88.58
Sample1153	266.15	40.3	100	99.9	47.4	96.44	87.63
Sample1154	283.38	40.2	99.99	99.89	47.31	96.68	87.77
Sample1155	147.88	47.36	99.95	99.3	47.74	96.49	86.23
Sample1156	173.84	46.49	99.97	99.62	48.28	97	88.32
Sample1157	148.03	47.99	99.97	99.59	47.43	96.92	88.63
Sample1158	270.62	49.31	99.99	99.88	46.41	96.67	88.38
Sample1159	241.17	49.37	99.99	99.81	47.16	96.89	88.8
Sample1160	162.98	29.73	99.99	99.81	44.81	97.68	89.89
Sample1161	144.58	24.77	100	99.72	44.04	97.55	89.51
Sample1162	302.56	41.29	100	99.92	47.33	98.06	91.33
Sample1163	241.99	33.05	100	99.89	45.57	97.76	90.14
Sample1164	156.56	35.86	99.99	99.51	45.83	97.8	90.34
Sample1165	200.71	37.34	100	99.75	45.05	97.92	90.73
Sample1166	286.12	47.33	100	99.9	47	97.67	89.76
Sample1167	191.71	33.13	100	99.8	45.31	97.66	89.94
Sample1168	380.5	38.77	100	99.93	45.16	97.66	89.75
Sample1169	164.19	39.24	100	99.54	46.21	97.6	89.37
Sample1170	261.55	37.43	100	99.72	45.87	97.45	88.15
Sample1171	270.7	46.67	100	99.86	45.84	97.88	90.05
