# Supplementary material for: Mutation characteristics of cancer susceptibility genes in Chinese ovarian cancer patients
Source: Front Oncol. 2024 May 16;14:1395818. doi: 10.3389/fonc.2024.1395818 (PMC11137316; doi:10.3389/fonc.2024.1395818)
Supplement: Supplementary file 8 [file Table_3.xlsx]

## Sheet: Sheet1
Table S3 The population frequency of mutations
Hugo_Symbol	HGVSc	HGVSp_Short	ExAC_AF	gnomAD_AF	SIFT	PolyPhen	Discrimination	Ovary_number	Ovary_ratio
MC1R	c.359T>C	p.I120T	0.003438	0.003064	deleterious(0.03)	possibly_damaging(0.597)	Harmful	137	0.116994
ERCC5	c.1586G>C	p.C529S	0.04376	0.04264	tolerated(1)	benign(0)	Benign	127	0.108454
PRSS1	c.72C>T	p.I24=	0.03534	0.001737			Unknown	127	0.108454
BARD1	c.1075_1095del	p.L359_P365del	0.0304	0.02873			Unknown	122	0.104184
KIT	c.1638A>G	p.K546=	0.02635	0.0274			Unknown	118	0.100769
FH	c.927G>A	p.P309=	0.03588	0.03473			Unknown	112	0.0956447
REV3L	c.9108T>C	p.Y3036=	0.002476	0.002351			Unknown	109	0.0930828
POLE	ENST00000320574.5:c.1323G>A	p.P441=	.	-	.	.	VUS	108	0.0922289
SLX4	c.3109T>C	p.L1037=	0.003164	0.003024			Unknown	99	0.0845431
RAD51C	c.195A>G	p.R65=	0.00306	0.002851			Unknown	97	0.0828352
MUTYH	c.1422G>C	p.T474=	0.00515	0.004548			Unknown	97	0.0828352
BRCA2	c.10234A>G	p.I3412V	0.02366	0.02298	tolerated(0.15)	benign(0.009)	Benign	94	0.0802733
KIF1B	c.2192A>G	p.N731S	0.00483	0.004736	deleterious(0)	probably_damaging(0.969)	Harmful	93	0.0794193
PRKDC	c.11073G>A	p.V3691=	0.002632	0.002295			Unknown	93	0.0794193
CDKN1B	c.165G>A	p.A55=	0.003427	0.003045			Unknown	91	0.0777114
PTCH1	c.2199A>G	p.S733=	0.01466	0.01451			Unknown	86	0.0734415
TP53BP1	c.4308A>G	p.P1436=	0.003663	0.003735			Unknown	83	0.0708796
FANCD2	c.2022-5C>T	-	0.001167	0.0002576			Unknown	83	0.0708796
POLE	c.4290+5C>T	-	0.02277	0.02383			Unknown	82	0.0700256
POLE	c.2340G>A	p.S780=	0.02282	0.02378			Unknown	81	0.0691716
ATRX	c.2540T>C	p.F847S	0.003239	0.002845	tolerated_low_confidence(0.31)	benign(0.003)	Benign	80	0.0683177
XRCC3	c.15A>G	p.L5=	0.001723	0.001584			Unknown	80	0.0683177
STK11	c.1062C>G	p.F354L	0.004691	0.005148	tolerated(0.26)	benign(0.022)	Benign	78	0.0666097
PRKDC	c.10681T>A	p.L3561M	0.006413	0.007298	deleterious(0)	probably_damaging(0.999)	Harmful	77	0.0657558
MLH1	c.1151T>A	p.V384D	0.002947	0.002587	deleterious(0)	probably_damaging(0.998)	Harmful	76	0.0649018
TP53BP1	c.3765C>T	p.V1255=	0.009331	0.009304			Unknown	75	0.0640478
TP53BP1	c.3535A>G	p.I1179V	0.00934	0.009345	tolerated(1)	benign(0)	Benign	75	0.0640478
BLM	c.1122T>C	p.H374=	0.008813	0.008212			Unknown	74	0.0631939
POLH	c.1433C>T	p.T478M	0.00161	0.001434	deleterious(0.02)	benign(0.328)	VUS	73	0.0623399
RAD54L	c.1299G>A	p.P433=	0.003258	0.00271			Unknown	72	0.0614859
POLD1	c.56G>A	p.R19H	0.004366	0.005274	deleterious(0)	benign(0)	VUS	70	0.059778
ENG	c.159C>T	p.C53=	0.001619	0.001507			Unknown	70	0.059778
FANCF	c.96C>T	p.R32=	0.01723	0.01978			Unknown	69	0.058924
MLH3	c.3488G>A	p.G1163D	0.002034	0.002099	tolerated(0.11)	benign(0.025)	Benign	68	0.05807
PMS2	c.1532C>T	p.T511M	0.009425	0.007837	tolerated(0.16)	benign(0.003)	Benign	66	0.0563621
FH	c.77C>T	p.P26L	0.0005778	0.002129	tolerated_low_confidence(0.23)	benign(0)	Benign	63	0.0538002
VHL	c.340+5G>C	-	0.01227	0.01244			Unknown	63	0.0538002
FANCE	c.1028G>A	p.R343Q	0.001893	0.00186	tolerated(1)	benign(0)	Benign	62	0.0529462
BUB1	c.279G>T	p.G93=	0.002269	0.002252			Unknown	62	0.0529462
MSH6	c.4068_4071dup	p.K1358Dfs*2	0.002429	0.002387			Unknown	62	0.0529462
GEN1	c.1341A>G	p.A447=	0.01639	0.01382			Unknown	62	0.0529462
GEN1	c.348+7A>G	-	0.01633	0.01411			Unknown	61	0.0520922
GEN1	c.607A>G	p.I203V	0.01644	0.0138	tolerated(1)	benign(0.017)	Benign	61	0.0520922
FANCA	c.115A>C	p.R39=	0.00306	0.002997			Unknown	61	0.0520922
GEN1	c.2619T>G	p.S873R	0.006167	0.00587	tolerated(0.46)	benign(0.001)	Benign	61	0.0520922
SDHA	c.163T>C	p.Y55H	0.001685	0.001484	deleterious_low_confidence(0.03)	benign(0.394)	VUS	60	0.0512383
ALK	c.3939-8A>G	-	0.001714	0.001549			Unknown	60	0.0512383
CDKN1C	c.708G>A	p.E236=	0.003817	0.003869			Unknown	59	0.0503843
FANCD2	c.1509C>T	p.N503=	0.01336	0.02895			Unknown	58	0.0495303
RAD52	c.1037C>A	p.S346*	0.01734	0.01651			Unknown	57	0.0486763
FANCM	c.4931G>A	p.R1644Q	0.001507	0.00164	deleterious(0)	probably_damaging(0.994)	Harmful	57	0.0486763
POLG	c.948G>A	p.K316=	0.004284	0.00435			Unknown	56	0.0478224
FANCI	c.2011A>G	p.I671V	0.004331	0.004381	tolerated(0.39)	benign(0.023)	Benign	56	0.0478224
RET	c.833C>A	p.T278N	0.002194	0.002113	tolerated(0.09)	benign(0.003)	Benign	56	0.0478224
FANCI	c.2604A>C	p.E868D	0.005032	0.004675	tolerated(1)	benign(0.001)	Benign	56	0.0478224
FANCI	c.3255+6dup	-	0.004322	0.004352			Unknown	55	0.0469684
MUTYH	c.53C>T	p.P18L	0.001224	0.001036	tolerated_low_confidence(0.21)	benign(0.003)	Benign	55	0.0469684
MUTYH	c.74G>A	p.G25D	0.001224	0.001035	tolerated_low_confidence(0.5)	benign(0.154)	Benign	55	0.0469684
AXIN2	c.2213C>T	p.S738F	0.001139	0.001007	tolerated(0.37)	benign(0.023)	Benign	53	0.0452605
SDHA	c.550G>A	p.G184R	0.001667	0.001519	deleterious_low_confidence(0)	possibly_damaging(0.749)	Harmful	53	0.0452605
FANCI	c.286G>A	p.E96K	0.001742	0.00171	deleterious(0)	probably_damaging(0.981)	Harmful	53	0.0452605
FAM175A	c.21G>A	p.S7=	0.008806	0.01126			Unknown	53	0.0452605
WRN	c.3237G>A	p.S1079=	0.002139	0.002046			Unknown	53	0.0452605
PTCH1	c.109G>C	p.G37R	0.001415	0.001406	tolerated_low_confidence(0.5)	benign(0)	Benign	52	0.0444065
CFTR	c.1365G>T	p.A455=	0.0005651	4.886e-05			Unknown	52	0.0444065
RPA1	c.48G>A	p.K16=	0.001092	0.00106			Unknown	52	0.0444065
WRN	c.1882C>G	p.L628V	0.001431	0.001281	tolerated(0.43)	benign(0.062)	Benign	51	0.0435525
PRKDC	c.11504C>T	p.P3835L	0.001925	0.001996	tolerated(0.41)	benign(0)	Benign	51	0.0435525
PTCH1	c.2913T>C	p.Y971=	0.0021	0.002023			Unknown	50	0.0426985
RET	c.1465G>A	p.D489N	0.0021	0.002159	tolerated(0.27)	benign(0.003)	Benign	50	0.0426985
KIF1B	c.2736C>T	p.D912=	0.001911	0.001553			Unknown	50	0.0426985
MSH2	c.1168C>T	p.L390F	0.001827	0.001531	deleterious(0.01)	benign(0.405)	VUS	49	0.0418446
RPS20	c.343T>C	p.S115P	0.01141	0.007806	tolerated(0.2)	benign(0.003)	Benign	49	0.0418446
NF1	c.8151G>A	p.P2717=	0.001732	0.001344			Unknown	49	0.0418446
SLX4	c.2786C>T	p.P929L	0.002166	0.002144	tolerated(0.6)	benign(0.001)	Benign	49	0.0418446
TRIM24	c.1970C>T	p.T657M	0.001299	0.001126	tolerated(0.18)	possibly_damaging(0.902)	VUS	48	0.0409906
REV3L	c.5909G>A	p.R1970H	0.02081	0.02206	tolerated(0.27)	benign(0)	Benign	48	0.0409906
PRSS1	c.255G>A	p.E85=	0.0348	0.0002624			Unknown	46	0.0392827
PRSS1	c.637G>A	p.V213I	0.004934	1.641e-05	tolerated(1)	benign(0.001)	Benign	46	0.0392827
FANCI	c.1893A>C	p.L631F	0.001732	0.001589	tolerated(0.26)	benign(0.082)	Benign	45	0.0384287
PRKDC	c.11376T>C	p.V3792=	0.001361	0.001474			Unknown	45	0.0384287
BAP1	c.288G>A	p.L96=	0.001196	0.001074			Unknown	45	0.0384287
BRCA1	c.2566T>C	p.Y856H	0.001629	0.001603	deleterious(0.01)	benign(0.328)	VUS	44	0.0375747
BUB1B	c.1649G>A	p.R550Q	0.001714	0.001531	tolerated(1)	benign(0)	Benign	44	0.0375747
SHFM1	c.15G>A	p.K5=	0.03559	0.0353			Unknown	44	0.0375747
EXT2	c.1740C>T	p.D580=	0.001516	0.001791			Unknown	44	0.0375747
MSH3	c.356C>T	p.S119F	0.001092	0.0009343	deleterious_low_confidence(0.02)	benign(0.063)	VUS	43	0.0367208
XRCC3	c.555C>T	p.A185=	0.0008987	0.001095			Unknown	43	0.0367208
EME1	c.981T>C	p.N327=	0.000885	0.0008975			Unknown	43	0.0367208
ERCC5	c.429C>G	p.L143=	0.01066	0.008662			Unknown	42	0.0358668
ACVRL1	c.817C>T	p.L273=	0.0007438	0.0007728			Unknown	42	0.0358668
ERCC5	c.640C>T	p.R214C	0.003003	0.002812	deleterious(0)	probably_damaging(1)	Harmful	42	0.0358668
ERCC5	c.767A>G	p.Q256R	0.01217	0.009905	deleterious(0.01)	probably_damaging(0.995)	Harmful	42	0.0358668
EME1	c.976G>A	p.D326N	0.001874	0.001734	tolerated(0.31)	benign(0)	Benign	41	0.0350128
PALLD	c.3256C>T	p.L1086=	0.002203	0.002136			Unknown	41	0.0350128
TRIM33	c.2491T>C	p.L831=	0.009152	0.007535			Unknown	41	0.0350128
PRKDC	c.9590C>G	p.T3197S	0.001837	0.001683	tolerated(0.95)	benign(0.007)	Benign	41	0.0350128
BUB1	c.1290T>C	p.H430=	0.001252	0.001146			Unknown	40	0.0341588
MSH2	c.23C>T	p.T8M	0.002013	0.002985	tolerated(0.12)	benign(0.226)	Benign	39	0.0333049
FANCD2	c.3446C>T	p.A1149V	0.001309	0.001192	tolerated(0.26)	benign(0.117)	Benign	39	0.0333049
BARD1	c.1972C>T	p.R658C	0.008031	0.008414	deleterious(0)	benign(0.362)	VUS	39	0.0333049
SLX4	c.3868C>A	p.H1290N	0.02621	0.03131	tolerated(0.57)	benign(0.045)	Benign	39	0.0333049
FANCC	c.973G>A	p.A325T	0.000838	0.0007309	tolerated(0.17)	possibly_damaging(0.532)	VUS	39	0.0333049
MSH2	c.1886A>G	p.Q629R	0.001384	0.001174	tolerated(0.4)	benign(0.003)	Benign	38	0.0324509
MEN1	c.209A>C	p.D70A	-	-	deleterious(0.05)	benign(0.025)	Benign	38	0.0324509
BRCA2	c.8187G>T	p.K2729N	0.0008568	0.0007578	deleterious(0)	probably_damaging(0.953)	Harmful	38	0.0324509
RAD54B	c.1778A>G	p.N593S	0.000885	0.0008577	deleterious(0.01)	probably_damaging(1)	Harmful	38	0.0324509
PRSS1	c.146G>T	p.G49V	0.04057	0.007491	deleterious(0)	probably_damaging(1)	Harmful	38	0.0324509
TSC2	c.856A>G	p.M286V	0.001768	0.001803	tolerated(0.28)	possibly_damaging(0.817)	VUS	37	0.0315969
MSR1	c.1014G>A	p.K338=	0.001516	0.00164			Unknown	37	0.0315969
ATR	c.5899-8del	-	0.0008478	0.0007728			Unknown	37	0.0315969
MSH6	c.3488A>T	p.E1163V	0.001215	0.0009872	deleterious(0)	benign(0.403)	VUS	37	0.0315969
POT1	c.1228G>C	p.D410H	0.0005367	0.0005168	deleterious(0.01)	benign(0.418)	VUS	36	0.030743
PRKDC	c.6335_6337del	p.G2112del	0.007736	0.00734			Unknown	36	0.030743
FANCD2	c.577A>G	p.T193A	0.006958	0.005956	tolerated(0.3)	benign(0.122)	Benign	35	0.029889
POLB	c.612A>T	p.S204=	0.0009133	0.0009584			Unknown	35	0.029889
GALNT12	c.719C>T	p.P240L	0.0004626	0.0005463	deleterious(0)	probably_damaging(0.943)	Harmful	35	0.029889
FANCM	c.1041G>A	p.P347=	0.005235	0.005838			Unknown	35	0.029889
FANCM	c.2749A>G	p.I917V	0.005227	0.00585	tolerated(0.51)	benign(0)	Benign	35	0.029889
FANCE	c.266G>T	p.R89L	0.0009604	0.0009425	tolerated(0.52)	benign(0.012)	Benign	34	0.029035
POLN	c.2562C>T	p.H854=	0.001357	0.001271			Unknown	34	0.029035
BRIP1	c.430G>A	p.A144T	0.001318	0.001422	tolerated(0.12)	possibly_damaging(0.89)	VUS	34	0.029035
ATR	c.325C>T	p.R109W	0.00134	0.001301	deleterious_low_confidence(0)	probably_damaging(0.998)	Harmful	33	0.028181
MLH1	c.1039-8T>A	-	0.001553	0.026			Unknown	33	0.028181
PTCH1	c.3387C>T	p.G1129=	0.001601	0.001715			Unknown	33	0.028181
MUS81	c.1228G>A	p.A410T	0.001431	0.00113	deleterious(0.04)	benign(0.078)	VUS	33	0.028181
ATM	c.4138C>T	p.H1380Y	0.01542	0.01214	tolerated(1)	benign(0)	Benign	33	0.028181
PTCH1	c.3907C>T	p.R1303C	0.001085	0.001003	tolerated_low_confidence(0.08)	benign(0.109)	Benign	33	0.028181
NBN	c.1690G>A	p.E564K	0.001026	0.0007847	deleterious(0)	benign(0.197)	VUS	32	0.0273271
MET	c.4159T>C	p.L1387=	0.0006051	0.0006304			Unknown	32	0.0273271
MC1R	c.200G>A	p.R67Q	0.0009519	0.0009229	deleterious(0.03)	benign(0.248)	VUS	32	0.0273271
NF1	c.7368A>G	p.K2456=	0.0004519	0.0004753			Unknown	31	0.0264731
RECQL4	c.2569_2574del	p.C857_T858del	0.003807	0.007391			Unknown	31	0.0264731
NF1	c.369C>G	p.T123=	0.0009509	0.0008168			Unknown	31	0.0264731
EXT1	c.1536+7G>A	-	0.001403	0.001343			Unknown	30	0.0256191
SLX4	c.3583_3585del	p.I1195del	0.0007344	0.0006052			Unknown	30	0.0256191
RAD52	c.467+7G>A	-	0.001761	0.001752			Unknown	30	0.0256191
RET	c.2944C>T	p.R982C	0.01955	0.01927	deleterious(0.01)	possibly_damaging(0.776)	Harmful	30	0.0256191
FANCD2	c.983G>A	p.R328Q	0.004331	0.004499	tolerated(0.86)	benign(0.003)	Benign	30	0.0256191
CEP57	c.807+8G>A	-	0.001111	0.001032			Unknown	29	0.0247652
BAP1	c.534C>T	p.G178=	0.0005178	0.0004346			Unknown	29	0.0247652
NCOA4	c.791A>G	p.N264S	0.005273	-	tolerated(1)	benign(0)	Benign	29	0.0247652
POLE	c.6494G>A	p.R2165H	0.006074	0.005857	deleterious(0.02)	possibly_damaging(0.616)	Harmful	29	0.0247652
EMSY	c.946A>G	p.T316A	0.0009509	0.0008487	deleterious(0.05)	benign(0.023)	Benign	28	0.0239112
BAP1	c.912C>A	p.A304=	0.0004614	0.0003902			Unknown	28	0.0239112
EPAS1	c.574-5C>G	-	0.0005461	0.0004997			Unknown	28	0.0239112
NCOA4	c.1532C>T	p.S511L	0.004275	-	deleterious(0.02)	possibly_damaging(0.849)	Harmful	28	0.0239112
NCOA4	c.1370G>A	p.G457E	0.004887	-	deleterious(0)	probably_damaging(0.999)	Harmful	28	0.0239112
REV3L	c.8285G>A	p.R2762Q	0.0008286	0.0009747	deleterious(0.04)	benign(0.025)	VUS	28	0.0239112
NCOA4	c.1572C>G	p.P524=	0.003992	0.004128			Unknown	28	0.0239112
MUTYH	c.925-2A>G	p.X309_splice	0.001092	0.001088			Unknown	28	0.0239112
ATM	c.2127T>C	p.I709=	0.001158	0.001307			Unknown	27	0.0230572
POLQ	c.7660-7dup	-	0.01839	0.01979			Unknown	27	0.0230572
NQO2	c.173-5G>A	-	0.003879	0.005105			Unknown	27	0.0230572
POLQ	c.16C>G	p.R6G	0.0007438	0.0006316	tolerated_low_confidence(0.05)	benign(0.182)	Benign	27	0.0230572
ELAC2	c.1621G>A	p.A541T	0.03406	0.03486	tolerated(0.14)	benign(0.254)	Benign	27	0.0230572
DIRC2	c.122T>G	p.V41G	-	-	tolerated_low_confidence(0.41)	benign(0)	Benign	27	0.0230572
NQO2	c.670A>G	p.T224A	0.0006214	0.0005839	tolerated(0.35)	benign(0)	Benign	26	0.0222032
RET	c.2037C>T	p.P679=	0.001215	0.001083			Unknown	26	0.0222032
ACVRL1	c.207C>T	p.C69=	0.001255	0.001632			Unknown	26	0.0222032
RET	c.200G>A	p.R67H	0.001045	0.001024	tolerated_low_confidence(0.6)	benign(0)	Benign	26	0.0222032
NF1	c.1933A>G	p.M645V	0.00113	0.001236	tolerated_low_confidence(0.34)	benign(0)	Benign	26	0.0222032
NCOA4	c.829C>T	p.L277F	0.0006591	-	deleterious(0)	probably_damaging(0.999)	Harmful	25	0.0213493
BRIP1	c.2440C>T	p.R814C	0.0004802	0.0004446	deleterious(0.02)	probably_damaging(1)	Harmful	25	0.0213493
PMS2	c.379G>A	p.A127T	0.000612	0.0004636	tolerated(0.62)	benign(0)	Benign	25	0.0213493
DIS3L2	c.1448G>A	p.R483Q	0.01229	0.01384	deleterious(0.01)	probably_damaging(0.971)	Harmful	25	0.0213493
HNF1A	c.1377G>A	p.L459=	0.0006498	0.0006243			Unknown	25	0.0213493
ALK	c.3035C>T	p.T1012M	0.0006967	0.000662	tolerated(0.36)	benign(0.114)	Benign	25	0.0213493
RECQL4	c.1115G>C	p.R372T	0.0003497	0.0003927	tolerated(0.3)	benign(0.139)	Benign	24	0.0204953
TSC2	c.2032G>A	p.A678T	0.0009046	0.001061	tolerated(0.47)	benign(0.005)	Benign	24	0.0204953
MSH2	c.471C>A	p.G157=	0.001073	0.001032			Unknown	24	0.0204953
PALB2	c.925A>G	p.I309V	0.003455	0.002772	tolerated(1)	benign(0)	Benign	24	0.0204953
BAP1	c.1002A>G	p.L334=	0.006685	0.005929			Unknown	24	0.0204953
PRSS1	c.8C>T	p.P3L	2.825e-05	-	tolerated(0.69)	benign(0)	Benign	24	0.0204953
XPC	c.1539G>C	p.M513I	0.001105	0.0009667	tolerated(1)	benign(0)	Benign	24	0.0204953
PTCH1	c.2479A>G	p.S827G	0.0007721	0.0009096	tolerated(0.27)	benign(0.013)	Benign	23	0.0196413
MLH3	c.2533A>G	p.S845G	0.01197	0.01085	tolerated(0.31)	benign(0)	Benign	23	0.0196413
PTCH1	c.2678G>A	p.R893H	0.0006308	0.0005767	tolerated(0.12)	possibly_damaging(0.735)	VUS	23	0.0196413
MLH3	c.666G>A	p.K222=	0.01494	0.01324			Unknown	23	0.0196413
PALLD	c.2199+5del	-	0.0006591	-			Unknown	23	0.0196413
ALK	c.2148C>T	p.S716=	0.0008756	0.0008259			Unknown	23	0.0196413
FANCC	c.816C>T	p.I272=	0.001205	0.001247			Unknown	23	0.0196413
ERCC4	c.241G>T	p.V81F	0.0005743	0.0006703	deleterious(0)	possibly_damaging(0.891)	Harmful	23	0.0196413
MLH3	c.2221G>T	p.V741F	0.01516	0.01337	tolerated(0.44)	possibly_damaging(0.516)	VUS	23	0.0196413
NQO2	c.551T>C	p.V184A	0.0009509	0.0009814	deleterious(0)	probably_damaging(0.956)	Harmful	23	0.0196413
CFTR	c.650A>G	p.E217G	0.004256	0.004683	tolerated(0.16)	benign(0.278)	Benign	23	0.0196413
EPCAM	c.458G>C	p.R153T	0.0007156	0.0006949	tolerated(0.2)	benign(0.241)	Benign	23	0.0196413
TSC2	c.1593C>T	p.I531=	0.001017	0.001012			Unknown	22	0.0187874
ALK	c.4573A>G	p.K1525E	0.0007815	0.0007318	tolerated(0.19)	benign(0.014)	Benign	22	0.0187874
RBBP8	c.1290T>A	p.T430=	0.0007915	0.0008541			Unknown	22	0.0187874
FAM175A	c.33G>C	p.S11=	0.0006722	0.0005907			Unknown	22	0.0187874
ATM	c.5793T>C	p.A1931=	0.004943	0.004953			Unknown	22	0.0187874
POLG	c.2890C>T	p.R964C	0.0006591	0.0006708	deleterious(0)	probably_damaging(0.999)	Harmful	22	0.0187874
ATRX	c.1825C>G	p.P609A	0.001083	0.00107	tolerated_low_confidence(0.34)	benign(0.024)	Benign	22	0.0187874
POT1	c.846C>T	p.N282=	0.001045	0.001116			Unknown	22	0.0187874
MEN1	c.1523G>A	p.G508D	0.0005338	0.000535	tolerated(0.59)	benign(0.038)	Benign	22	0.0187874
CFTR	c.374T>C	p.I125T	0.0006873	0.000688	deleterious(0.01)	benign(0.201)	VUS	22	0.0187874
ATM	c.4949A>G	p.N1650S	0.0005085	0.0005085	tolerated(1)	benign(0)	Benign	22	0.0187874
RET	c.341G>A	p.R114H	0.0009509	0.0007669	tolerated_low_confidence(0.13)	benign(0)	Benign	22	0.0187874
RHBDF2	c.633G>A	p.P211=	0.0009419	0.0008715			Unknown	21	0.0179334
ATM	c.6108T>C	p.Y2036=	0.0002354	0.0002437			Unknown	21	0.0179334
NQO2	c.471G>C	p.T157=	0.0006026	0.0004876			Unknown	21	0.0179334
RAD51D	c.330_331dup	p.K111Ifs*13	8.474e-05	-			Unknown	21	0.0179334
EXT2	c.995G>A	p.R332H	0.0005178	0.000557	deleterious(0.03)	probably_damaging(0.997)	Harmful	21	0.0179334
POLB	c.587C>G	p.T196S	0.0007815	0.0007066	tolerated(0.13)	benign(0.025)	Benign	21	0.0179334
APC	c.1488A>T	p.T496=	0.000499	0.0004389			Unknown	20	0.0170794
BRIP1	c.587A>G	p.N196S	0.0004425	0.0004997	tolerated(0.98)	benign(0.007)	Benign	20	0.0170794
BRCA1	c.5533_5540del	p.I1845Dfs*3	-	-			Unknown	20	0.0170794
AR	c.528C>A	p.S176R	0.0008499	0.0005944	deleterious_low_confidence(0)	possibly_damaging(0.8)	Harmful	20	0.0170794
ENG	c.1932C>T	p.I644=	0.01347	0.02821			Unknown	20	0.0170794
TERT	c.2520G>A	p.L840=	0.0009981	0.0009777			Unknown	20	0.0170794
PRKDC	c.6477C>T	p.Y2159=	0.004391	0.004453			Unknown	20	0.0170794
RECQL4	c.212A>G	p.E71G	0.01708	0.02366	deleterious(0.02)	possibly_damaging(0.691)	Harmful	20	0.0170794
NBN	c.1809C>A	p.F603L	0.0003484	0.0003625	tolerated(0.75)	benign(0)	Benign	20	0.0170794
TSC1	c.250G>A	p.A84T	0.0007061	0.0006966	tolerated(0.07)	benign(0.009)	Benign	19	0.0162254
EME2	c.282G>T	p.M94I	0.0002397	0.0005366	tolerated(0.36)	benign(0.013)	Benign	19	0.0162254
BUB1	c.1600A>G	p.N534D	0.0003955	0.0003085	deleterious(0.04)	benign(0.138)	VUS	19	0.0162254
PRSS1	c.12C>T	p.L4=	2.825e-05	-			Unknown	19	0.0162254
EPCAM	c.159A>C	p.A53=	0.001356	0.001341			Unknown	19	0.0162254
NQO2	c.86A>G	p.E29G	0.02418	0.02367	tolerated(0.1)	benign(0.396)	Benign	19	0.0162254
POLD1	c.1932C>G	p.D644E	0.0007438	0.0007723	tolerated(0.12)	benign(0.14)	Benign	19	0.0162254
SDHAF2	c.63A>G	p.L21=	0.0005932	0.0004792			Unknown	19	0.0162254
PTCH1	c.2222C>T	p.A741V	0.0006591	0.0006903	deleterious(0)	possibly_damaging(0.626)	Harmful	19	0.0162254
MUS81	c.1162G>A	p.V388I	0.0003484	0.0004103	tolerated(0.94)	benign(0.007)	Benign	19	0.0162254
FANCD2	c.2723C>T	p.T908I	0.0008756	0.0007482	tolerated(0.07)	benign(0.387)	Benign	19	0.0162254
RAD54B	c.792T>C	p.V264=	0.000951	0.0009057			Unknown	19	0.0162254
PRSS1	c.417C>T	p.C139=	0.0004143	0.0003737			Unknown	19	0.0162254
PRSS1	c.623G>C	p.G208A	0.0007156	0.000666	deleterious(0)	probably_damaging(0.938)	Harmful	18	0.0153715
ELAC2	c.1390A>T	p.R464W	0.0006967	0.0007352	deleterious(0)	possibly_damaging(0.844)	Harmful	18	0.0153715
MITF	c.1363C>A	p.L455I	0.0007815	0.0005488	tolerated(0.07)	possibly_damaging(0.736)	VUS	18	0.0153715
EME2	ENST00000568449.1:c.779+4C>T	p.X260_splice	.	-	.	.	VUS	18	0.0153715
MUTYH	c.1109C>T	p.A370V	0.0003672	0.0003659	tolerated(0.13)	benign(0.042)	Benign	18	0.0153715
POLH	c.1603A>G	p.K535E	0.001045	0.0008876	tolerated(0.17)	benign(0.058)	Benign	18	0.0153715
EPCAM	c.63C>G	p.A21=	0.0005894	0.0006077			Unknown	18	0.0153715
PRKDC	c.3729+1delinsCC	-	-	-			Unknown	18	0.0153715
POLQ	c.7743C>T	p.S2581=	0.0002354	0.0001724			Unknown	17	0.0145175
CDKN1C	c.600_611del	p.A213_P216del	-	-			Unknown	17	0.0145175
BRCA2	c.5785A>G	p.I1929V	0.001055	0.0008918	tolerated(0.74)	benign(0.005)	Benign	17	0.0145175
TMEM127	c.53C>T	p.P18L	0.0002207	0.000852	tolerated_low_confidence(0.25)	benign(0.007)	Benign	17	0.0145175
MEN1	c.527G>A	p.R176Q	0.01091	0.01202	tolerated(0.41)	possibly_damaging(0.661)	VUS	17	0.0145175
PPM1D	c.1435G>A	p.A479T	0.0004802	0.0005773	tolerated_low_confidence(0.47)	benign(0)	Benign	17	0.0145175
PALB2	c.3054G>C	p.E1018D	0.0003107	0.0003574	deleterious(0)	probably_damaging(0.988)	Harmful	17	0.0145175
REV3L	c.9086G>A	p.R3029Q	0.0004519	0.0003859	tolerated(0.09)	benign(0.07)	Benign	17	0.0145175
RNASEL	c.1905G>A	p.K635=	0.0004237	0.0004387			Unknown	16	0.0136635
RECQL4	c.901G>A	p.E301K	0.0006336	0.0006353	tolerated(0.13)	benign(0.043)	Benign	16	0.0136635
RECQL4	c.2131G>A	p.E711K	0.0005805	0.000642	deleterious(0.04)	benign(0.244)	VUS	16	0.0136635
WRN	c.1530A>T	p.E510D	0.0006968	0.0007291	tolerated(1)	benign(0)	Benign	16	0.0136635
MLH1	c.649C>T	p.R217C	0.0003295	0.0003579	deleterious(0)	probably_damaging(0.996)	Harmful	16	0.0136635
FANCL	c.685A>G	p.T229A	0.004943	0.004435	tolerated(0.06)	benign(0.399)	Benign	16	0.0136635
FANCC	c.1407G>A	p.T469=	0.0004802	0.0004307			Unknown	15	0.0128096
ATM	c.125A>G	p.H42R	0.0001977	0.000126	tolerated(0.47)	benign(0.057)	Benign	15	0.0128096
RAD54B	c.2332A>G	p.I778V	0.0004519	0.0004286	tolerated(0.08)	possibly_damaging(0.471)	VUS	15	0.0128096
MLH1	c.1039-8_1039-7insTA	-	0.0001553	0.0002534			Unknown	15	0.0128096
MET	c.4141G>A	p.A1381T	0.0004728	0.0003944	tolerated(0.75)	benign(0.062)	Benign	15	0.0128096
ATR	c.2688G>A	p.L896=	0.0009321	0.0005727			Unknown	15	0.0128096
BMPR1A	c.777G>A	p.A259=	0.0009228	0.0008109			Unknown	15	0.0128096
CFTR	c.4056G>C	p.Q1352H	0.0008568	0.000992	deleterious(0)	probably_damaging(1)	Harmful	15	0.0128096
GPC3	c.1700C>T	p.P567L	0.0003201	0.0003198	tolerated(0.62)	benign(0.01)	Benign	15	0.0128096
POLN	c.2643del	p.S883Pfs*75	0.0005838	0.0004825			Unknown	14	0.0119556
RHBDF2	c.1896+7C>T	-	0.002636	0.002952			Unknown	14	0.0119556
TSC2	c.291C>G	p.A97=	0.0003611	0.0005934			Unknown	14	0.0119556
POLD1	c.371T>C	p.V124A	0.0002354	0.000228	tolerated(0.14)	benign(0.051)	Benign	14	0.0119556
BRCA2	c.943T>A	p.C315S	0.0003673	0.000381	tolerated(0.35)	benign(0.137)	Benign	14	0.0119556
CDH1	c.1888C>G	p.L630V	0.0004143	0.0003858	deleterious(0.04)	probably_damaging(0.998)	Harmful	14	0.0119556
NBN	c.2220T>C	p.A740=	0.0005179	0.0005391			Unknown	14	0.0119556
PALLD	c.2784T>C	p.P928=	0.0002636	0.0002724			Unknown	14	0.0119556
RECQL4	c.1391-4G>T	-	0.000104	0.0001527			Unknown	14	0.0119556
PALLD	c.3359-4G>A	-	0.00903	0.00843			Unknown	14	0.0119556
POLB	c.410G>A	p.R137Q	0.001281	0.001385	tolerated(0.56)	benign(0)	Benign	14	0.0119556
FANCA	c.2101A>G	p.K701E	0.0004425	0.0005644	tolerated(0.52)	benign(0.007)	Benign	14	0.0119556
TSC2	c.5028G>A	p.L1676=	0.0004614	0.0004077			Unknown	13	0.0111016
ACVRL1	c.652C>T	p.R218W	0.0003954	0.0003547	deleterious(0)	probably_damaging(1)	Harmful	13	0.0111016
TSC1	c.615T>C	p.S205=	0.0005649	0.0005527			Unknown	13	0.0111016
POLH	c.-5+3A>G	-	-	-			Unknown	13	0.0111016
CFTR	c.2042A>T	p.E681V	0.0001601	0.000131	deleterious(0.01)	possibly_damaging(0.704)	Harmful	13	0.0111016
MUS81	c.303T>C	p.S101=	-	-			Unknown	13	0.0111016
CHEK1	c.1170T>C	p.Y390=	0.0002825	0.0002883			Unknown	13	0.0111016
POLQ	c.5774-6_5774-5dup	-	0.0005509	0.001388			Unknown	13	0.0111016
PHOX2B	c.669T>C	p.A223=	-	-			Unknown	13	0.0111016
MC1R	c.497C>G	p.A166G	0.000179	0.0002847	tolerated(0.21)	benign(0.06)	Benign	12	0.0102477
CTNNB1	c.1155C>A	p.L385=	0.0005178	0.0003942			Unknown	12	0.0102477
WRN	c.16T>C	p.L6=	0.0003107	0.0002896			Unknown	12	0.0102477
RAD51D	c.992T>A	p.I331N	0.0004896	0.0004386	deleterious(0)	possibly_damaging(0.471)	Harmful	12	0.0102477
XPC	c.939C>T	p.T313=	0.0003449	0.0005128			Unknown	12	0.0102477
ATRX	c.4224G>A	p.K1408=	8.474e-05	0.0001128			Unknown	12	0.0102477
TSC2	c.4968C>T	p.D1656=	0.0003961	0.0004271			Unknown	12	0.0102477
AXIN2	c.1242G>A	p.R414=	0.0003305	0.0003416			Unknown	12	0.0102477
ERCC2	c.691G>A	p.V231M	0.0001318	0.0001181	deleterious(0)	probably_damaging(0.983)	Harmful	12	0.0102477
DIS3L2	c.426C>T	p.P142=	0.01049	0.01145			Unknown	12	0.0102477
MSH2	c.505A>G	p.I169V	0.0005743	0.000467	tolerated(0.6)	benign(0.003)	Benign	12	0.0102477
MSH3	c.195_203dup	p.P67_P69dup	0.005181	0.009392			Unknown	12	0.0102477
POLQ	c.2566C>T	p.R856C	0.0001506	0.0001585	deleterious(0.01)	probably_damaging(0.999)	Harmful	12	0.0102477
PRSS1	c.30G>T	p.V10=	9.415e-06	-			Unknown	12	0.0102477
ALK	c.2676C>T	p.A892=	0.001996	0.002259			Unknown	12	0.0102477
POLQ	c.1151A>T	p.Q384L	0.0001506	0.0001445	tolerated(0.13)	benign(0.005)	Benign	12	0.0102477
ATR	c.117A>G	p.Q39=	0.0005085	0.0005859			Unknown	12	0.0102477
REV3L	c.3659C>T	p.S1220L	0.0337	0.0313	deleterious_low_confidence(0.03)	benign(0.024)	VUS	12	0.0102477
RBBP8	c.1242A>T	p.E414D	0.0003486	0.0003705	tolerated(0.05)	benign(0.037)	Benign	11	0.00939368
BUB1B	c.1920G>A	p.P640=	0.0002448	0.0002031			Unknown	11	0.00939368
PMS2	c.706-5_706-4dup	-	0.002406	0.003439			Unknown	11	0.00939368
APC	c.3374T>C	p.V1125A	0.0006214	0.0006113	tolerated_low_confidence(0.18)	benign(0.003)	Benign	11	0.00939368
BRCA1	c.981_982del	p.C328*	-	-			Unknown	11	0.00939368
XPC	c.203A>T	p.D68V	0.0003502	0.0002885	deleterious_low_confidence(0.04)	benign(0.015)	VUS	11	0.00939368
CEP57	c.985A>G	p.S329G	0.0001412	0.0001706	tolerated(0.17)	benign(0.024)	Benign	11	0.00939368
TERT	c.1138C>T	p.P380S	0.0004202	0.0007587	tolerated(0.19)	benign(0.009)	Benign	11	0.00939368
PRKDC	c.8040C>T	p.A2680=	0.0001509	0.0001706			Unknown	11	0.00939368
SMARCA4	c.602A>T	p.Q201L	0.0001636	0.0001481	tolerated(0.12)	probably_damaging(0.932)	VUS	11	0.00939368
FH	c.1482A>G	p.A494=	9.417e-05	7.742e-05			Unknown	11	0.00939368
ALK	c.846C>T	p.D282=	9.415e-05	9.773e-05			Unknown	11	0.00939368
ERCC5	c.1880C>A	p.A627E	0.006798	0.007819	tolerated(0.17)	benign(0.216)	Benign	11	0.00939368
PTCH2	c.1533C>T	p.A511=	0.0002448	0.0002325			Unknown	11	0.00939368
CFTR	c.91C>T	p.R31C	0.001619	0.001653	deleterious(0.01)	possibly_damaging(0.677)	Harmful	11	0.00939368
DIS3L2	c.1488T>C	p.H496=	0.01117	0.01226			Unknown	11	0.00939368
DIS3L2	c.2187C>T	p.P729=	0.03076	0.03091			Unknown	11	0.00939368
MSH2	c.1255C>A	p.Q419K	0.0006873	0.0005445	tolerated(0.39)	benign(0.005)	Benign	11	0.00939368
PALB2	c.1492G>T	p.D498Y	0.0005555	0.0004467	deleterious(0.01)	possibly_damaging(0.772)	Harmful	11	0.00939368
SPINK1	c.194+2T>C	p.X65_splice	0.0002825	0.0003077			Unknown	11	0.00939368
TP53BP1	c.5306-8dup	-	0.01053	0.02669			Unknown	11	0.00939368
BLM	c.178T>A	p.L60I	0.0003484	0.0002481	deleterious(0.03)	probably_damaging(0.987)	Harmful	11	0.00939368
TSC2	c.5068+27_5069-47del	p.X1690_splice	0.002279	0.002049			Unknown	11	0.00939368
EGFR	c.2175G>A	p.T725=	0.000339	0.0002884			Unknown	11	0.00939368
SLX4	c.2235C>T	p.T745=	0.0003954	0.000452			Unknown	11	0.00939368
FANCG	c.373_375dup	p.V125dup	0.0001601	0.0001668			Unknown	11	0.00939368
POLG	c.128A>G	p.Q43R	0.005164	0.005184	tolerated(0.51)	benign(0)	Benign	11	0.00939368
GEN1	c.314C>G	p.T105R	7.532e-05	8.242e-05	deleterious(0.04)	benign(0.009)	VUS	11	0.00939368
BLM	c.2293G>A	p.V765I	0.0003958	0.0003367	deleterious(0)	possibly_damaging(0.693)	Harmful	10	0.00853971
EXT1	c.1457C>T	p.A486V	0.0002636	0.0002317	tolerated(0.92)	benign(0.015)	Benign	10	0.00853971
TP53BP1	c.5155G>T	p.A1719S	0.0009886	0.0008411	tolerated(0.06)	benign(0.053)	Benign	10	0.00853971
SMARCA4	c.3738C>T	p.F1246=	0.0007815	0.0007806			Unknown	10	0.00853971
PRSS1	c.410C>T	p.T137M	0.0006685	0.0006541	deleterious(0.03)	probably_damaging(0.966)	Harmful	10	0.00853971
POLQ	c.4008A>G	p.A1336=	0.0003201	0.0002439			Unknown	10	0.00853971
POLE	c.123G>A	p.T41=	0.001422	0.001153			Unknown	10	0.00853971
HRAS	c.369C>T	p.R123=	0.000113	0.0001422			Unknown	10	0.00853971
TRIM33	c.227A>C	p.Q76P	-	0.0002353	tolerated_low_confidence(0.3)	benign(0)	Benign	10	0.00853971
MSH2	c.2425G>A	p.E809K	0.0003295	0.0002641	tolerated(0.36)	benign(0.012)	Benign	10	0.00853971
MRE11A	c.469A>G	p.M157V	0.0001695	0.0001668	tolerated(0.28)	benign(0.001)	Benign	10	0.00853971
MSH3	c.3181A>G	p.R1061G	0.000226	0.0002074	tolerated(0.07)	benign(0.007)	Benign	10	0.00853971
MSH3	c.173C>T	p.A58V	0.001428	0.00123	tolerated_low_confidence(0.25)	benign(0.001)	Benign	10	0.00853971
PTCH1	c.2560+7C>T	-	0.0005461	0.0005001			Unknown	10	0.00853971
CFTR	c.3659C>T	p.T1220I	0.0001318	9.8e-05	tolerated(0.52)	benign(0)	Benign	10	0.00853971
GPC3	c.972T>C	p.F324=	0.0001601	0.00014			Unknown	10	0.00853971
TP53BP1	c.37T>C	p.L13=	0.0002636	0.0002235			Unknown	10	0.00853971
RNASEL	c.195C>A	p.N65K	0.0002919	0.0002654	tolerated(0.06)	possibly_damaging(0.838)	VUS	10	0.00853971
ELAC2	c.1928G>A	p.R643Q	0.000113	0.0001178	tolerated(0.11)	benign(0.164)	Benign	9	0.00768574
ACVRL1	c.993C>T	p.F331=	0.0003766	0.0004242			Unknown	9	0.00768574
SLX4	c.73G>A	p.G25R	0.0002448	0.0002234	tolerated_low_confidence(0.77)	benign(0)	Benign	9	0.00768574
RAD54L	c.1748T>C	p.I583T	0.0004802	0.0004308	deleterious(0)	probably_damaging(0.94)	Harmful	9	0.00768574
MSH6	c.4001+12_4001+15del	p.X1334_splice	0.001271	0.001225			Unknown	9	0.00768574
CDK12	c.3573A>G	p.S1191=	4.708e-05	4.469e-05			Unknown	9	0.00768574
RET	c.1596C>T	p.G532=	6.698e-05	6.146e-05			Unknown	9	0.00768574
MLH1	c.1039-6dup	-	0.01793	0.0001605			Unknown	9	0.00768574
ALK	c.1111G>A	p.A371T	0.0003107	0.000252	tolerated(0.75)	benign(0.003)	Benign	9	0.00768574
SLX4	c.3315C>T	p.S1105=	0.0005367	0.0005482			Unknown	9	0.00768574
PRSS1	c.161A>G	p.N54S	0.03441	0.0002348	tolerated(0.86)	benign(0)	Benign	9	0.00768574
SMARCA4	c.4872G>A	p.P1624=	8.352e-05	0.0001079			Unknown	9	0.00768574
PRSS1	c.121C>T	p.L41=	0.004849	0.0001089			Unknown	9	0.00768574
DIRC2	c.120G>A	p.A40=	0.0002602	0.0002424			Unknown	9	0.00768574
POLD1	c.3218+5G>A	-	0.0002176	0.0002124			Unknown	9	0.00768574
BRCA2	c.6325G>A	p.V2109I	0.0003013	0.0002287	tolerated(0.73)	benign(0.001)	Benign	9	0.00768574
TSC1	c.1960C>G	p.Q654E	0.0008662	0.0007883	tolerated(0.07)	benign(0.015)	Benign	9	0.00768574
ALK	c.487G>T	p.V163L	0.000311	0.0003416	tolerated_low_confidence(0.08)	benign(0.01)	Benign	9	0.00768574
TRIM24	c.2719-6G>A	-	0.0002354	0.0001938			Unknown	9	0.00768574
TSC2	c.3475C>T	p.R1159W	0.0004331	0.0003831	deleterious(0.01)	benign(0.226)	VUS	9	0.00768574
TSC1	c.3324C>T	p.G1108=	0.01558	0.01841			Unknown	9	0.00768574
EGFR	c.2457G>A	p.V819=	0.000386	0.0004467			Unknown	9	0.00768574
MLH3	c.484A>G	p.M162V	0.0001601	0.00013	deleterious(0.03)	benign(0.031)	VUS	9	0.00768574
PRSS1	c.202C>T	p.R68C	0.00644	0.0002153	deleterious(0.04)	benign(0.07)	VUS	8	0.00683177
TSC1	c.1631G>A	p.G544E	5.649e-05	3.251e-05	tolerated(0.13)	probably_damaging(0.971)	VUS	8	0.00683177
PTCH2	c.840T>C	p.S280=	0.005207	0.005401			Unknown	8	0.00683177
POLG	c.150_158del	p.Q53_Q55del	0.001885	-			Unknown	8	0.00683177
RECQL4	c.3133G>A	p.A1045T	0.00121	0.001069	tolerated(0.59)	benign(0.342)	Benign	8	0.00683177
PRKDC	c.3045T>C	p.D1015=	7.575e-05	5.186e-05			Unknown	8	0.00683177
TP53BP1	c.5696C>G	p.T1899S	0.0001318	0.0001992	deleterious(0.05)	benign(0.344)	Benign	8	0.00683177
FANCA	c.1573A>G	p.I525V	7.532e-05	0.0001056	tolerated(0.27)	benign(0.007)	Benign	8	0.00683177
RAD51C	c.571+5G>A	-	2.825e-05	1.625e-05			Unknown	8	0.00683177
SMARCA4	c.1557C>T	p.N519=	0.0003295	0.0002445			Unknown	8	0.00683177
BRCA2	c.7188G>A	p.L2396=	7.532e-05	8.534e-05			Unknown	8	0.00683177
RPA1	c.1069A>T	p.T357S	0.0001601	0.0001625	tolerated(0.38)	benign(0)	Benign	8	0.00683177
BRCA1	c.795T>C	p.S265=	0.000226	0.0002127			Unknown	8	0.00683177
POLE	c.2974G>A	p.A992T	0.0003484	0.000333	tolerated(0.06)	benign(0.015)	Benign	8	0.00683177
POLH	c.104C>T	p.A35V	0.000226	0.0002518	tolerated(0.48)	benign(0.25)	Benign	8	0.00683177
EXT2	c.107C>T	p.A36V	0.0001695	0.000191	deleterious_low_confidence(0.01)	possibly_damaging(0.703)	Harmful	8	0.00683177
SMARCA4	c.2739G>A	p.P913=	0.0001318	0.0001708			Unknown	8	0.00683177
POLG	c.3650C>T	p.A1217V	4.708e-05	6.909e-05	deleterious(0)	probably_damaging(0.996)	Harmful	8	0.00683177
BLM	c.2371C>T	p.R791C	0.0001601	0.0001259	deleterious(0.03)	probably_damaging(0.932)	Harmful	8	0.00683177
ATR	c.7667C>G	p.T2556S	0.0004237	0.0003412	tolerated(0.17)	possibly_damaging(0.586)	VUS	8	0.00683177
TSHR	c.915T>A	p.S305R	0.0002354	0.000236	tolerated(0.4)	possibly_damaging(0.648)	VUS	8	0.00683177
CDK4	c.306A>G	p.T102=	0.000226	0.0002233			Unknown	8	0.00683177
HMMR	c.2001dup	p.Q668Tfs*3	0.001026	0.001634			Unknown	8	0.00683177
FANCD2	c.195G>C	p.Q65H	0.003072	0.002638	tolerated(0.07)	probably_damaging(0.976)	VUS	8	0.00683177
POLG	c.2541C>T	p.A847=	0.0006873	0.0004873			Unknown	8	0.00683177
XPC	c.572G>A	p.R191Q	0.0001798	0.0001519	tolerated(0.06)	probably_damaging(0.998)	VUS	8	0.00683177
PRKDC	c.12318G>A	p.L4106=	0.000123	0.0001613			Unknown	8	0.00683177
PTCH1	c.2692G>A	p.D898N	0.0002542	0.000199	tolerated(0.74)	benign(0.08)	Benign	8	0.00683177
POLE	c.5496T>C	p.L1832=	0.0007532	0.0006498			Unknown	8	0.00683177
SUFU	c.1445C>T	p.P482L	0.0002166	0.000199	tolerated_low_confidence(0.2)	probably_damaging(0.982)	VUS	8	0.00683177
HOXB13	c.832G>T	p.V278L	0.0002636	0.0002599	tolerated(1)	benign(0.014)	Benign	8	0.00683177
ATRX	c.2806G>C	p.V936L	0.000113	0.0001348	tolerated_low_confidence(0.35)	benign(0.001)	Benign	8	0.00683177
PRKDC	c.11374G>A	p.V3792I	0.0001796	0.0002057	deleterious(0.01)	benign(0.232)	VUS	8	0.00683177
CDKN1C	c.670G>A	p.A224T	0.0001779	0.0001379	tolerated_low_confidence(0.07)	benign(0.01)	Benign	7	0.0059778
ELAC2	c.1880C>T	p.S627L	0.0003578	0.0003127	tolerated(0.3)	benign(0.009)	Benign	7	0.0059778
CHEK2	c.1240C>T	p.H414Y	0.000537	0.0004545	deleterious(0.02)	benign(0.009)	VUS	7	0.0059778
PTCH2	c.1272C>T	p.S424=	7.534e-05	8.996e-05			Unknown	7	0.0059778
STK11	c.723T>C	p.A241=	0.0001609	0.0001757			Unknown	7	0.0059778
POLD1	c.2275G>A	p.V759I	0.001657	0.001848	deleterious(0)	probably_damaging(0.988)	Harmful	7	0.0059778
HMMR	c.1853A>C	p.Q618P	3.766e-05	6.596e-05	deleterious(0)	benign(0.122)	VUS	7	0.0059778
RAD51D	c.155C>T	p.A52V	0.0002942	0.0004614	deleterious(0.02)	possibly_damaging(0.891)	Harmful	7	0.0059778
CTNNB1	c.1653G>A	p.T551=	0.0001318	0.0001463			Unknown	7	0.0059778
BLM	c.1044G>A	p.M348I	0.0002448	0.000228	tolerated(0.36)	benign(0.038)	Benign	7	0.0059778
EPAS1	c.1035-6C>G	-	0.0003107	0.0003331			Unknown	7	0.0059778
PALLD	c.2723G>A	p.R908H	0.0002354	0.0002358	deleterious(0)	probably_damaging(0.974)	Harmful	7	0.0059778
TSC2	c.1939G>A	p.D647N	0.0004049	0.0003218	deleterious(0.01)	probably_damaging(0.995)	Harmful	7	0.0059778
PTCH2	c.311T>C	p.L104P	0.0003013	0.0002885	deleterious(0)	probably_damaging(0.929)	Harmful	7	0.0059778
TP53BP1	c.1570A>G	p.T524A	0.0005084	0.0006012	tolerated(1)	benign(0.001)	Benign	7	0.0059778
POLN	c.506G>A	p.S169N	0.0001318	9.373e-05	deleterious(0.05)	benign(0.395)	Benign	7	0.0059778
SMARCB1	c.1116G>A	p.T372=	0.0003672	0.0003291			Unknown	7	0.0059778
RET	c.874G>A	p.V292M	0.0005367	0.0005666	deleterious(0.01)	probably_damaging(0.935)	Harmful	7	0.0059778
BLM	c.2839A>G	p.I947V	0.000226	0.0002112	tolerated(0.1)	benign(0.139)	Benign	7	0.0059778
DMC1	c.863T>C	p.I288T	0.0007721	0.000869	deleterious(0.02)	possibly_damaging(0.772)	Harmful	7	0.0059778
FANCM	c.4709G>A	p.R1570H	0.0003673	0.0002729	tolerated(0.32)	benign(0.003)	Benign	7	0.0059778
CDK4	c.763C>T	p.R255C	5.649e-05	4.877e-05	tolerated(0.07)	benign(0.015)	Benign	7	0.0059778
ERCC3	c.2203T>C	p.S735P	0.000273	0.0002112	tolerated(0.24)	benign(0)	Benign	7	0.0059778
AXIN2	c.2140C>T	p.R714W	0.0003108	0.0002585	deleterious(0)	probably_damaging(0.996)	Harmful	7	0.0059778
RAD51	c.290G>A	p.R97H	-	5.931e-05	deleterious(0.05)	probably_damaging(0.948)	VUS	7	0.0059778
FANCI	c.3055C>T	p.R1019W	0.0002636	0.0002396	tolerated(0.23)	benign(0.001)	Benign	7	0.0059778
RAD51	c.648-7C>G	-	0.0002448	0.0002762			Unknown	7	0.0059778
NF2	ENST00000338641.4:c.1113C>T	p.N371=	.	-	.	.	VUS	7	0.0059778
NCOA4	c.1886A>C	p.Q629P	0.0008568	-	deleterious(0)	probably_damaging(0.986)	Harmful	7	0.0059778
CHEK2	c.667C>T	p.R223C	0.001469	0.0009991	deleterious(0)	benign(0.14)	VUS	7	0.0059778
EME1	c.1640G>A	p.R547H	0.0003672	0.0003817	deleterious(0.04)	probably_damaging(0.999)	Harmful	7	0.0059778
HNF1A	c.264G>A	p.E88=	0.0002261	0.0001476			Unknown	7	0.0059778
BAP1	c.2013C>T	p.Y671=	7.532e-05	0.0001137			Unknown	7	0.0059778
POLG	c.3482+6C>G	-	6.591e-05	6.107e-05			Unknown	7	0.0059778
TSHR	c.1377G>A	p.A459=	0.01826	0.01819			Unknown	7	0.0059778
POLE	c.1740C>T	p.H580=	0.0002354	0.0002274			Unknown	7	0.0059778
POLQ	c.7037G>A	p.R2346H	9.415e-05	9.754e-05	tolerated(0.53)	benign(0.005)	Benign	7	0.0059778
FANCD2	c.1470T>C	p.D490=	0.000226	0.0001017			Unknown	7	0.0059778
SLX1A	c.345G>A	p.A115=	-	0.0006776			Unknown	7	0.0059778
RAD50	c.1211A>G	p.Q404R	0.0001507	0.0001953	tolerated(0.19)	benign(0.07)	Benign	7	0.0059778
MLH1	c.2101C>A	p.Q701K	0.0004896	0.0004604	tolerated(0.48)	benign(0.02)	Benign	7	0.0059778
ERCC4	c.2700C>T	p.F900=	0.000113	0.0001262			Unknown	7	0.0059778
BRCA2	c.7469T>C	p.I2490T	0.01586	0.01926	tolerated(0.23)	benign(0.001)	Benign	7	0.0059778
FANCI	c.1111A>G	p.S371G	0.0002072	0.0002279	deleterious(0)	possibly_damaging(0.689)	Harmful	6	0.00512383
KIT	c.2263G>A	p.A755T	6.591e-05	6.095e-05	tolerated(0.15)	possibly_damaging(0.472)	VUS	6	0.00512383
XPC	c.2633C>G	p.A878G	0.0001324	0.0001035	tolerated(0.37)	benign(0.001)	Benign	6	0.00512383
MSH3	c.189_190insGCAGCGCCCCCAGCGCCC	p.P63_P64insAAPPAP	-	-			Unknown	6	0.00512383
BRCA2	c.6322C>T	p.R2108C	0.0006027	0.0005928	tolerated(0.18)	benign(0)	Benign	6	0.00512383
TP53BP1	c.4270C>G	p.P1424A	0.0001132	9.484e-05	tolerated(0.85)	possibly_damaging(0.697)	VUS	6	0.00512383
POLD1	c.1594G>A	p.A532T	8.474e-05	9.769e-05	deleterious(0.01)	benign(0.001)	VUS	6	0.00512383
ATR	c.6279A>G	p.L2093=	5.652e-05	4.49e-05			Unknown	6	0.00512383
MSH3	c.162_170dup	p.A60_A62dup	0.0001812	0.0001786			Unknown	6	0.00512383
POLQ	c.4995T>C	p.F1665=	0.0002072	0.0002146			Unknown	6	0.00512383
EXT2	c.300G>A	p.P100=	0.0001883	0.0002194			Unknown	6	0.00512383
PMS1	c.2417C>G	p.T806S	0.002297	0.001854	tolerated(0.59)	benign(0.007)	Benign	6	0.00512383
ERCC5	c.2108A>G	p.D703G	0.0003766	0.0002844	tolerated(0.15)	benign(0.006)	Benign	6	0.00512383
PRKDC	c.6322G>A	p.G2108S	0.0002363	0.0002888	tolerated(0.2)	benign(0.001)	Benign	6	0.00512383
MSH3	c.178_186dup	p.A60_A62dup	0.006285	0.003817			Unknown	6	0.00512383
MDH2	c.572G>C	p.R191P	4.708e-05	5.279e-05	tolerated(0.06)	possibly_damaging(0.654)	VUS	6	0.00512383
PMS1	c.2358T>C	p.S786=	0.0001412	0.0001917			Unknown	6	0.00512383
PTCH1	c.3839C>T	p.S1280L	0.0002264	0.0002203	tolerated_low_confidence(0.25)	benign(0)	Benign	6	0.00512383
CDK12	c.2960C>T	p.S987F	0.000113	0.0001508	deleterious(0.01)	possibly_damaging(0.876)	Harmful	6	0.00512383
RET	c.2001A>T	p.P667=	6.591e-05	6.513e-05			Unknown	6	0.00512383
ALK	c.3336G>A	p.P1112=	0.000612	0.0004879			Unknown	6	0.00512383
AXIN2	c.2011C>T	p.R671C	1.884e-05	3.341e-05	tolerated(0.13)	possibly_damaging(0.847)	VUS	6	0.00512383
BUB1	c.880G>A	p.D294N	8.475e-05	5.719e-05	deleterious(0.03)	benign(0.062)	VUS	6	0.00512383
PTCH2	c.3589G>A	p.G1197R	0.000339	0.000293	deleterious_low_confidence(0)	benign(0.013)	VUS	6	0.00512383
MUTYH	c.1440C>T	p.T480=	0.003587	0.002956			Unknown	6	0.00512383
TSC1	c.1460C>G	p.S487C	0.0004333	0.0004408	deleterious(0.02)	probably_damaging(0.979)	Harmful	6	0.00512383
POLG	c.1600A>G	p.S534G	9.415e-06	2.031e-05	tolerated(0.21)	benign(0.212)	Benign	6	0.00512383
MSR1	c.217+5C>T	-	3.766e-05	2.033e-05			Unknown	6	0.00512383
RAD52	c.164G>A	p.R55H	0.0002354	0.0002535	deleterious(0)	probably_damaging(0.994)	Harmful	6	0.00512383
FANCI	c.3236C>T	p.T1079M	0.0003201	0.0003006	deleterious(0.02)	benign(0.248)	VUS	6	0.00512383
WT1	c.681C>T	p.S227=	0.0002636	0.0002198			Unknown	6	0.00512383
RAD50	c.214G>A	p.V72I	3.766e-05	4.877e-05	tolerated(0.8)	benign(0.065)	Benign	6	0.00512383
SDHA	c.1661G>A	p.R554Q	0.0003201	0.0002725	tolerated_low_confidence(0.06)	benign(0.11)	Benign	6	0.00512383
FH	c.1077T>A	p.P359=	0.0001036	0.0001016			Unknown	6	0.00512383
SLX4	c.2628C>T	p.D876=	0.0003484	0.0003737			Unknown	6	0.00512383
NBN	c.1035C>T	p.G345=	0.0005273	0.0003941			Unknown	6	0.00512383
TSC2	c.1398G>A	p.L466=	-	5.372e-05			Unknown	6	0.00512383
ATM	c.2466+7A>G	-	0.0003578	0.0003431			Unknown	6	0.00512383
PTCH2	c.2142G>A	p.T714=	0.000226	0.0002246			Unknown	6	0.00512383
POLG	c.156_158del	p.Q55del	0.02836	-			Unknown	6	0.00512383
PALB2	c.1955G>A	p.S652N	8.474e-05	8.529e-05	tolerated(1)	benign(0)	Benign	6	0.00512383
EME2	c.955C>T	p.R319C	0.000198	0.0001959	tolerated(0.12)	benign(0.221)	Benign	6	0.00512383
MSH3	c.162_170del	p.A60_A62del	0.008699	0.00188			Unknown	6	0.00512383
POLQ	c.2300A>G	p.N767S	0.0001506	0.0001219	tolerated(0.12)	benign(0.005)	Benign	6	0.00512383
FANCA	c.2292G>A	p.R764=	0.0001704	0.0001832			Unknown	6	0.00512383
DIS3L2	c.871G>C	p.A291P	4.731e-05	5.691e-05	tolerated(0.16)	benign(0.003)	Benign	6	0.00512383
DICER1	c.1510-4dup	-	0.001959	0.002035			Unknown	6	0.00512383
TERT	c.838G>A	p.E280K	0.0001893	0.0002854	tolerated(0.86)	benign(0.015)	Benign	6	0.00512383
POLD1	c.624G>A	p.P208=	0.0003774	0.0003453			Unknown	6	0.00512383
EPCAM	c.298G>A	p.D100N	0.0001036	0.0001015	deleterious(0)	benign(0.101)	VUS	6	0.00512383
FANCA	c.2981+4dup	-	0.000273	0.0002682			Unknown	6	0.00512383
RB1	c.2455C>G	p.L819V	5.65e-05	9.75e-05	tolerated(0.25)	benign(0.011)	Benign	6	0.00512383
ENG	c.1135-7G>A	-	0.000273	0.0002614			Unknown	6	0.00512383
PTCH1	c.3633C>T	p.P1211=	4.756e-05	4.251e-05			Unknown	6	0.00512383
BRCA1	c.4946T>C	p.M1649T	0.001563	0.001479	tolerated(0.12)	benign(0.026)	Benign	6	0.00512383
POLG	c.153_158del	p.Q54_Q55del	0.003333	-			Unknown	6	0.00512383
ERCC3	c.1743C>T	p.Y581=	0.000273	0.0002316			Unknown	6	0.00512383
PTCH2	c.1172_1173del	p.S391*	0.000273	0.0002518			Unknown	6	0.00512383
TSC2	c.630G>A	p.A210=	0.0002636	0.0002707			Unknown	6	0.00512383
SLX4	c.5072A>G	p.N1691S	0.0001506	0.0001218	tolerated(0.16)	benign(0)	Benign	6	0.00512383
BRIP1	c.2830C>G	p.Q944E	0.0003107	0.0002682	tolerated_low_confidence(0.27)	benign(0.358)	Benign	6	0.00512383
EPAS1	c.1737G>A	p.P579=	0.005772	0.006536			Unknown	6	0.00512383
SDHA	c.1367C>T	p.S456L	0.0229	6.745e-05	deleterious_low_confidence(0)	probably_damaging(0.993)	Harmful	5	0.00426985
BRCA2	c.7052C>G	p.A2351G	0.0001036	0.0001383	deleterious(0)	benign(0.013)	VUS	5	0.00426985
EGFR	c.222T>C	p.Y74=	0.000226	0.0001503			Unknown	5	0.00426985
FANCA	c.3031C>T	p.R1011C	0.0001506	0.0001178	tolerated(0.24)	benign(0)	Benign	5	0.00426985
RET	c.2508C>T	p.S836=	0.04627	0.04537			Unknown	5	0.00426985
MET	c.2637+6A>G	-	0.0001231	0.0001556			Unknown	5	0.00426985
SDHAF2	c.97C>T	p.R33C	0.0005178	0.0004752	tolerated(0.18)	benign(0.006)	Benign	5	0.00426985
TSHR	c.2272G>A	p.E758K	4.708e-05	2.031e-05	tolerated_low_confidence(0.15)	benign(0.053)	Benign	5	0.00426985
KIT	c.251C>T	p.T84M	0.0002919	0.0003048	tolerated(0.23)	benign(0.068)	Benign	5	0.00426985
POLQ	c.6541A>G	p.K2181E	3.766e-05	4.496e-05	deleterious(0)	probably_damaging(0.996)	Harmful	5	0.00426985
BRCA2	c.3420T>C	p.S1140=	0.0002636	0.000297			Unknown	5	0.00426985
CFTR	c.1312A>G	p.T438A	0.001526	0.000188	tolerated(0.19)	benign(0)	Benign	5	0.00426985
RECQL4	c.171C>T	p.G57=	0.0001452	0.0001546			Unknown	5	0.00426985
TSC2	c.3968C>T	p.A1323V	3.767e-05	5.395e-05	tolerated_low_confidence(0.35)	benign(0.045)	Benign	5	0.00426985
GPC3	c.338-6_338-5del	-	0.03302	0.02553			Unknown	5	0.00426985
PPM1D	c.230A>G	p.D77G	-	-	tolerated(0.32)	benign(0.001)	Benign	5	0.00426985
FANCI	c.2907A>C	p.L969F	0.0002354	0.0002071	tolerated(0.11)	benign(0.22)	Benign	5	0.00426985
TSC2	c.3421G>A	p.A1141T	0.0005367	0.0004722	tolerated(0.23)	benign(0.059)	Benign	5	0.00426985
RPA1	c.1630G>A	p.A544T	0.0002636	0.0001951	tolerated(0.23)	benign(0.088)	Benign	5	0.00426985
CDKN1C	c.600A>G	p.P200=	-	-			Unknown	5	0.00426985
TSC2	c.2967-6C>T	-	0.0001224	0.0001182			Unknown	5	0.00426985
MITF	c.339G>A	p.P113=	2.832e-05	2.038e-05			Unknown	5	0.00426985
ACVRL1	c.77C>T	p.P26L	0.0001697	0.0002031	tolerated(0.06)	benign(0.079)	Benign	5	0.00426985
NTRK1	c.295G>A	p.V99M	0.0001695	0.000183	tolerated(0.17)	possibly_damaging(0.801)	VUS	5	0.00426985
MSH6	c.1063G>A	p.G355S	8.474e-05	0.0001179	tolerated(0.45)	benign(0.003)	Benign	5	0.00426985
PRKDC	c.4308T>C	p.Y1436=	0.0001893	0.0002104			Unknown	5	0.00426985
FANCA	c.3114C>T	p.L1038=	0.0003954	0.0003452			Unknown	5	0.00426985
MSH3	c.169G>C	p.A57P	5.334e-05	3.636e-05	tolerated_low_confidence(0.3)	unknown(0)	Benign	5	0.00426985
CDK6	c.363C>G	p.T121=	0.0001318	8.908e-05			Unknown	5	0.00426985
PRKDC	c.11763C>T	p.D3921=	0.0002173	0.0002603			Unknown	5	0.00426985
ATM	c.2220A>G	p.A740=	0.0001036	9.348e-05			Unknown	5	0.00426985
SMARCA4	c.3765G>A	p.E1255=	0.0001412	0.0001058			Unknown	5	0.00426985
SLX4	c.5153+6C>A	-	1.883e-05	2.844e-05			Unknown	5	0.00426985
PMS2	c.1560G>A	p.A520=	0.000226	0.0003536			Unknown	5	0.00426985
SDHA	c.739A>G	p.I247V	0.0001224	0.0001301	deleterious_low_confidence(0.02)	benign(0.02)	VUS	5	0.00426985
BRCA1	c.3739G>A	p.V1247I	6.591e-05	8.536e-05	tolerated(0.54)	benign(0.012)	Benign	5	0.00426985
RAD54B	c.278T>C	p.L93P	1.883e-05	1.661e-05	tolerated_low_confidence(0.29)	benign(0.043)	Benign	5	0.00426985
RET	c.2939+6C>T	-	0.0001036	8.125e-05			Unknown	5	0.00426985
TRIM33	c.2967+3G>A	-	0.0001224	0.0001063			Unknown	5	0.00426985
ERCC5	c.2421C>T	p.I807=	6.591e-05	5.28e-05			Unknown	5	0.00426985
BRIP1	c.1935+7T>C	-	9.416e-05	8.128e-05			Unknown	5	0.00426985
POLQ	c.6656G>A	p.C2219Y	6.591e-05	6.544e-05	tolerated(0.06)	benign(0)	Benign	5	0.00426985
EXT2	c.704C>T	p.A235V	8.474e-05	8.127e-05	tolerated(0.68)	benign(0.086)	Benign	5	0.00426985
RECQL4	c.3120G>A	p.P1040=	4.726e-05	3.263e-05			Unknown	5	0.00426985
MSH3	c.2731T>G	p.L911V	6.591e-05	5.686e-05	deleterious(0.02)	benign(0.106)	VUS	5	0.00426985
PTCH2	c.2248G>A	p.A750T	0.0002354	0.0002642	tolerated(0.07)	benign(0.001)	Benign	5	0.00426985
TP53	c.91G>A	p.V31I	0.0002731	0.0002248	tolerated(0.24)	benign(0.001)	Benign	5	0.00426985
POLE	c.4541T>C	p.V1514A	0.0002071	0.0001908	tolerated(0.07)	benign(0.081)	Benign	5	0.00426985
FANCG	c.1808C>T	p.S603F	0.0001601	0.0001462	deleterious(0)	benign(0.06)	VUS	5	0.00426985
MET	c.3119G>A	p.R1040Q	0.0001512	0.0001098	tolerated(0.08)	probably_damaging(0.935)	VUS	5	0.00426985
PHOX2B	c.776C>G	p.A259G	-	-	tolerated_low_confidence(0.4)	benign(0)	Benign	5	0.00426985
FANCG	c.1545C>T	p.A515=	0.0003578	0.0003736			Unknown	5	0.00426985
MDH2	c.375C>T	p.T125=	8.474e-05	4.474e-05			Unknown	5	0.00426985
TERT	c.2178G>A	p.T726=	0.0001224	0.0001137			Unknown	5	0.00426985
PRSS1	c.177A>G	p.V59=	0.03656	0.0002613			Unknown	5	0.00426985
KIT	c.1290A>G	p.A430=	0.000113	0.0001259			Unknown	5	0.00426985
ERCC5	c.2995T>G	p.L999V	0.0002919	0.0001991	tolerated(0.22)	benign(0.011)	Benign	5	0.00426985
EMSY	c.2216T>C	p.V739A	0.0003955	0.0003303	tolerated(0.11)	possibly_damaging(0.675)	VUS	5	0.00426985
FANCD2	c.4234_4239del	p.S1412_E1413del	0.0001318	0.0001015			Unknown	5	0.00426985
PHOX2B	c.768A>G	p.A256=	3.254e-05	0.0005915			Unknown	5	0.00426985
EME1	c.950G>A	p.R317Q	0.0003295	0.0002762	tolerated(0.37)	benign(0.001)	Benign	5	0.00426985
NBN	c.505C>T	p.R169C	8.474e-05	6.502e-05	tolerated(0.13)	benign(0.021)	Benign	5	0.00426985
ENG	c.69T>C	p.S23=	4.708e-05	8.533e-05			Unknown	5	0.00426985
RAD50	c.3790C>T	p.L1264F	0.0003107	0.0002682	deleterious(0)	probably_damaging(0.999)	Harmful	5	0.00426985
FANCI	c.3907G>A	p.E1303K	8.474e-05	7.718e-05	tolerated(0.21)	benign(0.075)	Benign	5	0.00426985
PRKDC	c.8412A>C	p.A2804=	0.0002841	0.0002079			Unknown	5	0.00426985
MSH2	c.2516A>G	p.H839R	1.883e-05	2.437e-05	tolerated(0.29)	benign(0.425)	Benign	5	0.00426985
MSH3	c.129A>G	p.A43=	0.004516	0.005072			Unknown	5	0.00426985
SMARCE1	c.157-4G>A	-	0.0001224	0.0001179			Unknown	5	0.00426985
KIT	c.910A>G	p.T304A	0.0002166	0.0001869	tolerated(0.51)	probably_damaging(0.973)	VUS	5	0.00426985
PPM1D	c.1343A>G	p.N448S	0.0001883	0.000134	tolerated(0.36)	benign(0.03)	Benign	5	0.00426985
POLQ	c.409C>T	p.R137W	4.708e-05	5.711e-05	deleterious(0)	possibly_damaging(0.892)	Harmful	5	0.00426985
AR	c.173A>T	p.Q58L	2.31e-05	0.0001502	deleterious_low_confidence(0.01)	benign(0.281)	VUS	5	0.00426985
ERCC4	c.2734G>A	p.G912R	0.0002826	0.0002059	deleterious(0.01)	possibly_damaging(0.542)	Harmful	5	0.00426985
SLX1A	c.267C>G	p.H89Q	-	0.0001318	tolerated(0.5)	benign(0.026)	Benign	5	0.00426985
SLX4	c.4765C>T	p.R1589C	0.0001601	0.0001462	deleterious(0)	probably_damaging(0.995)	Harmful	5	0.00426985
APC	c.5257G>C	p.A1753P	1.883e-05	2.038e-05	tolerated_low_confidence(0.57)	benign(0.003)	Benign	5	0.00426985
RAD54B	c.88C>G	p.L30V	0.03993	0.03787	tolerated_low_confidence(0.58)	benign(0)	Benign	5	0.00426985
SDHA	c.1371C>A	p.L457=	0.02309	0.0001057			Unknown	5	0.00426985
NBN	c.1036G>A	p.V346M	0.000273	0.0002925	tolerated(0.13)	benign(0)	Benign	5	0.00426985
PRSS1	c.40C>G	p.L14V	9.415e-06	4.061e-06	tolerated(1)	benign(0)	Benign	5	0.00426985
NTHL1	c.470G>C	p.R157P	6.593e-05	6.555e-05	deleterious(0.01)	possibly_damaging(0.587)	Harmful	5	0.00426985
MUS81	c.565C>T	p.L189F	0.000273	0.0002113	deleterious(0)	probably_damaging(0.94)	Harmful	5	0.00426985
SUFU	c.31G>C	p.G11R	-	0.002637	tolerated_low_confidence(0.12)	probably_damaging(0.974)	VUS	5	0.00426985
RECQL4	c.1321C>T	p.P441S	0.0001796	0.0001549	tolerated(0.41)	benign(0.047)	Benign	5	0.00426985
KLLN	c.438del	p.A147Pfs*35	-	0.0002009			Unknown	5	0.00426985
SMARCA4	c.2532T>C	p.F844=	4.708e-05	2.459e-05			Unknown	4	0.00341588
SMARCB1	c.978C>T	p.Y326=	4.708e-05	5.282e-05			Unknown	4	0.00341588
BARD1	c.233G>A	p.C78Y	3.77e-05	3.343e-05	tolerated(0.24)	possibly_damaging(0.809)	VUS	4	0.00341588
BARD1	c.556A>G	p.S186G	4.708e-05	4.899e-05	deleterious(0)	benign(0.062)	VUS	4	0.00341588
BRCA1	c.571G>A	p.V191I	0.0002542	0.00026	tolerated(0.06)	benign(0.049)	Benign	4	0.00341588
POLE	c.4941C>T	p.F1647=	0.000273	0.0002241			Unknown	4	0.00341588
ATR	c.6126T>C	p.L2042=	0.0001506	0.0001422			Unknown	4	0.00341588
BRCA2	c.1362A>G	p.K454=	0.0003013	0.0003535			Unknown	4	0.00341588
TERT	c.2511C>T	p.L837=	0.0001036	7.742e-05			Unknown	4	0.00341588
DICER1	c.4873T>C	p.S1625P	9.415e-06	-	tolerated(0.21)	benign(0)	Benign	4	0.00341588
FH	c.260G>A	p.R87H	2.825e-05	3.249e-05	deleterious(0)	probably_damaging(0.936)	Harmful	4	0.00341588
BRIP1	c.2324A>G	p.N775S	0.0001224	0.0001178	deleterious(0.01)	probably_damaging(0.951)	Harmful	4	0.00341588
FANCC	c.1000C>T	p.R334W	8.478e-05	0.0001031	deleterious(0)	possibly_damaging(0.536)	Harmful	4	0.00341588
PTCH2	c.1016A>G	p.H339R	0.000113	6.092e-05	deleterious(0.01)	benign(0.25)	VUS	4	0.00341588
NF1	c.2622G>A	p.K874=	7.532e-05	6.104e-05			Unknown	4	0.00341588
REV3L	c.2853T>C	p.I951=	7.533e-05	5.884e-05			Unknown	4	0.00341588
RAD50	c.323A>G	p.K108R	4.708e-05	5.283e-05	tolerated(0.12)	possibly_damaging(0.902)	VUS	4	0.00341588
MLH3	c.3406G>A	p.E1136K	-	1.624e-05	deleterious(0.02)	benign(0.022)	VUS	4	0.00341588
MSH3	c.204T>G	p.A68=	0.002921	0.0007645			Unknown	4	0.00341588
RB1	c.13A>C	p.T5P	-	-	tolerated_low_confidence(0.28)	benign(0.044)	Benign	4	0.00341588
PHOX2B	c.761C>G	p.A254G	-	-	tolerated_low_confidence(0.42)	benign(0)	Benign	4	0.00341588
RHBDF2	c.325C>T	p.R109C	0.0001224	0.0002503	deleterious(0.01)	possibly_damaging(0.676)	Harmful	4	0.00341588
DMC1	c.60G>A	p.L20=	0.0001224	0.0001626			Unknown	4	0.00341588
FANCM	c.3525G>T	p.Q1175H	0.0001224	0.0001017	tolerated(0.27)	benign(0.001)	Benign	4	0.00341588
PRKDC	c.3730C>T	p.R1244W	0	0	deleterious(0.01)	possibly_damaging(0.663)	Harmful	4	0.00341588
VHL	c.119C>T	p.P40L	0.0001417	0.0002791	deleterious(0.01)	benign(0.027)	VUS	4	0.00341588
AXIN2	c.1181G>A	p.R394H	0.0006967	0.0008465	deleterious(0)	possibly_damaging(0.903)	Harmful	4	0.00341588
TSHR	c.1143T>C	p.F381=	3.766e-05	2.437e-05			Unknown	4	0.00341588
POLG	c.1965G>A	p.L655=	2.825e-05	5.329e-05			Unknown	4	0.00341588
FANCM	c.5026G>A	p.E1676K	0.0001883	0.0001953	deleterious(0)	probably_damaging(0.994)	Harmful	4	0.00341588
KLLN	c.382C>G	p.R128G	0.01067	0.006384	deleterious(0.03)	probably_damaging(0.918)	Harmful	4	0.00341588
XRCC2	c.354G>A	p.V118=	0.0003013	0.0003668			Unknown	4	0.00341588
SLX4	c.5436C>T	p.A1812=	2.825e-05	2.042e-05			Unknown	4	0.00341588
RNASEL	c.1784C>T	p.T595M	0.000113	0.0001341	tolerated(0.1)	probably_damaging(0.971)	VUS	4	0.00341588
BRCA2	c.9285C>T	p.D3095=	8.474e-05	7.333e-05			Unknown	4	0.00341588
RNASEL	c.306G>C	p.A102=	0.000273	0.0002161			Unknown	4	0.00341588
RECQL4	c.39G>A	p.A13=	8.627e-05	2.558e-05			Unknown	4	0.00341588
RAD51	c.768C>T	p.L256=	7.532e-05	7.715e-05			Unknown	4	0.00341588
RAD50	c.3902A>G	p.K1301R	2.825e-05	4.064e-05	tolerated(0.12)	benign(0.003)	Benign	4	0.00341588
EZH2	c.933T>C	p.Y311=	9.415e-05	9.343e-05			Unknown	4	0.00341588
XPA	c.289G>A	p.V97I	0.0006687	0.0005634	tolerated(0.32)	benign(0.069)	Benign	4	0.00341588
SLX1A	c.219G>A	p.P73=	0.0001132	6.343e-05			Unknown	4	0.00341588
PTCH2	c.738C>T	p.A246=	4.708e-05	4.52e-05			Unknown	4	0.00341588
KLLN	c.392A>G	p.N131S	0.0113	0.006881	tolerated(1)	benign(0)	Benign	4	0.00341588
HMMR	c.146-5C>T	-	0.0001412	8.977e-05			Unknown	4	0.00341588
PRSS1	c.346C>T	p.R116C	0.000113	7.31e-05	deleterious(0)	possibly_damaging(0.48)	Harmful	4	0.00341588
BRCA1	c.4347A>G	p.T1449=	7.532e-05	8.535e-05			Unknown	4	0.00341588
HMMR	c.911A>G	p.H304R	8.476e-05	8.319e-05	tolerated(0.35)	benign(0.036)	Benign	4	0.00341588
MC1R	c.795C>T	p.V265=	8.495e-05	8.936e-05			Unknown	4	0.00341588
CDKN1C	c.600_611dup	p.A213_P216dup	-	-			Unknown	4	0.00341588
KLLN	c.445T>A	p.W149R	0.006065	0.006478	tolerated_low_confidence(0.23)	benign(0.031)	Benign	4	0.00341588
AR	c.1149C>T	p.P383=	0.0001805	0.0001254			Unknown	4	0.00341588
RAD54B	c.1221_1223del	p.I408del	9.418e-05	7.777e-05			Unknown	4	0.00341588
KIF1B	c.3649C>T	p.P1217S	0.0001977	0.000183	tolerated(0.41)	benign(0.05)	Benign	4	0.00341588
TERT	c.1393G>C	p.V465L	7.651e-05	0.000104	tolerated(1)	benign(0.034)	Benign	4	0.00341588
MSH2	c.2197G>A	p.A733T	5.649e-05	4.874e-05	deleterious(0)	probably_damaging(0.954)	Harmful	4	0.00341588
NF2	c.1439C>T	p.T480M	0.000147	9.708e-05	tolerated(0.13)	benign(0.329)	Benign	4	0.00341588
AKT1	c.951C>A	p.A317=	0.0001036	7.725e-05			Unknown	4	0.00341588
RET	c.2523G>A	p.P841=	0.0001318	9.773e-05			Unknown	4	0.00341588
CDH1	c.1018A>G	p.T340A	0.0002825	0.0002477	tolerated(0.06)	benign(0)	Benign	4	0.00341588
ATR	c.4649C>T	p.A1550V	6.591e-05	8.538e-05	tolerated(0.2)	benign(0.057)	Benign	4	0.00341588
ATRX	c.2466A>C	p.E822D	1.883e-05	5.637e-06	deleterious_low_confidence(0.01)	probably_damaging(0.97)	Harmful	4	0.00341588
PTCH1	c.1247C>G	p.T416S	9.415e-05	0.0001868	tolerated(1)	benign(0.006)	Benign	4	0.00341588
RHBDF2	c.1281C>T	p.P427=	5.66e-05	7.477e-05			Unknown	4	0.00341588
RAD54L	c.1862T>C	p.L621P	5.649e-05	4.47e-05	deleterious(0)	probably_damaging(0.999)	Harmful	4	0.00341588
BRCA2	c.2550A>G	p.Q850=	0.0001412	0.0001588			Unknown	4	0.00341588
PDGFRA	c.3098A>T	p.D1033V	9.415e-05	0.0001097	tolerated(0.06)	possibly_damaging(0.522)	VUS	4	0.00341588
PTCH2	ENST00000372192.3:c.1758C>T	p.D586=	.	-	.	.	VUS	4	0.00341588
CHEK2	c.884G>A	p.S295N	8.474e-05	6.095e-05	tolerated(0.28)	benign(0.006)	Benign	4	0.00341588
FANCA	c.2080G>A	p.D694N	0.0001412	0.0001137	deleterious(0.05)	benign(0.055)	Benign	4	0.00341588
PALLD	c.1065A>G	p.T355=	9.415e-05	0.0001147			Unknown	4	0.00341588
SLX4	c.2034T>G	p.V678=	0.0003295	0.0002965			Unknown	4	0.00341588
POLQ	c.961G>A	p.G321R	3.766e-05	5.06e-05	deleterious(0)	benign(0.146)	VUS	4	0.00341588
PTCH2	c.2059-4G>A	-	0.000113	0.0001209			Unknown	4	0.00341588
NTRK1	c.631G>A	p.V211M	4.174e-05	0.000227	deleterious(0.02)	probably_damaging(0.999)	Harmful	4	0.00341588
FANCG	c.1768C>G	p.P590A	0.0001036	7.716e-05	deleterious(0)	probably_damaging(0.992)	Harmful	4	0.00341588
XRCC2	c.596T>C	p.M199T	7.532e-05	7.311e-05	deleterious(0.03)	benign(0.215)	VUS	4	0.00341588
MET	c.632T>G	p.L211W	0.0003502	0.0002569	deleterious(0.04)	probably_damaging(0.961)	Harmful	4	0.00341588
POLG	c.3428A>G	p.E1143G	0.02678	0.02875	tolerated(0.16)	benign(0.334)	Benign	4	0.00341588
MC1R	c.852C>T	p.L284=	1.888e-05	1.219e-05			Unknown	4	0.00341588
BRCA1	c.3448C>T	p.P1150S	8.474e-05	6.91e-05	deleterious(0)	possibly_damaging(0.873)	Harmful	4	0.00341588
PRKDC	c.3583G>A	p.V1195I	0.0001704	0.0001912	tolerated(0.15)	probably_damaging(0.998)	VUS	4	0.00341588
BRCA1	c.66dup	p.E23Rfs*18	-	-			Unknown	4	0.00341588
ATM	c.283C>A	p.Q95K	0.0001695	0.000122	tolerated(0.17)	possibly_damaging(0.828)	VUS	4	0.00341588
RAD51C	c.233C>T	p.T78I	5.649e-05	6.092e-05	tolerated(0.17)	benign(0.056)	Benign	4	0.00341588
FANCD2	c.3343G>A	p.V1115I	2.825e-05	3.655e-05	tolerated(0.07)	benign(0.051)	Benign	4	0.00341588
RECQL4	c.633T>C	p.D211=	0.000417	0.0003594			Unknown	4	0.00341588
BRCA1	c.2726A>T	p.N909I	5.649e-05	8.145e-05	deleterious(0.01)	benign(0.205)	VUS	4	0.00341588
FANCG	c.1702A>G	p.T568A	6.591e-05	6.096e-05	tolerated(1)	benign(0)	Benign	4	0.00341588
FANCL	c.637G>A	p.D213N	0.0001318	0.0001097	deleterious(0)	probably_damaging(1)	Harmful	4	0.00341588
MC1R	c.414C>T	p.I138=	0.0001036	0.0001166			Unknown	4	0.00341588
NTRK1	c.612G>A	p.S204=	0.0005217	0.00058			Unknown	4	0.00341588
PHOX2B	c.741_758del	p.A255_A260del	0.0006457	0.001795			Unknown	4	0.00341588
BLM	c.4022C>T	p.A1341V	0.0001412	8.529e-05	tolerated(0.5)	benign(0.057)	Benign	4	0.00341588
AKT1	c.1113G>C	p.T371=	9.415e-06	1.219e-05			Unknown	4	0.00341588
DICER1	c.1449C>T	p.G483=	9.416e-06	8.126e-06			Unknown	4	0.00341588
TSHR	c.733G>A	p.G245S	0.0001412	8.934e-05	deleterious(0)	probably_damaging(1)	Harmful	4	0.00341588
ELAC2	c.347C>T	p.S116F	0.0003013	0.0002639	deleterious(0.03)	possibly_damaging(0.571)	Harmful	4	0.00341588
NF1	c.6033A>G	p.L2011=	5.649e-05	5.28e-05			Unknown	4	0.00341588
BAP1	c.924C>T	p.N308=	6.591e-05	4.472e-05			Unknown	4	0.00341588
DIS3L2	c.2295T>C	p.S765=	0.005202	0.001697			Unknown	4	0.00341588
MET	c.1320A>G	p.T440=	6.624e-05	7.72e-05			Unknown	4	0.00341588
VHL	c.213C>T	p.P71=	0.0002748	0.0002361			Unknown	4	0.00341588
PRKDC	c.8692C>T	p.R2898C	0.03829	0.03824	tolerated(0.05)	possibly_damaging(0.663)	VUS	4	0.00341588
CDH1	c.1500C>T	p.G500=	4.708e-05	2.843e-05			Unknown	4	0.00341588
HMMR	c.314G>A	p.R105Q	0.000113	0.000126	tolerated(0.09)	benign(0.003)	Benign	4	0.00341588
BRCA2	c.1568A>G	p.H523R	0.0001412	0.0001246	tolerated(0.09)	benign(0.066)	Benign	4	0.00341588
PTCH1	c.4210A>G	p.T1404A	0.0001036	8.532e-05	tolerated_low_confidence(0.49)	benign(0)	Benign	4	0.00341588
FANCI	c.284T>A	p.L95Q	0.0001318	0.0001056	deleterious(0)	possibly_damaging(0.898)	Harmful	4	0.00341588
ERCC5	c.3412G>A	p.V1138M	0.000113	9.753e-05	tolerated(0.11)	benign(0.006)	Benign	4	0.00341588
RNASEL	c.126G>A	p.Q42=	0.0001601	0.0002072			Unknown	4	0.00341588
ATRX	c.1448A>C	p.Q483P	9.416e-05	8.418e-05	deleterious_low_confidence(0.02)	benign(0.188)	VUS	4	0.00341588
RAD54L	c.1486+6C>A	-	9.415e-05	0.0001178			Unknown	4	0.00341588
PPM1D	c.217C>G	p.R73G	1.037e-05	2.695e-05	tolerated(0.4)	benign(0.144)	Benign	4	0.00341588
PMS1	c.1352C>T	p.T451M	0.0001412	0.0001059	tolerated(0.06)	benign(0)	Benign	4	0.00341588
ERCC5	c.760A>G	p.M254V	0.02857	0.02984	deleterious(0)	benign(0.365)	VUS	4	0.00341588
KIF1B	c.1255A>T	p.M419L	-	8.13e-06	tolerated(0.96)	benign(0.003)	Benign	4	0.00341588
TSHR	c.1574T>C	p.F525S	0.0001506	0.00013	tolerated(0.11)	probably_damaging(0.967)	VUS	4	0.00341588
SPINK1	c.110A>G	p.N37S	0.0002072	0.0001634	tolerated(0.8)	benign(0)	Benign	4	0.00341588
KLLN	c.472G>T	p.G158W	-	0.0002114	deleterious(0.02)	probably_damaging(0.914)	Harmful	4	0.00341588
GALNT12	c.1392C>T	p.P464=	0.0001224	0.0001137			Unknown	4	0.00341588
EME2	c.228C>T	p.L76=	0.0005461	0.0006736			Unknown	4	0.00341588
BRCA1	c.5584del	p.S1862Vfs*2	-	-			Unknown	4	0.00341588
WRN	c.3893G>T	p.G1298V	0.0001506	8.942e-05	deleterious(0)	probably_damaging(0.998)	Harmful	4	0.00341588
FANCA	c.4225C>T	p.R1409W	0.0001883	0.0001746	deleterious(0.04)	possibly_damaging(0.642)	Harmful	4	0.00341588
CFTR	c.861C>G	p.N287K	6.591e-05	0.0001067	tolerated(0.2)	benign(0.201)	Benign	4	0.00341588
SLX4	c.5060C>G	p.P1687R	0	0	tolerated(0.23)	possibly_damaging(0.521)	VUS	4	0.00341588
XRCC3	c.992C>T	p.T331M	0.0001416	0.0001173	deleterious(0.01)	benign(0.24)	VUS	4	0.00341588
HMMR	c.1395G>A	p.A465=	0.000339	0.0003421			Unknown	4	0.00341588
CYLD	c.2814G>A	p.L938=	0.0002744	0.0002358			Unknown	4	0.00341588
RNASEL	c.977A>G	p.K326R	0.0004049	0.0003864	tolerated(1)	benign(0)	Benign	4	0.00341588
BRCA1	c.3770_3771del	p.E1257Gfs*9	9.415e-06	8.131e-06			Unknown	4	0.00341588
ERCC5	c.1669G>A	p.D557N	5.649e-05	2.843e-05	tolerated(0.18)	benign(0.003)	Benign	4	0.00341588
CYLD	c.1189C>A	p.R397S	2.839e-05	2.034e-05	tolerated(0.73)	benign(0.005)	Benign	4	0.00341588
RBBP8	c.992G>C	p.G331A	4.709e-05	4.875e-05	deleterious(0.01)	possibly_damaging(0.642)	Harmful	4	0.00341588
ALK	c.1427T>C	p.V476A	0.02875	0.02858	tolerated(0.91)	benign(0)	Benign	4	0.00341588
PRKDC	c.3388G>T	p.A1130S	5.722e-05	6.145e-05	tolerated(0.1)	benign(0.255)	Benign	4	0.00341588
ATR	c.1885+7G>A	-	0.0002354	0.0002562			Unknown	3	0.00256191
RAD51D	c.145-4A>G	-	2.847e-05	1.643e-05			Unknown	3	0.00256191
POLQ	c.6634T>C	p.F2212L	-	-	deleterious(0.03)	possibly_damaging(0.787)	Harmful	3	0.00256191
FANCD2	c.1440T>C	p.H480=	2.825e-05	2.848e-05			Unknown	3	0.00256191
PPP2R2A	c.1029C>T	p.L343=	0.03196	0.03377			Unknown	3	0.00256191
SLX4	c.1706C>T	p.P569L	0.0002925	0.0002607	tolerated(1)	benign(0)	Benign	3	0.00256191
WT1	c.795C>A	p.P265=	-	1.261e-05			Unknown	3	0.00256191
BRCA2	c.8525G>A	p.R2842H	6.591e-05	6.101e-05	deleterious(0)	probably_damaging(0.999)	Harmful	3	0.00256191
BRCA1	c.5420T>C	p.L1807P	-	4.061e-06	deleterious(0)	probably_damaging(0.995)	Harmful	3	0.00256191
EXT1	c.768C>T	p.I256=	7.532e-05	8.527e-05			Unknown	3	0.00256191
TSC2	c.167A>G	p.N56S	8.474e-05	6.094e-05	tolerated(0.11)	probably_damaging(0.987)	VUS	3	0.00256191
CDKN1C	c.618G>C	p.P206=	-	-			Unknown	3	0.00256191
BARD1	c.1586G>A	p.R529Q	0.0001977	0.0001219	tolerated(0.07)	benign(0.229)	Benign	3	0.00256191
ELAC2	c.1692C>T	p.R564=	0.001254	0.001405			Unknown	3	0.00256191
RAD54B	c.1518+6A>G	-	2.826e-05	2.105e-05			Unknown	3	0.00256191
FANCA	c.911G>C	p.G304A	1.883e-05	2.438e-05	tolerated(0.58)	benign(0.012)	Benign	3	0.00256191
MXI1	c.594G>A	p.E198=	0.000113	7.797e-05			Unknown	3	0.00256191
PMS2	c.52A>G	p.I18V	0.009097	0.009061	deleterious(0)	probably_damaging(0.994)	Harmful	3	0.00256191
BRCA2	c.4599A>C	p.K1533N	8.474e-05	8.953e-05	tolerated(0.17)	benign(0.017)	Benign	3	0.00256191
ATM	c.8391T>C	p.S2797=	0.0001601	0.0001342			Unknown	3	0.00256191
MSH3	c.181G>C	p.A61P	0.0006204	0.0008407	tolerated_low_confidence(0.33)	benign(0.162)	Benign	3	0.00256191
MSH3	c.3335C>T	p.T1112M	7.533e-05	9.356e-05	tolerated(0.24)	benign(0.015)	Benign	3	0.00256191
ERCC5	c.2912C>T	p.T971M	5.649e-05	5.28e-05	tolerated(0.05)	benign(0.11)	Benign	3	0.00256191
RECQL4	c.1959A>G	p.A653=	0.0002386	0.0002158			Unknown	3	0.00256191
TP53BP1	c.3443T>C	p.L1148S	0	9.748e-05	tolerated(0.12)	benign(0.23)	Benign	3	0.00256191
EPAS1	c.26+7G>C	-	9.43e-05	7.956e-05			Unknown	3	0.00256191
BRCA2	c.5722_5723del	p.L1908Rfs*2	-	4.069e-06			Unknown	3	0.00256191
CFTR	c.2770G>A	p.D924N	3.766e-05	6.499e-05	deleterious(0.02)	probably_damaging(0.916)	Harmful	3	0.00256191
MLH1	c.776T>C	p.L259S	2.825e-05	2.035e-05	deleterious(0.03)	possibly_damaging(0.706)	Harmful	3	0.00256191
DICER1	c.4416T>C	p.F1472=	1.883e-05	3.25e-05			Unknown	3	0.00256191
SMARCA4	c.3579C>T	p.I1193=	2.825e-05	3.664e-05			Unknown	3	0.00256191
MSH2	c.1690A>G	p.T564A	0.0001884	0.00022	tolerated(0.81)	benign(0.001)	Benign	3	0.00256191
PRKDC	c.8170C>G	p.L2724V	1.892e-05	2.038e-05	tolerated(0.14)	benign(0.021)	Benign	3	0.00256191
SLX4	c.5336G>A	p.R1779Q	0.0001224	6.098e-05	deleterious(0)	benign(0.007)	VUS	3	0.00256191
FANCI	c.467G>A	p.C156Y	0.0001789	0.000199	tolerated(0.91)	benign(0)	Benign	3	0.00256191
MSH2	c.14C>A	p.P5Q	2.836e-05	3.263e-05	deleterious(0)	benign(0.416)	VUS	3	0.00256191
TP53	c.920-5C>T	-	5.649e-05	5.279e-05			Unknown	3	0.00256191
FANCA	c.3935-6T>C	-	0.0001099	0.0002298			Unknown	3	0.00256191
DICER1	c.1692G>A	p.A564=	0.0001224	0.0001057			Unknown	3	0.00256191
SPRED1	c.879G>A	p.L293=	0.000113	0.0001463			Unknown	3	0.00256191
BRCA2	c.631+1G>A	p.X211_splice	-	-			Unknown	3	0.00256191
ELAC2	c.170C>T	p.T57I	9.459e-06	8.78e-06	tolerated(0.13)	probably_damaging(0.983)	VUS	3	0.00256191
PTCH2	c.788G>A	p.S263N	4.71e-05	3.122e-05	deleterious(0.01)	benign(0.283)	VUS	3	0.00256191
MITF	c.623A>G	p.E208G	0.0001507	0.0001911	tolerated(0.24)	benign(0.37)	Benign	3	0.00256191
FANCG	c.458C>G	p.A153G	4.708e-05	4.468e-05	deleterious(0.03)	benign(0.018)	VUS	3	0.00256191
HNF1B	c.313G>A	p.E105K	9.417e-05	0.0001295	tolerated(0.29)	probably_damaging(0.996)	VUS	3	0.00256191
PRKDC	c.9919+3A>G	-	0.0003121	0.0002988			Unknown	3	0.00256191
BUB1B	c.1875A>G	p.I625M	0.0001789	0.0001259	tolerated(0.1)	possibly_damaging(0.674)	VUS	3	0.00256191
POT1	c.1077A>G	p.Q359=	0.0002166	0.0002095			Unknown	3	0.00256191
HNF1A	c.864delinsCC	p.G292Rfs*25	-	-			Unknown	3	0.00256191
PMS1	c.315+6G>A	-	0.03116	0.03444			Unknown	3	0.00256191
AR	c.271_273dup	p.Q91dup	0.0002486	5.823e-05			Unknown	3	0.00256191
BRCA1	c.135-2A>G	p.X45_splice	-	-			Unknown	3	0.00256191
MSH3	c.358+5G>A	-	0.0001036	0.0001097			Unknown	3	0.00256191
STK11	c.96C>G	p.T32=	0.0003968	0.0003102			Unknown	3	0.00256191
BRCA1	c.3294del	p.P1099Lfs*10	-	-			Unknown	3	0.00256191
APC	c.1005A>G	p.L335=	9.415e-05	0.0001424			Unknown	3	0.00256191
EXT2	c.281G>A	p.R94H	7.532e-05	0.0001179	tolerated(0.26)	benign(0.003)	Benign	3	0.00256191
RAD52	c.742G>A	p.A248T	3.782e-05	6.388e-05	tolerated(0.46)	benign(0)	Benign	3	0.00256191
SUFU	c.1105G>A	p.V369I	7.532e-05	7.309e-05	tolerated(0.32)	benign(0.346)	Benign	3	0.00256191
DICER1	c.3334A>G	p.N1112D	0.0001224	8.54e-05	tolerated(0.39)	benign(0)	Benign	3	0.00256191
MRE11A	c.37T>C	p.F13L	3.768e-05	1.237e-05	tolerated(0.29)	benign(0.139)	Benign	3	0.00256191
MSR1	c.430T>A	p.F144I	7.532e-05	6.096e-05	tolerated(0.18)	benign(0.311)	Benign	3	0.00256191
EME2	c.837C>T	p.G279=	0.0001203	0.0002186			Unknown	3	0.00256191
REV3L	c.682G>A	p.V228I	0.0001224	0.0001301	tolerated(0.13)	benign(0.003)	Benign	3	0.00256191
FAM175A	c.7G>C	p.G3R	0.0001422	0.0002098	deleterious(0.01)	possibly_damaging(0.846)	Harmful	3	0.00256191
BRCA2	c.1275A>G	p.E425=	0.001384	0.001053			Unknown	3	0.00256191
NTRK1	c.1805+8C>A	-	9.428e-06	1.715e-05			Unknown	3	0.00256191
XRCC2	c.115G>A	p.V39M	3.766e-05	0.0001025	tolerated(0.11)	possibly_damaging(0.592)	VUS	3	0.00256191
BRCA1	c.3472G>T	p.E1158*	-	-			Unknown	3	0.00256191
PHB	c.342T>C	p.Y114=	6.591e-05	4.061e-05			Unknown	3	0.00256191
CEP57	c.1171G>A	p.V391I	3.766e-05	4.063e-05	tolerated(0.21)	benign(0)	Benign	3	0.00256191
XPC	c.262A>G	p.I88V	1.893e-05	2.031e-05	tolerated_low_confidence(1)	benign(0)	Benign	3	0.00256191
FANCA	c.1772G>A	p.R591Q	0.0001883	0.0001421	deleterious(0)	benign(0.13)	VUS	3	0.00256191
REV3L	c.3576C>A	p.N1192K	9.415e-06	1.639e-05	tolerated_low_confidence(1)	benign(0.003)	Benign	3	0.00256191
DIS3L2	c.1774G>T	p.A592S	8.517e-05	9.431e-05	tolerated(0.1)	benign(0.193)	Benign	3	0.00256191
MSH6	c.335A>G	p.N112S	9.415e-06	1.624e-05	tolerated(0.65)	benign(0.16)	Benign	3	0.00256191
CDKN1C	c.567_572del	p.A193_P194del	-	-			Unknown	3	0.00256191
SLX4	c.3663G>A	p.A1221=	5.649e-05	6.917e-05			Unknown	3	0.00256191
BRCA1	c.4065_4068del	p.N1355Kfs*10	9.415e-06	8.141e-06			Unknown	3	0.00256191
WRN	c.2128A>G	p.I710V	8.474e-05	0.0001097	tolerated(0.35)	benign(0.039)	Benign	3	0.00256191
SLX4	c.999C>T	p.I333=	0.003041	0.002494			Unknown	3	0.00256191
POLG	c.30C>T	p.A10=	-	3.972e-05			Unknown	3	0.00256191
ATM	c.3194G>A	p.G1065E	1.883e-05	8.126e-06	tolerated(0.35)	benign(0.001)	Benign	3	0.00256191
BRCA1	c.2481A>C	p.E827D	9.415e-06	4.07e-06	deleterious(0.04)	benign(0.16)	VUS	3	0.00256191
DDB2	c.689T>C	p.M230T	8.474e-05	5.685e-05	tolerated(0.58)	benign(0.003)	Benign	3	0.00256191
ENG	c.1098C>T	p.D366=	5.649e-05	7.715e-05			Unknown	3	0.00256191
RECQL4	c.1345A>C	p.T449P	0.0001134	0.000159	tolerated(1)	benign(0)	Benign	3	0.00256191
TSC2	c.1609C>T	p.R537C	0.0002354	0.0001428	deleterious(0.02)	possibly_damaging(0.446)	VUS	3	0.00256191
RAD50	c.2983_2986del	p.E995Rfs*2	9.417e-06	4.476e-05			Unknown	3	0.00256191
FANCF	c.349C>A	p.P117T	0.0001601	0.0002279	deleterious(0.01)	possibly_damaging(0.842)	Harmful	3	0.00256191
RPA1	c.1300G>A	p.G434R	0.000273	0.0002315	tolerated(0.11)	possibly_damaging(0.832)	VUS	3	0.00256191
POLG	c.1066C>T	p.L356=	0.0001412	0.0001991			Unknown	3	0.00256191
POLH	c.2028C>T	p.A676=	0.0005649	0.0004467			Unknown	3	0.00256191
MUS81	c.836G>A	p.R279Q	0.0001318	0.000126	tolerated(0.35)	benign(0.061)	Benign	3	0.00256191
PRKDC	c.9334-6_9334-4del	-	0.002522	0.003792			Unknown	3	0.00256191
CFTR	c.3710G>A	p.G1237D	4.708e-05	3.714e-05	deleterious(0.02)	probably_damaging(0.992)	Harmful	3	0.00256191
ATM	c.6503C>T	p.S2168L	5.649e-05	7.717e-05	deleterious(0)	possibly_damaging(0.883)	Harmful	3	0.00256191
ENG	c.1712G>A	p.R571H	0.0001883	0.0001584	tolerated(0.27)	benign(0.028)	Benign	3	0.00256191
WRN	c.1382C>T	p.T461M	0.0004616	0.0003781	tolerated(0.25)	benign(0.053)	Benign	3	0.00256191
PRKDC	c.1337T>A	p.F446Y	4.731e-05	3.656e-05	tolerated(0.11)	probably_damaging(0.996)	VUS	3	0.00256191
RECQL4	c.2952C>T	p.S984=	1.89e-05	5.725e-05			Unknown	3	0.00256191
NF1	c.4445T>C	p.I1482T	1.883e-05	2.439e-05	deleterious(0)	benign(0.288)	VUS	3	0.00256191
NTHL1	c.53C>G	p.T18S	0.0001326	0.0001365	tolerated_low_confidence(0.11)	possibly_damaging(0.579)	VUS	3	0.00256191
POLQ	c.7318G>A	p.V2440I	0.0001507	0.0001219	deleterious(0)	probably_damaging(0.994)	Harmful	3	0.00256191
EPAS1	c.2473C>T	p.R825W	4.708e-05	7.722e-05	deleterious(0.01)	probably_damaging(0.964)	Harmful	3	0.00256191
ELAC2	c.95C>G	p.P32R	0.0006065	0.00109	tolerated_low_confidence(0.05)	benign(0.02)	Benign	3	0.00256191
SUFU	c.48G>C	p.P16=	-	0.0008332			Unknown	3	0.00256191
ATR	c.3682A>G	p.K1228E	5.649e-05	2.44e-05	tolerated(0.21)	benign(0.049)	Benign	3	0.00256191
PHOX2B	c.740C>G	p.A247G	-	-	tolerated_low_confidence(0.55)	benign(0)	Benign	3	0.00256191
SDHA	c.991G>A	p.A331T	0.0001318	0.0001705	deleterious_low_confidence(0)	probably_damaging(0.985)	Harmful	3	0.00256191
TSC2	c.5312C>T	p.P1771L	0.0002354	0.0001792	tolerated_low_confidence(0.06)	benign(0.117)	Benign	3	0.00256191
MC1R	c.667C>T	p.R223W	0.000104	9.53e-05	deleterious(0)	benign(0.031)	VUS	3	0.00256191
PRKDC	c.7366C>G	p.P2456A	9.49e-06	9.623e-06	tolerated(1)	benign(0.007)	Benign	3	0.00256191
ERCC4	c.2046A>G	p.Q682=	0.0001036	0.0001178			Unknown	3	0.00256191
RAD54L	c.113G>C	p.S38T	9.415e-06	2.03e-05	tolerated(0.48)	benign(0)	Benign	3	0.00256191
FANCM	c.1996A>G	p.R666G	0.0001506	0.0001506	tolerated(0.54)	benign(0)	Benign	3	0.00256191
ATM	c.8987+3G>A	-	6.591e-05	0.0001178			Unknown	3	0.00256191
NBN	c.1083A>G	p.T361=	2.825e-05	3.656e-05			Unknown	3	0.00256191
MSH3	c.172G>C	p.A58P	1.356e-05	2.382e-05	tolerated_low_confidence(0.34)	benign(0.006)	Benign	3	0.00256191
SLX4	c.1977G>A	p.S659=	1.883e-05	5.287e-05			Unknown	3	0.00256191
EMSY	c.156A>G	p.L52=	0.0001601	0.0001162			Unknown	3	0.00256191
FANCD2	c.3466+6G>A	-	-	1.23e-05			Unknown	3	0.00256191
FANCD2	c.2067C>T	p.Y689=	0.0008756	5.287e-05			Unknown	3	0.00256191
BRCA2	c.7522G>A	p.G2508S	0.0001224	0.0001544	deleterious(0)	probably_damaging(1)	Harmful	3	0.00256191
FANCI	c.3832C>T	p.H1278Y	2.825e-05	3.655e-05	tolerated(0.78)	benign(0.001)	Benign	3	0.00256191
MSH6	c.107C>T	p.A36V	0.0001721	0.0001464	tolerated_low_confidence(0.09)	benign(0.041)	Benign	3	0.00256191
CHEK2	c.15G>A	p.S5=	0.0001318	0.0001291			Unknown	3	0.00256191
ATRX	c.189+7A>G	-	0.0001883	0.0001518			Unknown	3	0.00256191
APC	c.573T>C	p.Y191=	0.0003484	0.0003297			Unknown	3	0.00256191
EXT1	c.66T>C	p.Y22=	3.767e-05	4.962e-05			Unknown	3	0.00256191
SMARCA4	c.3483C>T	p.L1161=	4.71e-05	6.014e-05			Unknown	3	0.00256191
POT1	c.1283A>G	p.N428S	0.000113	9.761e-05	tolerated(0.24)	benign(0.033)	Benign	3	0.00256191
NCOA4	c.207C>T	p.H69=	4.708e-05	5.686e-05			Unknown	3	0.00256191
EPCAM	c.903+5A>G	-	1.883e-05	1.218e-05			Unknown	3	0.00256191
FANCA	c.3576G>A	p.P1192=	0.0002919	0.0003054			Unknown	3	0.00256191
EGFR	c.1582A>G	p.N528D	-	4.061e-06	tolerated(0.22)	benign(0.068)	Benign	3	0.00256191
PRKDC	c.10114G>A	p.V3372M	9.459e-06	5.092e-06	deleterious(0)	probably_damaging(1)	Harmful	3	0.00256191
BRCA2	c.1644G>A	p.Q548=	0.0002354	0.0002318			Unknown	3	0.00256191
FANCM	c.2330A>G	p.Y777C	0.0001789	0.0002123	deleterious(0)	possibly_damaging(0.523)	Harmful	3	0.00256191
ATRX	c.1257G>A	p.A419=	9.416e-05	0.0001181			Unknown	3	0.00256191
PRKDC	c.5547G>T	p.V1849=	1.891e-05	1.664e-05			Unknown	3	0.00256191
GEN1	c.974G>T	p.G325V	3.771e-05	2.456e-05	deleterious(0)	benign(0.075)	VUS	3	0.00256191
RECQL4	c.3184C>T	p.R1062W	0.0003123	0.000279	deleterious(0)	probably_damaging(0.988)	Harmful	3	0.00256191
MLH3	c.4032C>T	p.G1344=	0.0001506	0.000134			Unknown	3	0.00256191
CDKN1C	c.624_629del	p.A215_P216del	-	-			Unknown	3	0.00256191
MSH2	c.2447A>G	p.Q816R	1.883e-05	1.625e-05	tolerated(1)	benign(0.013)	Benign	3	0.00256191
BMPR1A	c.37G>A	p.A13T	-	-	tolerated_low_confidence(0.51)	benign(0.01)	Benign	3	0.00256191
BRIP1	c.1018C>T	p.L340F	9.415e-06	1.219e-05	tolerated(0.08)	benign(0.422)	Benign	3	0.00256191
RAD54B	c.586G>A	p.V196I	9.416e-05	6.917e-05	tolerated(0.7)	benign(0)	Benign	3	0.00256191
PHOX2B	c.870C>A	p.P290=	0.02437	0.02312			Unknown	3	0.00256191
APC	c.2280A>G	p.L760=	-	1.223e-05			Unknown	3	0.00256191
RBBP8	c.2437T>A	p.C813S	-	-	deleterious(0)	probably_damaging(0.935)	Harmful	3	0.00256191
CDKN2A	c.343G>T	p.V115L	-	2.12e-05	tolerated(0.35)	benign(0.109)	Benign	3	0.00256191
WRN	c.3778G>A	p.A1260T	0.000113	8.531e-05	tolerated(0.59)	benign(0.164)	Benign	3	0.00256191
PALLD	c.160G>A	p.E54K	9.415e-06	2.034e-05	tolerated(0.3)	benign(0)	Benign	3	0.00256191
ATM	c.8071C>T	p.R2691C	0.000113	0.0001301	deleterious(0)	possibly_damaging(0.794)	Harmful	3	0.00256191
BLM	c.2515A>G	p.K839E	0.0001977	0.0001503	deleterious(0)	benign(0.056)	VUS	3	0.00256191
PRKDC	c.11691G>A	p.L3897=	9.46e-06	3.668e-05			Unknown	3	0.00256191
BAP1	c.651C>T	p.A217=	5.948e-05	0.0002358			Unknown	3	0.00256191
TERT	c.2946T>C	p.C982=	0.0001038	7.31e-05			Unknown	3	0.00256191
NTRK1	c.326A>G	p.D109G	0.0001224	0.0001017	tolerated(0.24)	benign(0.051)	Benign	3	0.00256191
PRKDC	c.8622T>C	p.A2874=	0.0001043	0.0001045			Unknown	3	0.00256191
PDGFRA	c.1631T>C	p.V544A	8.474e-05	0.0001097	deleterious(0)	possibly_damaging(0.452)	VUS	3	0.00256191
CDKN2A	c.344T>A	p.V115E	9.456e-06	2.119e-05	deleterious(0)	probably_damaging(0.982)	Harmful	3	0.00256191
MSH6	c.3244C>T	p.P1082S	5.649e-05	4.468e-05	tolerated(0.14)	benign(0.388)	Benign	3	0.00256191
EXT2	c.1343A>G	p.N448S	9.415e-06	3.25e-05	tolerated(0.07)	benign(0.307)	Benign	3	0.00256191
CEP57	c.471C>T	p.A157=	-	1.224e-05			Unknown	3	0.00256191
BLM	c.1926G>A	p.E642=	2.825e-05	2.446e-05			Unknown	3	0.00256191
BRCA1	c.4185+1G>A	p.X1395_splice	-	-			Unknown	3	0.00256191
HMMR	c.452T>C	p.L151P	-	8.517e-06	deleterious(0)	probably_damaging(0.986)	Harmful	3	0.00256191
FH	c.1421C>G	p.T474R	0.000113	0.0001229	tolerated(0.08)	benign(0.299)	Benign	3	0.00256191
ATRX	c.3306G>A	p.R1102=	5.65e-05	5.072e-05			Unknown	3	0.00256191
TSC2	c.4349C>G	p.P1450R	2.833e-05	1.685e-05	deleterious(0)	probably_damaging(0.994)	Harmful	3	0.00256191
RB1	c.25A>C	p.T9P	-	-	tolerated_low_confidence(0.28)	benign(0)	Benign	3	0.00256191
TP53	c.408A>G	p.Q136=	1.883e-05	8.133e-06			Unknown	3	0.00256191
TSC1	c.819T>G	p.D273E	9.415e-06	4.061e-06	tolerated(1)	benign(0.241)	Benign	3	0.00256191
EPCAM	c.233T>G	p.L78R	9.415e-06	4.061e-06	tolerated(0.15)	benign(0.124)	Benign	3	0.00256191
PPM1D	c.1550C>T	p.T517I	0.0001318	0.0001748	tolerated_low_confidence(0.07)	benign(0)	Benign	3	0.00256191
MITF	c.38T>C	p.V13A	6.669e-05	0.0001114	deleterious(0.05)	benign(0.156)	Benign	3	0.00256191
SLX4	c.5249C>T	p.A1750V	0.0002448	0.0002285	tolerated(0.21)	benign(0.013)	Benign	3	0.00256191
BRCA2	c.3445A>G	p.M1149V	0.0001977	0.0001505	tolerated(0.26)	benign(0)	Benign	3	0.00256191
SLX4	c.2990C>T	p.P997L	3.766e-05	3.254e-05	tolerated(1)	benign(0.003)	Benign	3	0.00256191
NTRK1	c.1344T>C	p.F448=	0.0001318	0.0001381			Unknown	3	0.00256191
FANCG	c.421C>T	p.R141C	0.0002071	0.0001707	tolerated(0.13)	benign(0)	Benign	3	0.00256191
POLD1	c.1138-3C>T	-	0.0001412	9.349e-05			Unknown	3	0.00256191
EPCAM	c.224G>A	p.G75D	1.883e-05	2.031e-05	tolerated(0.22)	benign(0.096)	Benign	3	0.00256191
BRCA1	c.3627dup	p.E1210Rfs*9	9.415e-06	8.129e-06			Unknown	3	0.00256191
FLCN	c.450T>C	p.F150=	0.0001318	0.0001447			Unknown	3	0.00256191
BUB1B	c.2164T>C	p.W722R	0.000113	8.121e-05	deleterious(0.01)	possibly_damaging(0.453)	Harmful	3	0.00256191
RAD54L	c.2200G>A	p.V734I	3.766e-05	5.703e-05	tolerated(0.05)	benign(0.086)	Benign	3	0.00256191
POLN	c.2230C>A	p.P744T	0.000998	0.0008203	tolerated(0.09)	benign(0.356)	Benign	3	0.00256191
POLH	c.40A>G	p.M14V	0.0002166	0.0001868	deleterious(0)	probably_damaging(0.998)	Harmful	3	0.00256191
PALLD	c.365C>T	p.P122L	0.0008285	0.0008094	tolerated(0.14)	benign(0.036)	Benign	3	0.00256191
RECQL4	c.2148C>T	p.I716=	4.735e-05	5.864e-05			Unknown	3	0.00256191
PDGFRA	c.3228C>T	p.I1076=	0.000386	0.000313			Unknown	3	0.00256191
TRIM24	c.222G>T	p.L74=	1.902e-05	1.92e-05			Unknown	3	0.00256191
KIF1B	c.2827C>T	p.L943=	-	-			Unknown	3	0.00256191
ALK	c.472C>A	p.P158T	3.775e-05	3.293e-05	deleterious_low_confidence(0.01)	benign(0.014)	VUS	3	0.00256191
BRCA1	c.212G>A	p.R71K	-	-	deleterious(0)	probably_damaging(0.971)	Harmful	3	0.00256191
RNASEL	c.282G>A	p.T94=	8.474e-05	8.999e-05			Unknown	3	0.00256191
GEN1	c.2433G>T	p.G811=	5.649e-05	6.921e-05			Unknown	3	0.00256191
ERCC2	c.2083C>T	p.R695C	0.0001224	0.0001341	deleterious(0)	possibly_damaging(0.849)	Harmful	3	0.00256191
MET	c.3253C>A	p.Q1085K	5.669e-05	5.283e-05	tolerated(0.43)	benign(0.173)	Benign	3	0.00256191
REV3L	c.3278A>G	p.N1093S	9.415e-06	1.628e-05	tolerated(0.68)	benign(0)	Benign	3	0.00256191
TSC1	c.1113C>T	p.H371=	2.825e-05	-			Unknown	3	0.00256191
FANCC	c.906C>G	p.L302=	0.0001224	0.0001178			Unknown	3	0.00256191
FANCI	c.13A>G	p.I5V	9.415e-06	2.437e-05	deleterious(0.03)	possibly_damaging(0.79)	Harmful	3	0.00256191
FANCG	c.375C>G	p.V125=	0.0002166	0.0002727			Unknown	3	0.00256191
PRKDC	c.12153A>C	p.A4051=	0.0001894	0.0001829			Unknown	3	0.00256191
POT1	c.623G>A	p.S208N	2.825e-05	2.448e-05	tolerated(0.29)	benign(0)	Benign	3	0.00256191
BRCA1	c.446A>C	p.E149A	3.766e-05	5.281e-05	deleterious(0.01)	probably_damaging(0.918)	Harmful	3	0.00256191
CFTR	c.2684G>A	p.S895N	0.0003578	0.0003373	tolerated(0.52)	benign(0.001)	Benign	3	0.00256191
NF2	c.882G>A	p.K294=	4.708e-05	3.659e-05			Unknown	3	0.00256191
POLQ	c.2147A>G	p.H716R	1.883e-05	2.034e-05	deleterious(0)	probably_damaging(0.972)	Harmful	3	0.00256191
FANCA	ENST00000389301.3:c.1756G>A	p.A586T	.	-	deleterious(0.02)	possibly_damaging(0.499)	Harmful	3	0.00256191
ALK	c.4210C>G	p.L1404V	4.708e-05	3.667e-05	tolerated(1)	benign(0.001)	Benign	3	0.00256191
PRKDC	c.10989C>A	p.N3663K	1.894e-05	1.219e-05	tolerated(0.18)	benign(0.098)	Benign	3	0.00256191
RECQL4	c.2463+3T>C	-	0.0001155	0.000125			Unknown	3	0.00256191
FLCN	c.780-6C>T	-	0.0001036	0.0001091			Unknown	3	0.00256191
ATR	c.180C>T	p.D60=	2.825e-05	2.03e-05			Unknown	3	0.00256191
XPC	c.142C>T	p.L48F	0.01989	0.02165	tolerated_low_confidence(0.71)	benign(0.005)	Benign	3	0.00256191
BRIP1	ENST00000259008.2:c.1315C>T	p.R439*	.	-	.	.	VUS	2	0.00170794
FAM175A	c.1117G>A	p.D373N	0.0413	0.04442	deleterious_low_confidence(0.04)	possibly_damaging(0.801)	Harmful	2	0.00170794
FANCC	c.239T>C	p.I80T	3.766e-05	3.253e-05	deleterious(0)	possibly_damaging(0.654)	Harmful	2	0.00170794
PALLD	c.2267G>C	p.S756T	3.766e-05	5.287e-05	deleterious(0.04)	probably_damaging(0.994)	Harmful	2	0.00170794
EXT2	c.481C>T	p.R161W	0.0004331	0.0003413	deleterious(0)	possibly_damaging(0.828)	Harmful	2	0.00170794
EME2	c.748G>A	p.V250I	0	9.363e-05	tolerated(0.27)	benign(0)	Benign	2	0.00170794
CDKN1B	c.283C>G	p.P95A	5.65e-05	6.502e-05	tolerated(0.58)	benign(0.015)	Benign	2	0.00170794
PRSS1	c.166C>T	p.Q56*	0.032	0.0001859			Unknown	2	0.00170794
TSC2	c.1642A>C	p.R548=	4.708e-05	4.889e-05			Unknown	2	0.00170794
NQO2	c.58G>A	p.G20R	3.766e-05	5.279e-05	deleterious(0.03)	benign(0.155)	VUS	2	0.00170794
NF2	c.1215T>G	p.A405=	5.65e-05	3.835e-05			Unknown	2	0.00170794
FANCI	c.1200T>C	p.D400=	9.415e-05	9.341e-05			Unknown	2	0.00170794
PALLD	c.1958C>A	p.P653Q	5.65e-05	0.0001061	deleterious(0)	probably_damaging(0.909)	Harmful	2	0.00170794
NQO2	c.109G>A	p.V37I	7.532e-05	5.687e-05	deleterious(0.04)	benign(0.307)	VUS	2	0.00170794
ELAC2	c.1484A>G	p.K495R	-	4.061e-06	deleterious(0.01)	probably_damaging(0.998)	Harmful	2	0.00170794
BRCA2	c.78A>G	p.P26=	2.825e-05	8.138e-06			Unknown	2	0.00170794
PRKDC	c.8519A>G	p.N2840S	0.000161	0.000122	tolerated(0.22)	benign(0.001)	Benign	2	0.00170794
BRCA2	c.6987_6993del	p.I2330Vfs*35	-	-			Unknown	2	0.00170794
APC	c.5912C>G	p.S1971C	8.474e-05	8.14e-05	deleterious(0)	probably_damaging(0.999)	Harmful	2	0.00170794
RB1	c.2274G>A	p.S758=	1.883e-05	8.123e-06			Unknown	2	0.00170794
MSH3	c.187C>G	p.P63A	0.0005891	0.001126	tolerated_low_confidence(1)	benign(0.067)	Benign	2	0.00170794
MSH2	c.693C>T	p.D231=	3.766e-05	2.438e-05			Unknown	2	0.00170794
POLE	c.1346C>T	p.T449M	3.766e-05	3.269e-05	tolerated(0.21)	benign(0.007)	Benign	2	0.00170794
RAD51D	c.570G>A	p.V190=	4.708e-05	5.328e-05			Unknown	2	0.00170794
MSH3	c.1969C>T	p.P657S	3.766e-05	2.845e-05	tolerated(0.28)	probably_damaging(1)	VUS	2	0.00170794
SMARCA4	c.459G>A	p.P153=	0.0001036	8.235e-05			Unknown	2	0.00170794
HMMR	c.104C>T	p.P35L	0.0002261	0.0001257	deleterious(0.04)	probably_damaging(0.991)	Harmful	2	0.00170794
EMSY	c.3225G>C	p.Q1075H	-	-	tolerated_low_confidence(0.12)	possibly_damaging(0.556)	VUS	2	0.00170794
NTRK1	c.1484A>G	p.Q495R	9.415e-06	2.036e-05	deleterious(0.02)	probably_damaging(0.979)	Harmful	2	0.00170794
RAD54L	c.770G>T	p.G257V	8.474e-05	7.716e-05	tolerated(0.14)	benign(0.274)	Benign	2	0.00170794
HMMR	c.2059G>T	p.D687Y	8.476e-05	5.047e-05	deleterious(0)	probably_damaging(0.999)	Harmful	2	0.00170794
PRKDC	c.8001C>G	p.V2667=	9.426e-05	0.0001056			Unknown	2	0.00170794
ATR	c.6327C>T	p.R2109=	0.0001601	0.0001098			Unknown	2	0.00170794
SUFU	c.1157+6C>T	-	3.766e-05	3.253e-05			Unknown	2	0.00170794
HNF1A	c.492C>G	p.T164=	0.0001318	0.0001503			Unknown	2	0.00170794
SMARCA4	c.1114T>C	p.Y372H	0.009387	0.009528	tolerated(0.46)	benign(0.039)	Benign	2	0.00170794
EME1	c.897G>A	p.P299=	0.0001506	0.0001504			Unknown	2	0.00170794
RHBDF2	c.422G>A	p.R141H	0.000105	0.0001535	deleterious(0.04)	benign(0.178)	VUS	2	0.00170794
DICER1	c.1681A>G	p.I561V	5.649e-05	5.688e-05	tolerated(0.82)	benign(0)	Benign	2	0.00170794
BUB1B	c.2856C>T	p.D952=	0.02211	0.02393			Unknown	2	0.00170794
EME2	c.624C>G	p.A208=	5.654e-05	9.447e-05			Unknown	2	0.00170794
POLH	c.1406C>T	p.A469V	4.708e-05	3.663e-05	tolerated(0.41)	benign(0)	Benign	2	0.00170794
ATR	c.5756T>C	p.M1919T	7.532e-05	6.506e-05	tolerated(0.29)	benign(0.288)	Benign	2	0.00170794
FANCA	c.3625G>A	p.D1209N	9.415e-06	1.235e-05	tolerated(0.13)	benign(0.001)	Benign	2	0.00170794
PRKDC	c.1196A>G	p.Q399R	-	4.061e-06	deleterious(0.03)	benign(0.211)	VUS	2	0.00170794
FH	c.415G>A	p.V139M	4.708e-05	3.663e-05	deleterious(0)	probably_damaging(0.965)	Harmful	2	0.00170794
GPC3	c.358C>T	p.R120C	0.0004708	0.0003762	deleterious(0)	probably_damaging(0.985)	Harmful	2	0.00170794
EPAS1	c.1556C>T	p.T519M	3.766e-05	4.949e-05	tolerated(0.3)	benign(0.091)	Benign	2	0.00170794
MSH3	c.178_186del	p.A60_A62del	0.01183	0.008914			Unknown	2	0.00170794
MSH3	c.653C>T	p.S218F	3.766e-05	2.437e-05	deleterious(0.05)	benign(0.047)	Benign	2	0.00170794
PMS2	c.447C>T	p.Y149=	-	4.067e-06			Unknown	2	0.00170794
RPA1	c.478G>C	p.G160R	6.591e-05	7.312e-05	tolerated(0.17)	benign(0.035)	Benign	2	0.00170794
CDK12	c.1782T>C	p.A594=	9.415e-05	4.061e-05			Unknown	2	0.00170794
TSHR	c.1377G>T	p.A459=	2.825e-05	2.031e-05			Unknown	2	0.00170794
BUB1	c.942C>G	p.S314=	0.0004239	0.0005952			Unknown	2	0.00170794
NF1	c.2033C>T	p.P678L	0.0003295	0.0002485	tolerated_low_confidence(0.2)	benign(0.058)	Benign	2	0.00170794
PDGFRA	c.1202C>A	p.A401D	9.415e-05	0.0001301	tolerated(1)	benign(0)	Benign	2	0.00170794
MEN1	c.1018C>A	p.R340=	0.0001412	0.000134			Unknown	2	0.00170794
PALB2	c.1054G>C	p.E352Q	9.415e-05	6.094e-05	tolerated(0.12)	possibly_damaging(0.59)	VUS	2	0.00170794
EME2	c.1091T>C	p.L364P	-	-	deleterious(0)	probably_damaging(0.986)	Harmful	2	0.00170794
DICER1	c.2038G>A	p.V680I	5.649e-05	5.282e-05	tolerated(0.28)	benign(0.186)	Benign	2	0.00170794
BRCA1	c.2931A>G	p.P977=	2.825e-05	3.657e-05			Unknown	2	0.00170794
PHB	c.456C>T	p.D152=	4.708e-05	2.849e-05			Unknown	2	0.00170794
MLH3	c.193G>C	p.D65H	2.825e-05	1.627e-05	deleterious(0)	probably_damaging(0.999)	Harmful	2	0.00170794
BRCA1	c.1966A>T	p.N656Y	-	-	deleterious(0.01)	possibly_damaging(0.499)	Harmful	2	0.00170794
BLM	c.2049A>G	p.E683=	0.0001036	7.315e-05			Unknown	2	0.00170794
BRCA1	c.5317G>C	p.A1773P	-	-	deleterious(0)	probably_damaging(0.986)	Harmful	2	0.00170794
CHEK1	c.1134A>G	p.T378=	-	-			Unknown	2	0.00170794
FANCA	c.356C>G	p.S119C	2.825e-05	4.473e-05	tolerated(0.3)	benign(0.005)	Benign	2	0.00170794
EGFR	c.1554G>A	p.P518=	0.0002542	0.000199			Unknown	2	0.00170794
EME2	c.194G>A	p.R65Q	-	-	deleterious(0.03)	benign(0.071)	VUS	2	0.00170794
FANCG	c.1298G>A	p.R433Q	2.825e-05	3.249e-05	tolerated(0.5)	benign(0)	Benign	2	0.00170794
FANCD2	c.2058G>A	p.L686=	0.0001318	8.937e-05			Unknown	2	0.00170794
TP53BP1	c.3001A>G	p.T1001A	4.708e-05	4.061e-05	tolerated(0.19)	probably_damaging(0.987)	VUS	2	0.00170794
FANCM	c.5224A>G	p.I1742V	0.008144	0.008601	tolerated(1)	benign(0)	Benign	2	0.00170794
CDK6	c.936C>A	p.S312=	-	8.19e-06			Unknown	2	0.00170794
GPC3	c.1701G>A	p.P567=	3.766e-05	3.366e-05			Unknown	2	0.00170794
FANCA	c.1413C>T	p.V471=	0.0001036	7.311e-05			Unknown	2	0.00170794
EXT2	c.1299C>A	p.F433L	2.825e-05	8.528e-05	tolerated(0.09)	benign(0.159)	Benign	2	0.00170794
KIT	c.978C>T	p.N326=	5.649e-05	8.954e-05			Unknown	2	0.00170794
TMEM127	c.384C>T	p.R128=	-	8.123e-06			Unknown	2	0.00170794
POLN	c.858G>A	p.E286=	1.883e-05	2.037e-05			Unknown	2	0.00170794
FANCD2	c.3276T>C	p.H1092=	4.708e-05	3.655e-05			Unknown	2	0.00170794
CDH1	c.1103C>T	p.T368I	-	-	tolerated(0.49)	benign(0)	Benign	2	0.00170794
FANCE	c.742G>A	p.A248T	-	4.068e-06	tolerated(0.34)	benign(0.001)	Benign	2	0.00170794
PMS2	c.2008A>G	p.K670E	-	-	deleterious(0)	probably_damaging(0.987)	Harmful	2	0.00170794
FLCN	c.1283C>T	p.P428L	4.708e-05	2.462e-05	tolerated(0.36)	benign(0)	Benign	2	0.00170794
ENG	c.1883C>T	p.A628V	1.123e-05	3.528e-05	deleterious(0)	possibly_damaging(0.774)	Harmful	2	0.00170794
SLX4	c.5248G>T	p.A1750S	0.0001789	0.000159	deleterious(0.01)	benign(0.212)	VUS	2	0.00170794
POLE	c.2540G>A	p.R847Q	8.474e-05	8.937e-05	deleterious(0)	probably_damaging(0.999)	Harmful	2	0.00170794
RECQL4	c.891C>T	p.D297=	0.0007947	0.0006723			Unknown	2	0.00170794
ERCC5	c.876A>G	p.I292M	6.591e-05	0.0001016	deleterious(0)	probably_damaging(0.999)	Harmful	2	0.00170794
PRKDC	c.6997A>G	p.K2333E	-	-	tolerated(1)	benign(0.003)	Benign	2	0.00170794
FANCG	c.55A>G	p.K19E	0.0001412	0.0001145	tolerated(0.58)	benign(0.014)	Benign	2	0.00170794
MSH3	c.156A>G	p.A52=	1.609e-05	-			Unknown	2	0.00170794
PMS1	c.726G>A	p.K242=	0.0001412	9.759e-05			Unknown	2	0.00170794
KIT	c.288G>A	p.T96=	5.649e-05	3.252e-05			Unknown	2	0.00170794
PMS2	c.1488C>T	p.H496=	0.007645	0.005805			Unknown	2	0.00170794
REV3L	c.2548A>T	p.T850S	2.825e-05	2.861e-05	tolerated(0.34)	benign(0.015)	Benign	2	0.00170794
NTHL1	c.98G>A	p.R33K	0.0003918	0.0004978	tolerated_low_confidence(1)	benign(0)	Benign	2	0.00170794
MLH3	c.3716-4A>G	-	6.591e-05	6.093e-05			Unknown	2	0.00170794
MXI1	c.401C>T	p.A134V	9.415e-06	8.126e-06	tolerated(0.37)	benign(0.028)	Benign	2	0.00170794
POLH	c.1936G>T	p.D646Y	9.415e-06	1.219e-05	deleterious(0)	benign(0.235)	VUS	2	0.00170794
FANCD2	c.2883G>A	p.G961=	-	-			Unknown	2	0.00170794
SLX4	c.4649G>A	p.R1550Q	0.0001695	0.0001056	tolerated(0.41)	benign(0.013)	Benign	2	0.00170794
MSR1	c.901C>T	p.P301S	3.767e-05	3.48e-05	tolerated(0.25)	benign(0.129)	Benign	2	0.00170794
CDKN1B	c.225G>C	p.E75D	0.0001224	0.0001137	tolerated(0.11)	benign(0.066)	Benign	2	0.00170794
NF1	c.7851G>T	p.A2617=	2.825e-05	4.883e-05			Unknown	2	0.00170794
DICER1	c.3227G>A	p.S1076N	3.766e-05	3.657e-05	tolerated(0.52)	benign(0.006)	Benign	2	0.00170794
PDGFRA	c.1296G>A	p.T432=	0.0001318	0.0002073			Unknown	2	0.00170794
FLCN	c.592G>A	p.D198N	0.0001318	0.0001347	tolerated(0.29)	benign(0.003)	Benign	2	0.00170794
FANCC	c.436_438del	p.Y146del	4.708e-05	4.066e-05			Unknown	2	0.00170794
BRCA2	c.4376A>G	p.N1459S	2.825e-05	3.738e-05	tolerated(0.39)	benign(0.03)	Benign	2	0.00170794
MLH1	c.462C>T	p.D154=	2.825e-05	2.438e-05			Unknown	2	0.00170794
TSHR	c.2098A>G	p.K700E	7.532e-05	0.0001137	tolerated(1)	benign(0.009)	Benign	2	0.00170794
FANCD2	c.144T>A	p.F48L	4.709e-05	3.253e-05	tolerated(0.13)	probably_damaging(0.999)	VUS	2	0.00170794
GPC3	c.367A>G	p.K123E	3.766e-05	1.733e-05	tolerated(1)	benign(0.007)	Benign	2	0.00170794
PRKDC	c.4404G>A	p.P1468=	7.671e-05	7.606e-05			Unknown	2	0.00170794
SLX1B	c.639G>T	p.V213=	-	-			Unknown	2	0.00170794
CDH1	c.2079C>T	p.G693=	3.766e-05	2.437e-05			Unknown	2	0.00170794
PALLD	c.3365G>A	p.R1122Q	0.0001318	0.0001017	deleterious(0.03)	benign(0)	VUS	2	0.00170794
GEN1	c.2501_2504del	p.E834Vfs*6	-	2.037e-05			Unknown	2	0.00170794
PALB2	c.1037_1041del	p.K346Tfs*13	-	-			Unknown	2	0.00170794
MSH6	c.2561A>T	p.K854M	0.0004239	0.0003834	deleterious(0.01)	probably_damaging(0.997)	Harmful	2	0.00170794
GEN1	c.2527C>T	p.P843S	3.766e-05	2.852e-05	tolerated(0.5)	benign(0)	Benign	2	0.00170794
CHEK2	c.671G>A	p.R224H	0.0001036	0.00013	tolerated(0.51)	benign(0.027)	Benign	2	0.00170794
PRSS1	c.162C>G	p.N54K	0.03195	0.0001794	deleterious(0.01)	benign(0.22)	VUS	2	0.00170794
BRCA2	c.6405_6409del	p.N2135Kfs*3	-	4.23e-06			Unknown	2	0.00170794
MC1R	c.309C>T	p.A103=	0.000537	0.0005889			Unknown	2	0.00170794
FANCC	c.1595G>A	p.R532K	7.532e-05	8.53e-05	deleterious(0.01)	probably_damaging(0.992)	Harmful	2	0.00170794
SLX4	c.1271C>T	p.A424V	0.0002825	0.000195	deleterious(0)	probably_damaging(0.998)	Harmful	2	0.00170794
FANCA	c.1874G>A	p.C625Y	2.825e-05	2.048e-05	deleterious(0)	probably_damaging(0.915)	Harmful	2	0.00170794
NTRK1	c.2303C>T	p.P768L	1.884e-05	1.696e-05	deleterious(0)	probably_damaging(1)	Harmful	2	0.00170794
MET	c.1263C>T	p.T421=	0.0001988	0.0001707			Unknown	2	0.00170794
ERCC2	c.1665+4C>T	-	8.474e-05	0.0001057			Unknown	2	0.00170794
POLE	c.6716C>T	p.A2239V	5.649e-05	4.88e-05	deleterious(0)	probably_damaging(0.921)	Harmful	2	0.00170794
CDH1	c.604G>A	p.V202I	0.0006685	0.0005082	tolerated(0.19)	benign(0.058)	Benign	2	0.00170794
POLD1	c.663C>A	p.A221=	0.0001989	0.0001712			Unknown	2	0.00170794
FLCN	c.1428C>G	p.D476E	8.474e-05	5.687e-05	tolerated(0.39)	benign(0.275)	Benign	2	0.00170794
MSH6	c.1917G>A	p.E639=	6.591e-05	5.288e-05			Unknown	2	0.00170794
TERT	c.1564A>C	p.R522=	8.474e-05	6.528e-05			Unknown	2	0.00170794
FANCE	c.316C>T	p.R106W	0.0001506	0.0001016	tolerated(0.22)	benign(0)	Benign	2	0.00170794
BAP1	c.1536C>T	p.R512=	9.415e-06	1.625e-05			Unknown	2	0.00170794
PRSS1	c.158T>A	p.I53N	0.03408	0.000459	deleterious(0)	probably_damaging(0.998)	Harmful	2	0.00170794
MSH6	c.2503C>G	p.Q835E	-	4.098e-06	tolerated(0.34)	benign(0.065)	Benign	2	0.00170794
RECQL4	c.2406G>A	p.V802=	2.858e-05	3.174e-05			Unknown	2	0.00170794
EZH2	c.305A>G	p.N102S	-	-	tolerated(0.12)	benign(0.098)	Benign	2	0.00170794
RECQL4	c.1398G>A	p.P466=	0.0009278	0.001223			Unknown	2	0.00170794
TSHR	c.1576G>A	p.A526T	4.708e-05	2.438e-05	deleterious(0)	probably_damaging(0.999)	Harmful	2	0.00170794
RAD51	c.612C>T	p.L204=	-	4.061e-06			Unknown	2	0.00170794
POLE	c.1026T>C	p.H342=	-	8.121e-06			Unknown	2	0.00170794
POLE	c.1007A>G	p.N336S	0.002712	0.001958	deleterious(0)	probably_damaging(1)	Harmful	2	0.00170794
RHBDF2	c.1726A>G	p.I576V	1.883e-05	1.25e-05	tolerated(0.15)	benign(0.085)	Benign	2	0.00170794
PRKDC	c.2919G>A	p.A973=	0.0001608	0.0001219			Unknown	2	0.00170794
DIRC2	c.106_108dup	p.A36dup	1.355e-05	6.787e-05			Unknown	2	0.00170794
DIRC2	c.525T>A	p.S175=	4.708e-05	5.283e-05			Unknown	2	0.00170794
EME2	c.895C>T	p.Q299*	1.884e-05	1.647e-05			Unknown	2	0.00170794
TRIM24	c.936T>C	p.A312=	0.0001036	0.000118			Unknown	2	0.00170794
SMARCA4	c.1209G>A	p.E403=	0.0001224	0.0001381			Unknown	2	0.00170794
FANCM	c.2852A>G	p.D951G	9.419e-06	4.077e-06	tolerated(0.06)	possibly_damaging(0.815)	VUS	2	0.00170794
ATRX	c.5948T>C	p.L1983P	-	-	tolerated(0.36)	benign(0.001)	Benign	2	0.00170794
RAD54B	c.2290C>T	p.H764Y	9.416e-06	1.23e-05	tolerated(0.17)	benign(0.243)	Benign	2	0.00170794
ATR	c.7407T>C	p.Y2469=	0.0001224	0.00013			Unknown	2	0.00170794
MSR1	c.1113G>A	p.W371*	-	4.061e-06			Unknown	2	0.00170794
BRCA1	c.5158C>T	p.R1720W	9.415e-06	2.438e-05	deleterious(0)	probably_damaging(1)	Harmful	2	0.00170794
ERCC2	c.1842C>T	p.Y614=	0.000273	0.0002846			Unknown	2	0.00170794
RECQL4	c.3531C>T	p.Y1177=	0.0005586	0.0004			Unknown	2	0.00170794
RAD51	c.289C>T	p.R97C	0.007384	0.002223	deleterious(0.01)	probably_damaging(0.979)	Harmful	2	0.00170794
DIS3L2	c.2628C>T	p.D876=	9.454e-06	4.203e-06			Unknown	2	0.00170794
PRKDC	c.937C>T	p.L313F	9.468e-06	8.157e-06	tolerated(0.64)	benign(0.005)	Benign	2	0.00170794
RHBDF2	c.2049C>T	p.D683=	0.0001036	0.0001023			Unknown	2	0.00170794
PTCH1	c.37C>G	p.R13G	8.145e-05	0.0007835	tolerated_low_confidence(0.37)	benign(0)	Benign	2	0.00170794
POLD1	c.2763C>T	p.R921=	7.699e-05	6.655e-05			Unknown	2	0.00170794
POLN	c.1873T>C	p.S625P	4.708e-05	4.499e-05	deleterious(0.01)	probably_damaging(0.998)	Harmful	2	0.00170794
STK11	c.1217C>T	p.A406V	3.834e-05	2.993e-05	tolerated(0.25)	benign(0)	Benign	2	0.00170794
ERCC2	c.2127C>T	p.T709=	0.000386	0.0002965			Unknown	2	0.00170794
XPC	c.2514+6C>T	-	4.725e-05	6.462e-05			Unknown	2	0.00170794
PTCH1	c.3913G>T	p.D1305Y	0.0001323	0.0001236	deleterious_low_confidence(0)	benign(0.141)	VUS	2	0.00170794
PTCH1	c.94A>G	p.R32G	-	-	tolerated_low_confidence(0.53)	benign(0)	Benign	2	0.00170794
FANCL	c.155+7T>C	-	6.591e-05	5.694e-05			Unknown	2	0.00170794
BARD1	c.2179G>A	p.D727N	2.825e-05	4.47e-05	tolerated(0.31)	benign(0.009)	Benign	2	0.00170794
WRN	c.1458G>C	p.T486=	7.532e-05	7.332e-05			Unknown	2	0.00170794
PALB2	c.2329G>A	p.D777N	1.883e-05	1.625e-05	tolerated(0.94)	benign(0.003)	Benign	2	0.00170794
BARD1	c.420_422del	p.K140del	-	-			Unknown	2	0.00170794
POLQ	c.4765A>G	p.R1589G	-	-	tolerated_low_confidence(0.41)	benign(0)	Benign	2	0.00170794
APC	c.5424C>T	p.N1808=	9.417e-06	2.043e-05			Unknown	2	0.00170794
MDH2	c.429G>A	p.P143=	0.01874	0.01782			Unknown	2	0.00170794
MSH2	c.1480T>C	p.S494P	3.766e-05	2.438e-05	tolerated(0.06)	possibly_damaging(0.611)	VUS	2	0.00170794
KLLN	c.267T>A	p.S89=	0.0001122	3.363e-05			Unknown	2	0.00170794
REV3L	c.4192G>A	p.G1398R	3.766e-05	2.441e-05	deleterious_low_confidence(0.02)	probably_damaging(0.999)	Harmful	2	0.00170794
RET	c.355C>T	p.L119F	-	-	tolerated_low_confidence(0.29)	benign(0.18)	Benign	2	0.00170794
BARD1	c.783A>G	p.L261=	3.767e-05	4.019e-05			Unknown	2	0.00170794
MLH1	c.1742C>T	p.P581L	0.0001412	0.0001504	deleterious(0.04)	possibly_damaging(0.552)	Harmful	2	0.00170794
MUTYH	c.183C>T	p.A61=	9.415e-06	4.071e-06			Unknown	2	0.00170794
TMEM127	c.494A>G	p.H165R	5.649e-05	6.091e-05	tolerated(0.52)	probably_damaging(0.923)	VUS	2	0.00170794
MSH6	c.3245C>T	p.P1082L	0.0001224	0.0003331	deleterious(0)	benign(0.147)	VUS	2	0.00170794
HNF1B	c.174C>T	p.T58=	2.825e-05	2.038e-05			Unknown	2	0.00170794
HNF1A	c.348G>A	p.A116=	9.415e-06	8.125e-06			Unknown	2	0.00170794
POLN	c.1152A>G	p.T384=	1.883e-05	1.22e-05			Unknown	2	0.00170794
TP53BP1	c.93G>A	p.Q31=	1.883e-05	8.122e-06			Unknown	2	0.00170794
RECQL4	c.1621-8A>G	-	0.001135	0.00136			Unknown	2	0.00170794
XPC	c.1267C>T	p.R423W	1.892e-05	1.625e-05	deleterious(0)	possibly_damaging(0.72)	Harmful	2	0.00170794
ATM	c.3963G>A	p.M1321I	5.649e-05	0.0001179	tolerated(0.44)	benign(0.001)	Benign	2	0.00170794
TSC2	c.4030_4032del	p.E1344del	5.658e-05	9.941e-05			Unknown	2	0.00170794
PTCH1	c.3845C>T	p.P1282L	0.002575	0.002237	tolerated_low_confidence(0.1)	benign(0.028)	Benign	2	0.00170794
DIS3L2	c.1599C>T	p.H533=	0.0001134	0.0001342			Unknown	2	0.00170794
FANCM	c.996T>C	p.Y332=	3.766e-05	8.535e-05			Unknown	2	0.00170794
BMPR1A	c.350A>G	p.Q117R	-	-	tolerated(0.6)	benign(0.003)	Benign	2	0.00170794
SDHA	c.113A>T	p.D38V	0.03463	0.0353	tolerated_low_confidence(0.42)	benign(0)	Benign	2	0.00170794
ENG	c.225G>A	p.P75=	0.0003578	0.0003292			Unknown	2	0.00170794
FANCD2	c.4128_4131dup	p.N1378Sfs*5	-	-			Unknown	2	0.00170794
PTCH2	c.2260C>T	p.R754C	1.883e-05	8.128e-06	deleterious(0.01)	possibly_damaging(0.676)	Harmful	2	0.00170794
EMSY	c.1510A>G	p.T504A	-	8.157e-06	tolerated(0.13)	benign(0.003)	Benign	2	0.00170794
RAD50	c.3561G>A	p.V1187=	2.825e-05	2.843e-05			Unknown	2	0.00170794
CEP57	c.426A>G	p.L142=	0.0001412	0.0001469			Unknown	2	0.00170794
CEP57	c.504+4A>G	-	-	-			Unknown	2	0.00170794
WRN	c.2342C>T	p.T781I	0.000226	0.0002113	deleterious(0.01)	benign(0.325)	VUS	2	0.00170794
XRCC3	c.240G>A	p.Q80=	-	1.382e-05			Unknown	2	0.00170794
REV3L	c.315A>T	p.S105=	1.883e-05	3.276e-05			Unknown	2	0.00170794
MET	c.2785-8A>T	-	2.84e-05	4.475e-05			Unknown	2	0.00170794
MITF	c.232C>A	p.Q78K	9.437e-06	8.132e-06	deleterious(0.05)	benign(0.098)	Benign	2	0.00170794
SMARCB1	c.69C>G	p.G23=	2.825e-05	3.315e-05			Unknown	2	0.00170794
CDH1	c.163+8C>A	-	-	-			Unknown	2	0.00170794
ENG	c.841A>G	p.I281V	9.415e-06	1.219e-05	tolerated(0.19)	probably_damaging(0.952)	VUS	2	0.00170794
APC	c.1685C>T	p.T562M	1.883e-05	6.096e-05	deleterious(0.01)	benign(0.432)	VUS	2	0.00170794
ATR	c.196G>A	p.V66M	3.766e-05	3.249e-05	tolerated_low_confidence(0.1)	probably_damaging(0.997)	VUS	2	0.00170794
POLQ	c.1400G>A	p.R467Q	1.883e-05	2.844e-05	tolerated(0.34)	benign(0.009)	Benign	2	0.00170794
POLE	c.6597C>T	p.I2199=	0.0002166	0.0002278			Unknown	2	0.00170794
SDHA	c.1394G>A	p.R465Q	0.01774	4.999e-05	deleterious_low_confidence(0.03)	benign(0.304)	VUS	2	0.00170794
NTRK1	c.824A>C	p.E275A	0.0001506	0.0001462	deleterious(0.02)	possibly_damaging(0.563)	Harmful	2	0.00170794
HNF1B	c.1167G>T	p.L389=	-	-			Unknown	2	0.00170794
TSC2	c.2365G>A	p.V789I	4.708e-05	4.499e-05	tolerated(0.58)	probably_damaging(0.97)	VUS	2	0.00170794
PRKDC	c.4161C>T	p.D1387=	2.838e-05	2.437e-05			Unknown	2	0.00170794
PHOX2B	c.786C>G	p.G262=	-	-			Unknown	2	0.00170794
CDH1	c.1296C>G	p.N432K	2.825e-05	2.436e-05	deleterious(0.01)	probably_damaging(1)	Harmful	2	0.00170794
FANCC	c.1248C>T	p.A416=	3.766e-05	2.031e-05			Unknown	2	0.00170794
SMARCA4	c.3975C>T	p.R1325=	0.0001044	0.0001911			Unknown	2	0.00170794
CHEK2	c.1046G>C	p.G349A	5.649e-05	4.472e-05	deleterious(0)	probably_damaging(0.997)	Harmful	2	0.00170794
BRCA1	c.5135C>A	p.T1712K	-	-	deleterious(0)	possibly_damaging(0.808)	Harmful	2	0.00170794
SDHC	c.250C>T	p.L84F	-	-	tolerated(0.13)	benign(0.127)	Benign	2	0.00170794
PRKDC	c.11079C>G	p.F3693L	-	4.062e-06	tolerated(0.58)	benign(0.012)	Benign	2	0.00170794
CFTR	c.3289C>T	p.R1097C	0.0001884	0.0002603	deleterious(0)	probably_damaging(1)	Harmful	2	0.00170794
SDHAF2	c.271A>G	p.K91E	-	-	deleterious(0.04)	probably_damaging(0.996)	Harmful	2	0.00170794
PRKDC	c.5757C>T	p.Y1919=	0.0001418	0.0001093			Unknown	2	0.00170794
TSC2	c.3803G>A	p.R1268H	0.0002542	0.0001631	deleterious_low_confidence(0.01)	probably_damaging(0.984)	Harmful	2	0.00170794
MRE11A	c.863G>A	p.R288H	3.766e-05	4.889e-05	tolerated(0.38)	benign(0)	Benign	2	0.00170794
CDK6	c.468C>T	p.S156=	1.883e-05	1.219e-05			Unknown	2	0.00170794
POLE	c.1924-6T>C	-	3.766e-05	4.877e-05			Unknown	2	0.00170794
AR	c.2659A>G	p.M887V	4.708e-05	0.0001237	tolerated(0.14)	benign(0)	Benign	2	0.00170794
SMARCA4	c.3216-8C>T	-	2.825e-05	4.061e-05			Unknown	2	0.00170794
GALNT12	c.72C>G	p.L24=	-	-			Unknown	2	0.00170794
ALK	c.2904A>G	p.P968=	3.766e-05	3.249e-05			Unknown	2	0.00170794
WT1	c.258G>A	p.L86=	-	3.098e-05			Unknown	2	0.00170794
PMS1	c.2755C>T	p.R919C	0.0002354	0.0003048	deleterious(0)	probably_damaging(0.98)	Harmful	2	0.00170794
DIRC2	c.409C>T	p.P137S	-	4.077e-06	tolerated(0.17)	possibly_damaging(0.539)	VUS	2	0.00170794
CDK12	c.3734C>G	p.P1245R	9.432e-06	1.862e-05	deleterious_low_confidence(0)	possibly_damaging(0.799)	Harmful	2	0.00170794
MRE11A	c.310A>T	p.S104C	9.416e-06	4.07e-06	tolerated(0.08)	possibly_damaging(0.502)	VUS	2	0.00170794
ERCC4	c.105C>T	p.C35=	4.709e-05	3.351e-05			Unknown	2	0.00170794
MUS81	c.788G>A	p.R263K	1.883e-05	3.658e-05	tolerated(0.91)	benign(0.007)	Benign	2	0.00170794
BRCA1	c.427G>A	p.E143K	9.415e-05	8.541e-05	tolerated(0.11)	benign(0.02)	Benign	2	0.00170794
BARD1	c.722C>G	p.S241C	0.0001884	0.0001277	deleterious(0)	possibly_damaging(0.903)	Harmful	2	0.00170794
EXT2	c.2018G>A	p.G673E	-	-	deleterious(0.01)	probably_damaging(0.999)	Harmful	2	0.00170794
PRKDC	c.5435G>A	p.S1812N	9.463e-06	2.126e-05	tolerated(1)	benign(0.003)	Benign	2	0.00170794
POLE	c.2083T>A	p.F695I	0.01046	0.01123	tolerated(0.06)	benign(0.329)	Benign	2	0.00170794
BLM	c.3948C>A	p.D1316E	-	4.062e-06	tolerated(0.53)	benign(0.001)	Benign	2	0.00170794
GALNT12	c.501G>T	p.L167=	3.766e-05	4.061e-05			Unknown	2	0.00170794
RAD54B	c.1775G>A	p.C592Y	1.883e-05	3.253e-05	deleterious(0)	probably_damaging(0.998)	Harmful	2	0.00170794
FANCL	c.21C>G	p.S7R	2.825e-05	1.219e-05	tolerated_low_confidence(0.05)	benign(0.219)	Benign	2	0.00170794
HMMR	c.463-8G>A	-	-	8.216e-06			Unknown	2	0.00170794
FANCA	c.596+5C>T	-	4.708e-05	5.279e-05			Unknown	2	0.00170794
XPA	c.172+7G>A	-	5.242e-05	7.649e-05			Unknown	2	0.00170794
SLX4	c.4504A>C	p.R1502=	-	-			Unknown	2	0.00170794
MSH6	c.3801+4T>C	-	6.591e-05	5.691e-05			Unknown	2	0.00170794
EGFR	c.1632-5C>T	-	-	-			Unknown	2	0.00170794
ERCC2	c.216C>T	p.Y72=	5.649e-05	8.121e-05			Unknown	2	0.00170794
CDKN1B	c.258G>A	p.E86=	0.0001977	0.0001421			Unknown	2	0.00170794
EMSY	c.2861T>G	p.L954R	0.002137	0.002558	deleterious_low_confidence(0.03)	benign(0.058)	VUS	2	0.00170794
RECQL4	c.1903C>T	p.H635Y	-	1.439e-05	deleterious(0)	possibly_damaging(0.782)	Harmful	2	0.00170794
TP53BP1	c.2556C>T	p.D852=	3.766e-05	4.061e-05			Unknown	2	0.00170794
SLX4	c.2181C>T	p.S727=	0.0001601	0.0001186			Unknown	2	0.00170794
TSC2	c.4302C>T	p.G1434=	0.0005285	0.0004468			Unknown	2	0.00170794
BRCA1	c.3435T>C	p.V1145=	-	4.065e-06			Unknown	2	0.00170794
APC	c.1276G>T	p.A426S	0.0001036	9.374e-05	tolerated(0.64)	benign(0.015)	Benign	2	0.00170794
REV3L	c.455C>T	p.P152L	-	-	deleterious(0)	probably_damaging(0.974)	Harmful	2	0.00170794
PRKDC	c.10668-7T>A	-	9.475e-06	1.436e-05			Unknown	2	0.00170794
ALK	c.2505G>A	p.P835=	5.649e-05	6.092e-05			Unknown	2	0.00170794
RHBDF2	c.77A>G	p.N26S	-	-	tolerated_low_confidence(0.45)	benign(0.031)	Benign	2	0.00170794
POLE	c.712A>T	p.I238F	4.708e-05	5.28e-05	deleterious(0)	probably_damaging(0.976)	Harmful	2	0.00170794
PRKDC	c.8983C>T	p.L2995F	0.0001232	0.0001024	tolerated(0.12)	possibly_damaging(0.807)	VUS	2	0.00170794
TERT	c.193C>G	p.P65A	1.298e-05	8.645e-06	tolerated(0.1)	benign(0.007)	Benign	2	0.00170794
BRCA1	c.4132del	p.V1378Sfs*15	-	-			Unknown	2	0.00170794
FANCD2	c.864C>T	p.S288=	0.0001224	0.0001544			Unknown	2	0.00170794
CFTR	c.1210-6T>A	-	8.479e-05	4.134e-05			Unknown	2	0.00170794
ERCC5	c.3253G>A	p.G1085S	1.883e-05	1.63e-05	deleterious(0)	possibly_damaging(0.816)	Harmful	2	0.00170794
ERCC2	c.467G>A	p.R156Q	4.708e-05	4.481e-05	tolerated(0.6)	benign(0)	Benign	2	0.00170794
ERCC3	c.1372G>T	p.V458L	-	-	deleterious(0.05)	benign(0.035)	Benign	2	0.00170794
POLE	c.6475C>T	p.R2159C	9.415e-06	1.644e-05	deleterious(0.01)	benign(0)	VUS	2	0.00170794
POLG	c.3198G>A	p.T1066=	0.006214	0.006044			Unknown	2	0.00170794
ATM	c.4358T>G	p.I1453R	1.883e-05	4.066e-06	deleterious(0)	benign(0.278)	VUS	2	0.00170794
POLG	c.3615G>A	p.G1205=	-	-			Unknown	2	0.00170794
SLX4	ENST00000294008.3:c.4618G>A	p.E1540K	.	-	tolerated(0.23)	benign(0.004)	Benign	2	0.00170794
TP53	c.214C>G	p.P72A	9.416e-06	1.218e-05	tolerated(0.94)	benign(0)	Benign	2	0.00170794
SLX4	c.5372G>A	p.R1791H	0.0005367	0.0003827	tolerated(0.28)	benign(0.003)	Benign	2	0.00170794
FANCM	c.876G>T	p.P292=	0.0002166	0.0001666			Unknown	2	0.00170794
PRKDC	c.9099A>G	p.P3033=	-	-			Unknown	2	0.00170794
TSC2	c.-30+25_-30+45del	-	-	-			Unknown	2	0.00170794
MUTYH	c.340-3C>G	-	9.415e-06	4.062e-06			Unknown	2	0.00170794
MET	c.2754G>T	p.L918=	-	-			Unknown	2	0.00170794
RPA1	c.846C>T	p.N282=	0.0001318	0.0001218			Unknown	2	0.00170794
BRCA2	c.7521A>G	p.P2507=	4.708e-05	3.25e-05			Unknown	2	0.00170794
RAD54L	c.366G>A	p.E122=	0.001911	0.001576			Unknown	2	0.00170794
POLH	c.1266T>C	p.L422=	-	8.127e-06			Unknown	2	0.00170794
XPC	c.2060G>C	p.R687T	-	-	deleterious(0)	benign(0.219)	VUS	2	0.00170794
HMMR	c.959A>C	p.Q320P	2.825e-05	8.185e-06	deleterious(0.02)	probably_damaging(0.943)	Harmful	2	0.00170794
MSH6	c.532C>T	p.R178C	-	1.625e-05	tolerated(0.06)	benign(0.328)	Benign	2	0.00170794
RPA1	c.346G>C	p.V116L	1.883e-05	8.122e-06	tolerated(0.11)	benign(0)	Benign	2	0.00170794
PTCH1	c.1275G>A	p.T425=	0.0001036	0.0001015			Unknown	2	0.00170794
MEN1	c.1449C>T	p.G483=	0.0001452	0.0001798			Unknown	2	0.00170794
NF2	c.459C>T	p.Y153=	4.708e-05	2.438e-05			Unknown	2	0.00170794
POLD1	c.3129T>C	p.H1043=	-	-			Unknown	2	0.00170794
WRN	c.3899C>T	p.P1300L	1.883e-05	8.129e-06	deleterious(0)	possibly_damaging(0.521)	Harmful	2	0.00170794
MC1R	c.23G>A	p.R8K	5.707e-05	5.666e-05	tolerated(0.35)	benign(0.005)	Benign	2	0.00170794
POLQ	c.2532G>A	p.K844=	0.0001036	0.0001224			Unknown	2	0.00170794
CEP57	c.502C>A	p.Q168K	-	-	deleterious(0)	probably_damaging(0.987)	Harmful	2	0.00170794
ERCC2	c.2034C>T	p.V678=	9.415e-06	8.125e-06			Unknown	2	0.00170794
RAD51C	c.1027-1G>T	p.X343_splice	-	-			Unknown	2	0.00170794
TSHR	c.394G>C	p.G132R	3.766e-05	4.104e-05	tolerated(0.15)	benign(0.341)	Benign	2	0.00170794
ERCC5	c.2208G>C	p.L736F	0.0001224	9.343e-05	deleterious(0)	probably_damaging(0.996)	Harmful	2	0.00170794
RECQL4	c.2264G>A	p.R755Q	0	8.789e-05	deleterious(0.05)	possibly_damaging(0.79)	VUS	2	0.00170794
EPAS1	c.1948A>C	p.T650P	1.886e-05	4.881e-05	tolerated(0.22)	benign(0)	Benign	2	0.00170794
CFTR	c.1210-4dup	-	-	-			Unknown	2	0.00170794
BRCA2	c.6486_6489del	p.K2162Nfs*5	9.416e-06	8.785e-06			Unknown	2	0.00170794
SLX4	c.4856C>T	p.P1619L	0.0001036	0.000122	tolerated(0.94)	benign(0)	Benign	2	0.00170794
RPA1	c.362-6C>G	-	-	-			Unknown	2	0.00170794
MSH3	c.3000T>G	p.D1000E	8.474e-05	9.366e-05	tolerated(0.27)	benign(0.359)	Benign	2	0.00170794
NTRK1	c.1732G>A	p.V578I	9.415e-06	1.222e-05	deleterious(0.04)	probably_damaging(0.994)	Harmful	2	0.00170794
POLE	c.6668A>G	p.K2223R	0.0001977	0.000167	tolerated(0.27)	possibly_damaging(0.523)	VUS	2	0.00170794
PTCH1	c.3692T>C	p.V1231A	0.001912	0.001678	tolerated(0.2)	benign(0.079)	Benign	2	0.00170794
FANCA	c.4168-8C>G	-	-	4.061e-06			Unknown	2	0.00170794
BRCA2	c.5634C>T	p.N1878=	7.533e-05	6.567e-05			Unknown	2	0.00170794
BRCA1	c.3756_3759del	p.S1253Rfs*10	-	1.626e-05			Unknown	2	0.00170794
APC	c.3378C>G	p.S1126R	5.649e-05	4.483e-05	deleterious_low_confidence(0.01)	benign(0.031)	VUS	2	0.00170794
POLN	c.2382G>A	p.T794=	3.766e-05	4.88e-05			Unknown	2	0.00170794
EXT1	c.200C>A	p.P67H	1.883e-05	4.065e-06	tolerated(0.05)	benign(0.17)	Benign	2	0.00170794
PRKDC	c.9252G>T	p.E3084D	8.518e-05	6.922e-05	deleterious(0)	probably_damaging(0.997)	Harmful	2	0.00170794
EGFR	c.716G>C	p.G239A	-	8.136e-06	deleterious(0)	probably_damaging(0.997)	Harmful	2	0.00170794
MSH3	c.1430C>T	p.A477V	9.415e-06	4.064e-06	deleterious(0.05)	benign(0.007)	Benign	2	0.00170794
POLD1	c.2169C>T	p.F723=	1.883e-05	1.228e-05			Unknown	2	0.00170794
BRCA1	c.1299dup	p.S434Qfs*2	-	-			Unknown	2	0.00170794
CHEK2	c.1642T>A	p.S548T	4.893e-05	7.421e-05	tolerated(0.56)	benign(0.001)	Benign	2	0.00170794
VHL	c.93G>C	p.E31D	-	1.435e-05	tolerated_low_confidence(0.19)	benign(0)	Benign	2	0.00170794
FANCI	c.488C>A	p.T163N	2.825e-05	4.468e-05	tolerated(0.16)	benign(0.043)	Benign	2	0.00170794
SLX4	c.1641G>A	p.T547=	6.593e-05	8.321e-05			Unknown	2	0.00170794
BRCA1	c.3607C>T	p.R1203*	-	1.221e-05			Unknown	2	0.00170794
FANCD2	c.1546-7T>A	-	0.0001506	0.0001178			Unknown	2	0.00170794
RAD54B	c.1752T>C	p.C584=	-	-			Unknown	2	0.00170794
TP53BP1	c.1571C>A	p.T524K	-	4.062e-06	deleterious(0.02)	benign(0.116)	VUS	2	0.00170794
GEN1	c.824G>A	p.R275H	0.0002072	0.0001639	tolerated(0.56)	benign(0.017)	Benign	2	0.00170794
TP53BP1	c.788+7C>T	-	0.0001506	0.0001521			Unknown	2	0.00170794
MSH6	c.2169T>C	p.G723=	-	4.071e-06			Unknown	2	0.00170794
ATM	c.8120C>G	p.S2707C	9.415e-06	1.625e-05	deleterious(0.03)	probably_damaging(0.997)	Harmful	2	0.00170794
RAD51	c.227C>T	p.T76M	-	-	tolerated(0.06)	benign(0.007)	Benign	2	0.00170794
ATRX	c.3092G>T	p.G1031V	-	5.619e-06	tolerated_low_confidence(0.11)	benign(0.003)	Benign	2	0.00170794
MET	c.4208C>A	p.S1403Y	9.456e-06	1.221e-05	deleterious_low_confidence(0)	benign(0.019)	VUS	2	0.00170794
EGFR	c.1119G>A	p.P373=	0.001591	0.001994			Unknown	2	0.00170794
ERCC5	c.3239G>A	p.G1080E	0.0008097	0.0006858	tolerated(1)	benign(0)	Benign	2	0.00170794
PMS1	c.964A>G	p.K322E	9.421e-06	4.142e-06	deleterious(0)	benign(0.349)	VUS	2	0.00170794
ERCC5	c.314C>T	p.T105M	4.708e-05	3.25e-05	deleterious(0)	probably_damaging(0.999)	Harmful	2	0.00170794
TSC2	c.4047G>A	p.A1349=	9.422e-05	0.00011			Unknown	2	0.00170794
XPC	c.105T>A	p.D35E	0.0001996	0.0001543	tolerated_low_confidence(0.06)	benign(0.003)	Benign	2	0.00170794
HMMR	c.2071G>T	p.A691S	-	-	deleterious(0.02)	probably_damaging(0.996)	Harmful	2	0.00170794
PALB2	c.2360C>T	p.T787I	9.415e-06	6.498e-05	tolerated(0.14)	benign(0.07)	Benign	2	0.00170794
AKT1	c.958-6G>A	-	0.0001506	0.000114			Unknown	2	0.00170794
EGFR	c.1913C>T	p.T638M	2.825e-05	2.03e-05	tolerated(0.11)	benign(0)	Benign	2	0.00170794
MRE11A	c.677C>G	p.T226S	2.826e-05	1.228e-05	deleterious(0.03)	benign(0.08)	VUS	2	0.00170794
EPCAM	c.232C>G	p.L78V	4.708e-05	5.685e-05	tolerated(0.06)	benign(0.023)	Benign	2	0.00170794
RB1	c.1861C>A	p.R621S	0.0001224	0.000134	tolerated(0.85)	benign(0.009)	Benign	2	0.00170794
FANCC	c.1290C>T	p.Y430=	0.000113	9.758e-05			Unknown	2	0.00170794
BRCA1	c.1797T>C	p.N599=	1.883e-05	3.66e-05			Unknown	2	0.00170794
BRCA2	c.6323G>A	p.R2108H	0.001224	0.001132	tolerated(0.54)	benign(0.398)	Benign	2	0.00170794
MSH2	c.1854A>G	p.P618=	-	4.061e-06			Unknown	2	0.00170794
ALK	c.386G>T	p.G129V	3.868e-05	4.241e-05	tolerated_low_confidence(0.09)	benign(0.054)	Benign	2	0.00170794
POLG	c.1449C>T	p.P483=	8.474e-05	8.527e-05			Unknown	2	0.00170794
SLX4	c.3963G>A	p.P1321=	0.01072	0.009148			Unknown	2	0.00170794
KIT	c.2145C>T	p.S715=	4.708e-05	5.292e-05			Unknown	2	0.00170794
MSH6	c.3205G>C	p.G1069R	3.766e-05	2.032e-05	tolerated(0.07)	benign(0.223)	Benign	2	0.00170794
SLX4	c.2274G>A	p.A758=	-	8.145e-06			Unknown	2	0.00170794
KIF1B	c.3669A>T	p.P1223=	-	-			Unknown	2	0.00170794
BAP1	c.376-4G>A	-	0.0001318	0.0001259			Unknown	2	0.00170794
BRCA1	c.-19-3A>G	-	0.0001224	0.0001355			Unknown	2	0.00170794
SDHD	c.354T>G	p.D118E	-	4.072e-06	tolerated(0.34)	benign(0.006)	Benign	2	0.00170794
EGFR	c.2492G>A	p.R831H	6.591e-05	4.878e-05	tolerated(0.14)	benign(0.152)	Benign	2	0.00170794
EXT1	c.1161A>G	p.L387=	0.0001036	0.0001952			Unknown	2	0.00170794
CYLD	c.1454A>T	p.Y485F	-	-	tolerated(0.43)	benign(0.003)	Benign	2	0.00170794
RECQL4	c.603T>G	p.F201L	-	4.191e-06	tolerated(0.5)	benign(0.012)	Benign	2	0.00170794
POLQ	c.193G>A	p.E65K	-	-	tolerated(0.06)	benign(0.006)	Benign	2	0.00170794
FH	c.193G>A	p.D65N	3.766e-05	3.655e-05	tolerated(0.05)	benign(0.109)	Benign	2	0.00170794
XPC	c.455C>T	p.A152V	9.464e-06	1.625e-05	tolerated(0.3)	benign(0.02)	Benign	2	0.00170794
NTRK1	c.1358C>T	p.P453L	3.766e-05	3.266e-05	tolerated(0.06)	benign(0.04)	Benign	2	0.00170794
RAD51	c.930C>A	p.T310=	9.415e-06	1.624e-05			Unknown	2	0.00170794
ATM	c.4909+4C>T	-	1.883e-05	4.064e-06			Unknown	2	0.00170794
ATRX	c.4203G>A	p.R1401=	-	-			Unknown	2	0.00170794
BMPR1A	c.230+7A>G	-	2.825e-05	1.625e-05			Unknown	2	0.00170794
EPCAM	c.147T>C	p.T49=	9.415e-05	8.533e-05			Unknown	2	0.00170794
TP53BP1	c.680C>T	p.S227F	6.591e-05	6.573e-05	deleterious(0.02)	possibly_damaging(0.568)	Harmful	2	0.00170794
EXT2	c.1471G>A	p.A491T	5.649e-05	6.502e-05	deleterious(0)	probably_damaging(0.988)	Harmful	2	0.00170794
SDHA	c.6G>C	p.S2=	-	-			Unknown	2	0.00170794
BRCA1	c.5019G>A	p.M1673I	0.01774	0.01825	tolerated(0.17)	benign(0.007)	Benign	2	0.00170794
SDHB	c.709C>T	p.P237S	8.474e-05	8.934e-05	tolerated(0.33)	benign(0.025)	Benign	2	0.00170794
POLE	c.4719C>T	p.L1573=	0.0001036	6.91e-05			Unknown	2	0.00170794
TSC2	c.5252G>A	p.R1751H	9.417e-06	1.225e-05	deleterious(0)	probably_damaging(0.992)	Harmful	2	0.00170794
ATR	c.530G>A	p.R177Q	-	8.237e-06	tolerated_low_confidence(0.07)	benign(0.106)	Benign	2	0.00170794
ENG	c.578C>T	p.T193M	7.57e-05	6.693e-05	tolerated(0.23)	possibly_damaging(0.475)	VUS	2	0.00170794
POLN	c.721G>A	p.V241I	0	0	tolerated(0.27)	benign(0)	Benign	2	0.00170794
BRIP1	c.3274C>T	p.P1092S	9.415e-06	1.22e-05	tolerated_low_confidence(0.73)	benign(0.007)	Benign	2	0.00170794
BRCA2	c.8009C>T	p.S2670L	-	-	deleterious(0)	probably_damaging(1)	Harmful	2	0.00170794
RAD54L	c.2221G>A	p.E741K	9.416e-06	4.089e-06	tolerated(0.17)	benign(0.038)	Benign	2	0.00170794
EGFR	c.2020G>A	p.V674I	1.883e-05	2.872e-05	tolerated(0.25)	benign(0.09)	Benign	2	0.00170794
APC	c.8332G>T	p.A2778S	0.0002071	0.0001594	deleterious(0)	probably_damaging(0.996)	Harmful	2	0.00170794
VHL	c.6C>T	p.P2=	-	-			Unknown	2	0.00170794
BRCA1	c.3359_3363del	p.V1120Dfs*11	-	-			Unknown	2	0.00170794
BUB1B	c.1437A>G	p.K479=	7.532e-05	6.911e-05			Unknown	2	0.00170794
PMS1	c.242A>G	p.H81R	9.415e-06	4.062e-06	deleterious(0.01)	possibly_damaging(0.88)	Harmful	2	0.00170794
PTCH1	c.1347+5C>T	-	1.883e-05	1.218e-05			Unknown	2	0.00170794
TSC2	c.2510C>G	p.A837G	2.825e-05	8.165e-06	deleterious(0)	probably_damaging(0.992)	Harmful	2	0.00170794
FLCN	c.992C>T	p.S331F	6.591e-05	4.873e-05	tolerated(0.72)	benign(0)	Benign	2	0.00170794
PTCH1	c.2049C>T	p.S683=	0.0001412	0.0001137			Unknown	2	0.00170794
SUFU	c.1308C>T	p.T436=	0.0006308	0.0005888			Unknown	2	0.00170794
MLH3	c.2964C>G	p.I988M	2.825e-05	5.282e-05	tolerated(0.14)	benign(0.003)	Benign	2	0.00170794
FANCM	c.2996C>T	p.P999L	0.0003579	0.0002739	deleterious(0)	probably_damaging(0.998)	Harmful	2	0.00170794
POLE	c.5332G>A	p.A1778T	9.415e-06	1.22e-05	tolerated(0.72)	benign(0.003)	Benign	2	0.00170794
MSH6	c.3260C>A	p.P1087H	0.0001506	0.000134	deleterious(0)	probably_damaging(0.954)	Harmful	2	0.00170794
MUS81	c.1450G>A	p.G484R	3.766e-05	4.063e-05	deleterious(0.03)	possibly_damaging(0.677)	Harmful	2	0.00170794
BRCA2	c.1166C>T	p.P389L	6.597e-05	4.066e-05	tolerated(0.21)	benign(0.006)	Benign	2	0.00170794
FANCI	c.2183A>G	p.D728G	4.708e-05	3.25e-05	deleterious(0)	probably_damaging(0.923)	Harmful	2	0.00170794
TSC2	c.4469A>G	p.E1490G	0.0001701	0.0001925	deleterious(0.01)	probably_damaging(0.912)	Harmful	2	0.00170794
RECQL4	c.2928G>C	p.E976D	-	1.226e-05	tolerated(0.24)	benign(0.029)	Benign	2	0.00170794
ENG	c.1533G>A	p.A511=	0.0001318	0.0001505			Unknown	2	0.00170794
POLE	c.700A>G	p.I234V	9.415e-06	1.218e-05	deleterious(0.01)	probably_damaging(0.986)	Harmful	2	0.00170794
CFTR	c.2279C>T	p.T760M	0.0001224	9.49e-05	tolerated(0.29)	benign(0.009)	Benign	2	0.00170794
MLH3	c.2562G>A	p.K854=	9.415e-06	8.129e-06			Unknown	2	0.00170794
WRN	c.2978G>A	p.R993H	-	2.031e-05	deleterious(0.02)	probably_damaging(0.99)	Harmful	2	0.00170794
MLH3	c.2356G>A	p.V786I	0.000113	0.000134	tolerated(0.15)	benign(0.081)	Benign	2	0.00170794
APC	c.1984C>A	p.L662I	5.649e-05	6.515e-05	deleterious(0)	probably_damaging(0.994)	Harmful	2	0.00170794
REV3L	c.9070A>T	p.S3024C	9.415e-06	1.219e-05	deleterious(0.03)	benign(0.312)	VUS	2	0.00170794
GPC3	c.1495A>G	p.M499V	0.000113	6.159e-05	tolerated(0.19)	benign(0.01)	Benign	2	0.00170794
MC1R	c.451C>T	p.R151C	0.04222	0.04441	deleterious(0.02)	probably_damaging(0.996)	Harmful	2	0.00170794
APC	c.3537T>C	p.Y1179=	-	4.071e-06			Unknown	2	0.00170794
ALK	c.1851A>G	p.Q617=	-	-			Unknown	2	0.00170794
RPA1	c.856G>A	p.V286I	0.000339	0.0004101	tolerated(1)	benign(0.038)	Benign	2	0.00170794
AXIN2	c.295C>T	p.L99=	2.825e-05	2.03e-05			Unknown	2	0.00170794
RHBDF2	c.25G>A	p.G9R	7.533e-05	9.486e-05	deleterious_low_confidence(0.05)	benign(0)	Benign	2	0.00170794
PTCH1	c.4128C>T	p.S1376=	0.001472	0.001419			Unknown	2	0.00170794
BRCA2	c.1800T>C	p.Y600=	-	4.222e-06			Unknown	2	0.00170794
ATR	c.1394C>A	p.A465E	3.766e-05	3.656e-05	deleterious_low_confidence(0.01)	benign(0.154)	VUS	2	0.00170794
ACVRL1	c.61+7A>T	-	6.591e-05	8.142e-05			Unknown	2	0.00170794
TSC1	c.1002G>A	p.S334=	3.766e-05	0.0001138			Unknown	2	0.00170794
PTEN	c.234C>T	p.T78=	0.0001036	9.793e-05			Unknown	2	0.00170794
CDH1	c.304G>A	p.A102T	0.0002919	0.0002439	tolerated(0.18)	benign(0.191)	Benign	2	0.00170794
RET	c.2611G>A	p.V871I	0.0001318	8.966e-05	deleterious(0)	possibly_damaging(0.88)	Harmful	2	0.00170794
CFTR	c.1231A>G	p.K411E	1.885e-05	2.472e-05	deleterious_low_confidence(0.02)	benign(0.154)	VUS	2	0.00170794
ENG	c.1447G>A	p.V483I	0.0001695	0.00016	tolerated(1)	benign(0.001)	Benign	2	0.00170794
BUB1	c.1933A>C	p.M645L	9.416e-06	1.22e-05	tolerated(1)	benign(0)	Benign	2	0.00170794
PALLD	c.3297T>C	p.Y1099=	0.006016	0.006613			Unknown	2	0.00170794
FANCM	c.4004A>C	p.K1335T	1.883e-05	1.633e-05	deleterious(0.02)	possibly_damaging(0.738)	Harmful	2	0.00170794
FANCE	c.1204C>T	p.L402F	-	4.061e-06	deleterious(0)	probably_damaging(0.966)	Harmful	2	0.00170794
RET	c.1702G>A	p.G568S	6.591e-05	6.904e-05	tolerated(0.28)	benign(0.028)	Benign	2	0.00170794
SMARCA4	c.1212C>G	p.L404=	0.000113	6.497e-05			Unknown	2	0.00170794
TSC1	c.593A>G	p.N198S	7.532e-05	6.095e-05	tolerated(0.17)	possibly_damaging(0.856)	VUS	2	0.00170794
POLD1	c.957C>T	p.C319=	7.54e-05	7.595e-05			Unknown	2	0.00170794
FANCM	c.5127T>C	p.P1709=	-	8.128e-06			Unknown	2	0.00170794
FANCM	c.1029A>G	p.K343=	3.766e-05	2.845e-05			Unknown	2	0.00170794
RAD52	c.725+8G>A	-	4.726e-05	6.258e-05			Unknown	2	0.00170794
POLQ	c.6462C>T	p.S2154=	0.0001318	0.0001219			Unknown	2	0.00170794
MSH6	c.3818A>G	p.N1273S	9.415e-06	4.067e-06	tolerated(0.08)	possibly_damaging(0.897)	VUS	2	0.00170794
GPC3	c.1354G>A	p.V452M	0.005913	0.006173	deleterious(0.02)	benign(0.149)	VUS	2	0.00170794
CFTR	c.3829A>G	p.I1277V	-	4.069e-06	tolerated(0.8)	benign(0.003)	Benign	2	0.00170794
FANCI	c.463G>A	p.E155K	-	4.062e-06	deleterious(0.04)	possibly_damaging(0.789)	Harmful	2	0.00170794
NTRK1	c.2105G>A	p.R702H	1.883e-05	2.847e-05	deleterious(0.03)	probably_damaging(0.938)	Harmful	2	0.00170794
MLH3	c.1717G>A	p.G573R	1.883e-05	2.844e-05	tolerated(1)	benign(0)	Benign	2	0.00170794
ERCC4	c.1787C>A	p.A596E	3.766e-05	2.873e-05	deleterious(0.03)	probably_damaging(0.999)	Harmful	2	0.00170794
POLQ	c.5242A>C	p.T1748P	3.766e-05	4.067e-05	tolerated(0.26)	benign(0)	Benign	2	0.00170794
EPAS1	c.2080G>A	p.V694M	-	2.032e-05	tolerated(0.14)	benign(0.003)	Benign	2	0.00170794
POLQ	c.1745T>C	p.I582T	0.0001883	0.0001421	deleterious(0)	benign(0.015)	VUS	2	0.00170794
ERCC4	c.389-5C>T	-	0.0002354	0.0001828			Unknown	2	0.00170794
POLG	c.1896C>G	p.A632=	1.883e-05	4.115e-06			Unknown	2	0.00170794
MUTYH	c.790C>T	p.Q264*	-	1.633e-05			Unknown	2	0.00170794
ELAC2	c.2474C>T	p.A825V	-	4.064e-06	tolerated_low_confidence(0.16)	benign(0.012)	Benign	2	0.00170794
ERCC4	c.117C>T	p.L39=	-	-			Unknown	2	0.00170794
APC	c.8266A>G	p.I2756V	8.474e-05	8.133e-05	tolerated(1)	benign(0)	Benign	2	0.00170794
NBN	c.105T>A	p.I35=	4.708e-05	3.656e-05			Unknown	2	0.00170794
TSHR	c.1782C>T	p.F594=	1.883e-05	2.031e-05			Unknown	2	0.00170794
BRCA2	c.7480C>T	p.R2494*	3.766e-05	3.249e-05			Unknown	2	0.00170794
NF1	c.4110+4T>C	-	2.825e-05	2.438e-05			Unknown	2	0.00170794
POLD1	c.2581G>A	p.V861M	5.651e-05	3.689e-05	deleterious(0.04)	benign(0.411)	VUS	2	0.00170794
HMMR	c.1563A>C	p.A521=	1.883e-05	4.088e-05			Unknown	2	0.00170794
EGFR	c.2533G>C	p.V845L	-	-	tolerated(0.11)	possibly_damaging(0.526)	VUS	2	0.00170794
BRCA1	c.1465G>T	p.E489*	-	-			Unknown	2	0.00170794
PRKDC	c.7824C>A	p.T2608=	-	4.132e-06			Unknown	2	0.00170794
BRCA2	c.1744A>C	p.T582P	0.0002354	0.0002242	deleterious(0.01)	probably_damaging(0.967)	Harmful	2	0.00170794
PTCH1	c.87A>G	p.G29=	-	-			Unknown	2	0.00170794
POLQ	c.535A>G	p.R179G	-	8.126e-06	tolerated(1)	benign(0.001)	Benign	2	0.00170794
BRCA1	c.1504_1508del	p.L502Afs*2	1.883e-05	8.135e-06			Unknown	2	0.00170794
ALK	c.4248G>T	p.K1416N	4.708e-05	4.506e-05	tolerated(0.46)	benign(0)	Benign	2	0.00170794
FANCG	c.1157C>G	p.P386R	0.0001413	9.624e-05	tolerated(0.55)	benign(0)	Benign	2	0.00170794
SDHA	c.146A>G	p.D49G	0.0008191	0.0006505	tolerated_low_confidence(0.25)	benign(0)	Benign	2	0.00170794
FANCD2	c.3973C>A	p.L1325M	1.883e-05	2.844e-05	tolerated(0.24)	probably_damaging(0.916)	VUS	2	0.00170794
DIRC2	c.1189G>A	p.V397M	0.000113	0.0001301	deleterious(0.01)	benign(0.176)	VUS	2	0.00170794
BRIP1	c.1688A>G	p.D563G	2.825e-05	4.875e-05	deleterious(0.01)	possibly_damaging(0.841)	Harmful	2	0.00170794
POLE	c.2089C>G	p.P697A	0.0003578	0.0002816	tolerated(0.14)	benign(0.005)	Benign	2	0.00170794
PHOX2B	c.747A>C	p.A249=	-	-			Unknown	2	0.00170794
WRN	c.2537A>C	p.E846A	-	-	deleterious(0)	probably_damaging(1)	Harmful	2	0.00170794
CFTR	c.3564G>A	p.S1188=	0.0001507	0.0001142			Unknown	2	0.00170794
EPAS1	c.393C>T	p.I131=	-	8.122e-06			Unknown	2	0.00170794
HNF1A	c.1699G>A	p.V567I	1.884e-05	2.503e-05	tolerated_low_confidence(0.62)	benign(0)	Benign	2	0.00170794
ERCC5	c.3364C>T	p.P1122S	9.415e-06	1.22e-05	tolerated(1)	benign(0)	Benign	2	0.00170794
NF1	c.888+8G>A	-	1.883e-05	8.253e-06			Unknown	2	0.00170794
POLG	c.3022_3024dup	p.L1008dup	-	1.626e-05			Unknown	2	0.00170794
ALK	c.2210C>T	p.S737L	0.0001318	0.0001142	deleterious(0)	possibly_damaging(0.713)	Harmful	2	0.00170794
TSC2	c.3126G>A	p.P1042=	1.883e-05	1.221e-05			Unknown	2	0.00170794
EPCAM	c.250C>T	p.P84S	4.708e-05	6.497e-05	tolerated(0.05)	probably_damaging(1)	VUS	2	0.00170794
APC	c.1762G>A	p.V588I	3.766e-05	4.472e-05	tolerated(0.08)	benign(0.246)	Benign	2	0.00170794
FLCN	c.1644G>C	p.K548N	1.883e-05	8.121e-06	deleterious(0.03)	benign(0.003)	VUS	2	0.00170794
MRE11A	c.1259A>C	p.K420T	3.766e-05	2.444e-05	tolerated(0.19)	benign(0.383)	Benign	2	0.00170794
BRCA2	c.9117G>A	p.P3039=	-	4.11e-06			Unknown	2	0.00170794
TP53	c.141G>A	p.P47=	8.474e-05	6.905e-05			Unknown	2	0.00170794
MSH6	c.102C>A	p.A34=	0.0001628	0.0001847			Unknown	2	0.00170794
XPC	c.2344G>A	p.V782M	3.779e-05	2.437e-05	deleterious(0)	probably_damaging(0.965)	Harmful	2	0.00170794
EGFR	c.1371T>C	p.S457=	1.883e-05	4.062e-05			Unknown	2	0.00170794
POLH	c.1650T>C	p.S550=	1.883e-05	2.843e-05			Unknown	2	0.00170794
BRCA1	c.4327C>T	p.R1443*	1.883e-05	2.438e-05			Unknown	2	0.00170794
FANCL	c.96+3A>T	-	9.415e-06	4.067e-06			Unknown	2	0.00170794
AKT1	c.703-4G>A	-	1.886e-05	8.994e-06			Unknown	2	0.00170794
BRCA1	c.5398del	p.Q1800Nfs*14	-	-			Unknown	2	0.00170794
SPRED1	c.634G>A	p.V212I	0.0001412	0.0001302	tolerated(0.59)	benign(0)	Benign	2	0.00170794
BRCA1	c.154C>T	p.L52F	0.0001318	0.0001099	deleterious(0)	probably_damaging(1)	Harmful	2	0.00170794
POLE	c.5278G>A	p.V1760M	9.415e-05	8.591e-05	tolerated(0.25)	possibly_damaging(0.505)	VUS	2	0.00170794
BRCA2	c.1218C>G	p.A406=	4.709e-05	4.068e-05			Unknown	2	0.00170794
MLH1	c.42A>C	p.T14=	7.532e-05	9.34e-05			Unknown	2	0.00170794
TSC2	c.225+4G>A	-	9.416e-06	2.44e-05			Unknown	2	0.00170794
POLQ	c.4676C>T	p.S1559L	8.474e-05	0.0001147	deleterious(0.03)	probably_damaging(0.941)	Harmful	2	0.00170794
REV3L	c.2751C>T	p.Y917=	9.415e-05	0.0001139			Unknown	2	0.00170794
BUB1	c.2235G>A	p.K745=	0.0001507	0.0001351			Unknown	2	0.00170794
SMARCE1	c.-45-8del	-	0.001542	0.008684			Unknown	2	0.00170794
BRIP1	c.2244C>G	p.Y748*	-	-			Unknown	2	0.00170794
TP53BP1	c.115G>A	p.D39N	7.532e-05	8.528e-05	deleterious(0)	benign(0.443)	VUS	2	0.00170794
SLX4	c.1740C>T	p.S580=	5.668e-05	5.849e-05			Unknown	2	0.00170794
SLX4	c.2449G>C	p.E817Q	0.0001601	0.0001178	deleterious(0.03)	possibly_damaging(0.903)	Harmful	2	0.00170794
BRCA2	c.5576_5579del	p.I1859Kfs*3	2.825e-05	1.668e-05			Unknown	2	0.00170794
FANCM	c.1702A>G	p.I568V	1.883e-05	1.219e-05	tolerated(0.19)	benign(0.147)	Benign	2	0.00170794
EME1	c.134T>C	p.V45A	-	4.061e-06	deleterious(0)	possibly_damaging(0.54)	Harmful	2	0.00170794
WRN	c.502_503del	p.K168Afs*10	5.65e-05	6.101e-05			Unknown	2	0.00170794
ERCC4	c.2423C>G	p.A808G	9.415e-05	7.317e-05	deleterious(0.01)	benign(0.342)	VUS	2	0.00170794
XPA	c.571C>G	p.L191V	0.0001601	0.0001749	deleterious(0.03)	benign(0.009)	VUS	2	0.00170794
APC	c.2560A>G	p.R854G	-	8.133e-06	tolerated(0.39)	possibly_damaging(0.514)	VUS	2	0.00170794
ATR	c.190A>G	p.T64A	0.0002071	0.0001868	tolerated_low_confidence(0.76)	benign(0)	Benign	2	0.00170794
SDHA	c.451G>A	p.V151I	9.416e-06	-	tolerated_low_confidence(1)	benign(0)	Benign	2	0.00170794
STK11	c.1190C>T	p.A397V	0.0001044	7.005e-05	tolerated(0.1)	benign(0)	Benign	2	0.00170794
POLN	c.178C>T	p.L60F	-	4.111e-06	tolerated(0.17)	possibly_damaging(0.656)	VUS	2	0.00170794
ATRX	c.3646A>G	p.I1216V	2.825e-05	4.612e-05	tolerated(0.78)	benign(0)	Benign	2	0.00170794
FANCM	c.4565A>G	p.D1522G	1.884e-05	1.231e-05	tolerated(0.17)	benign(0.355)	Benign	2	0.00170794
MLH1	c.1128T>C	p.D376=	6.591e-05	6.498e-05			Unknown	2	0.00170794
BMPR1A	c.713G>A	p.R238Q	5.649e-05	9.342e-05	tolerated(0.24)	benign(0.103)	Benign	2	0.00170794
RHBDF2	c.1754A>G	p.H585R	-	2.497e-05	tolerated(0.3)	benign(0)	Benign	2	0.00170794
PTCH1	c.318C>T	p.L106=	0.01349	0.01429			Unknown	2	0.00170794
FANCI	c.2200A>G	p.S734G	2.825e-05	2.844e-05	tolerated(0.78)	benign(0)	Benign	2	0.00170794
DIS3L2	c.2576G>C	p.R859P	1.889e-05	1.651e-05	deleterious(0.03)	benign(0.001)	VUS	2	0.00170794
ERCC3	c.32A>G	p.K11R	2.825e-05	4.109e-05	tolerated(0.17)	benign(0)	Benign	2	0.00170794
BRCA1	c.212+1G>T	p.X71_splice	-	-			Unknown	2	0.00170794
RAD51B	c.883G>A	p.A295T	4.708e-05	5.285e-05	deleterious(0)	possibly_damaging(0.654)	Harmful	2	0.00170794
AXIN2	c.395A>G	p.K132R	-	-	tolerated(0.14)	probably_damaging(0.919)	VUS	2	0.00170794
POLQ	c.196A>T	p.R66*	-	4.069e-06			Unknown	2	0.00170794
RB1	c.173C>T	p.T58I	6.591e-05	3.251e-05	tolerated(0.41)	benign(0)	Benign	2	0.00170794
ALK	c.91T>C	p.S31P	-	-	tolerated_low_confidence(0.08)	benign(0)	Benign	2	0.00170794
WRN	c.2583A>G	p.Q861=	-	4.068e-06			Unknown	2	0.00170794
NCOA4	c.420-7T>C	-	0.0002354	-			Unknown	2	0.00170794
AXIN2	c.1983T>C	p.H661=	-	-			Unknown	2	0.00170794
ATRX	c.3972A>G	p.S1324=	9.417e-06	5.68e-05			Unknown	2	0.00170794
CFTR	c.1813T>C	p.S605P	9.42e-06	4.309e-06	deleterious(0.02)	probably_damaging(0.976)	Harmful	2	0.00170794
CDH1	c.1272C>T	p.V424=	0.0007532	0.0008325			Unknown	2	0.00170794
ALK	c.3260C>T	p.T1087I	3.766e-05	2.844e-05	deleterious(0.04)	benign(0.17)	VUS	2	0.00170794
ATR	c.637C>G	p.L213V	-	8.229e-06	tolerated_low_confidence(0.19)	benign(0.031)	Benign	2	0.00170794
PALLD	c.3359-8A>G	-	1.883e-05	3.255e-05			Unknown	2	0.00170794
BRIP1	c.3238G>A	p.D1080N	-	8.125e-06	tolerated_low_confidence(0.1)	benign(0.044)	Benign	2	0.00170794
GEN1	c.1198A>G	p.I400V	4.708e-05	2.526e-05	tolerated(0.16)	benign(0.003)	Benign	2	0.00170794
MXI1	c.343C>T	p.P115S	-	-	tolerated(0.32)	benign(0.007)	Benign	2	0.00170794
BRCA1	c.5219del	p.V1740Gfs*11	-	-			Unknown	2	0.00170794
BRCA1	c.2286A>T	p.R762S	0.0001224	0.0001342	deleterious(0.01)	possibly_damaging(0.659)	Harmful	2	0.00170794
CDKN1C	c.624_629dup	p.A215_P216dup	-	-			Unknown	2	0.00170794
FANCF	c.182G>T	p.R61L	9.421e-06	1.23e-05	deleterious(0)	benign(0.155)	VUS	2	0.00170794
TERT	c.1662C>G	p.V554=	1.883e-05	3.249e-05			Unknown	2	0.00170794
ATR	c.3637A>G	p.S1213G	1.883e-05	1.628e-05	deleterious(0.01)	probably_damaging(0.999)	Harmful	2	0.00170794
FANCA	c.1359+6T>C	-	-	-			Unknown	2	0.00170794
POLE	c.786C>T	p.D262=	5.649e-05	3.655e-05			Unknown	2	0.00170794
FANCA	c.2395C>T	p.P799S	8.474e-05	5.692e-05	deleterious(0.02)	probably_damaging(0.976)	Harmful	2	0.00170794
POLD1	c.1824G>A	p.P608=	3.766e-05	3.658e-05			Unknown	2	0.00170794
FANCE	c.1333C>T	p.P445S	0.001243	0.001263	tolerated(0.12)	benign(0.033)	Benign	2	0.00170794
EPAS1	c.942G>C	p.G314=	9.415e-06	8.122e-06			Unknown	2	0.00170794
RET	c.1150C>G	p.P384A	2.825e-05	3.658e-05	tolerated(0.54)	benign(0.025)	Benign	2	0.00170794
KIT	c.252G>A	p.T84=	4.708e-05	5.283e-05			Unknown	2	0.00170794
FANCA	c.2151G>T	p.M717I	0.0212	0.02203	tolerated(0.11)	benign(0)	Benign	2	0.00170794
ATRX	c.2697G>A	p.T899=	5.65e-05	6.198e-05			Unknown	2	0.00170794
SMAD4	c.947A>G	p.N316S	6.591e-05	5.281e-05	tolerated(0.65)	benign(0.001)	Benign	2	0.00170794
EGFR	c.1491C>T	p.N497=	3.767e-05	1.228e-05			Unknown	2	0.00170794
PALLD	c.1273A>T	p.T425S	0.004444	0.004622	tolerated(0.07)	possibly_damaging(0.628)	VUS	2	0.00170794
PTCH1	c.4080C>T	p.S1360=	0.003753	0.003979			Unknown	2	0.00170794
RAD54B	c.218C>T	p.T73I	0.0001695	0.0001358	tolerated_low_confidence(0.15)	benign(0)	Benign	2	0.00170794
POT1	c.1007-2_1009del	p.X336_splice	9.418e-06	4.965e-06			Unknown	2	0.00170794
KLLN	c.411A>G	p.P137=	-	5.732e-05			Unknown	2	0.00170794
POLN	c.1504A>G	p.S502G	0.01812	0.02016	tolerated(0.07)	benign(0.007)	Benign	1	0.000853971
ERCC4	c.100G>A	p.V34M	-	-	deleterious(0)	possibly_damaging(0.903)	Harmful	1	0.000853971
BRCA2	c.5199C>T	p.S1733=	0.004229	0.004565			Unknown	1	0.000853971
POLG	c.1790G>A	p.R597Q	-	4.07e-06	tolerated(0.48)	probably_damaging(0.992)	VUS	1	0.000853971
BUB1B	c.2400T>C	p.P800=	-	-			Unknown	1	0.000853971
BRCA1	c.4357+1G>A	p.X1453_splice	9.415e-06	4.066e-06			Unknown	1	0.000853971
TSHR	c.823G>A	p.A275T	9.415e-06	1.624e-05	deleterious(0.03)	probably_damaging(0.997)	Harmful	1	0.000853971
GEN1	c.1629G>C	p.Q543H	-	-	tolerated(0.18)	benign(0.003)	Benign	1	0.000853971
SLX4	c.4383C>T	p.A1461=	3.766e-05	5.409e-05			Unknown	1	0.000853971
SPRED1	c.822T>C	p.D274=	-	-			Unknown	1	0.000853971
POLE	c.1172A>G	p.K391R	-	-	tolerated(0.24)	benign(0.135)	Benign	1	0.000853971
HOXB13	c.11G>T	p.G4V	1.89e-05	1.644e-05	tolerated_low_confidence(0.22)	benign(0)	Benign	1	0.000853971
PDGFRA	c.1092C>T	p.T364=	-	-			Unknown	1	0.000853971
BRCA2	c.7999del	p.S2667Afs*6	-	-			Unknown	1	0.000853971
FANCA	c.3463A>G	p.I1155V	-	-	tolerated(1)	benign(0.024)	Benign	1	0.000853971
BRCA1	c.5098_5102del	p.L1700Yfs*2	-	-			Unknown	1	0.000853971
RET	c.1894G>A	p.E632K	0.0001036	9.5e-05	tolerated(0.27)	benign(0.178)	Benign	1	0.000853971
POLE	c.1008T>C	p.N336=	2.825e-05	1.24e-05			Unknown	1	0.000853971
CDH1	c.1223C>T	p.A408V	0.0002166	0.0001787	deleterious(0)	possibly_damaging(0.72)	Harmful	1	0.000853971
RBBP8	c.1318T>C	p.L440=	0.0001319	0.0001342			Unknown	1	0.000853971
PMS1	c.830G>A	p.R277Q	9.418e-06	2.493e-05	deleterious(0.04)	possibly_damaging(0.581)	Harmful	1	0.000853971
BRCA1	c.2617dup	p.S873Ffs*30	-	-			Unknown	1	0.000853971
PTCH1	c.646A>G	p.M216V	6.591e-05	2.843e-05	tolerated(0.11)	benign(0)	Benign	1	0.000853971
REV3L	c.6151C>G	p.P2051A	-	-	tolerated(0.2)	benign(0.265)	Benign	1	0.000853971
MLH1	c.425G>A	p.C142Y	-	-	deleterious(0)	probably_damaging(0.997)	Harmful	1	0.000853971
MET	c.3563G>A	p.R1188Q	9.464e-06	8.143e-06	deleterious(0)	probably_damaging(0.912)	Harmful	1	0.000853971
BRCA2	c.8917C>G	p.R2973G	9.415e-06	4.095e-06	deleterious(0)	probably_damaging(1)	Harmful	1	0.000853971
FANCM	c.950A>G	p.Q317R	2.825e-05	2.033e-05	tolerated(0.27)	benign(0.005)	Benign	1	0.000853971
TSC2	c.5214C>T	p.S1738=	9.415e-06	4.069e-06			Unknown	1	0.000853971
MRE11A	c.1318G>T	p.A440S	1.883e-05	1.629e-05	tolerated(0.06)	benign(0.107)	Benign	1	0.000853971
ERCC3	c.777A>T	p.E259D	9.415e-06	4.063e-06	tolerated(0.76)	benign(0.001)	Benign	1	0.000853971
BRCA1	c.2155A>T	p.K719*	-	-			Unknown	1	0.000853971
ALK	c.4594A>G	p.N1532D	-	1.22e-05	tolerated(0.89)	benign(0)	Benign	1	0.000853971
CFTR	c.2563G>A	p.V855I	0.000226	0.0001544	tolerated(0.68)	benign(0)	Benign	1	0.000853971
PALB2	c.1462A>G	p.S488G	9.415e-06	8.124e-06	tolerated(0.23)	benign(0.085)	Benign	1	0.000853971
NCOA4	c.871C>T	p.H291Y	9.415e-06	-	tolerated(1)	benign(0.003)	Benign	1	0.000853971
FANCA	c.2871G>T	p.W957C	-	-	deleterious(0)	probably_damaging(0.998)	Harmful	1	0.000853971
MUS81	c.641A>G	p.Q214R	-	4.062e-06	tolerated(0.33)	benign(0.003)	Benign	1	0.000853971
TSHR	c.2252A>G	p.K751R	7.532e-05	9.341e-05	tolerated_low_confidence(0.3)	benign(0.001)	Benign	1	0.000853971
RHBDF2	c.875C>T	p.S292F	0.00822	0.01022	deleterious(0)	possibly_damaging(0.474)	Harmful	1	0.000853971
AKT1	c.1161C>T	p.D387=	-	-			Unknown	1	0.000853971
PMS1	c.1568G>A	p.S523N	-	-	tolerated(0.09)	benign(0.164)	Benign	1	0.000853971
ATM	c.6845A>G	p.N2282S	-	4.066e-06	tolerated(0.18)	benign(0.186)	Benign	1	0.000853971
RAD54B	c.2729C>T	p.T910I	-	8.503e-06	deleterious_low_confidence(0.03)	benign(0)	VUS	1	0.000853971
BARD1	c.1479A>C	p.Q493H	2.825e-05	1.625e-05	deleterious(0.04)	benign(0.074)	VUS	1	0.000853971
TRIM24	c.1082A>G	p.H361R	-	-	deleterious(0.03)	benign(0)	VUS	1	0.000853971
ATM	c.6411C>T	p.D2137=	-	-			Unknown	1	0.000853971
POLD1	c.2598C>T	p.D866=	7.533e-05	5.728e-05			Unknown	1	0.000853971
STK11	c.696C>T	p.S232=	1.893e-05	3.325e-05			Unknown	1	0.000853971
STK11	c.1073A>G	p.D358G	9.441e-06	4.115e-06	deleterious(0.05)	possibly_damaging(0.576)	VUS	1	0.000853971
ERCC5	c.788G>A	p.R263Q	0.0003578	0.000581	tolerated(1)	benign(0)	Benign	1	0.000853971
FANCD2	c.1717A>G	p.I573V	2.825e-05	1.624e-05	deleterious(0.05)	possibly_damaging(0.793)	VUS	1	0.000853971
BARD1	c.927A>G	p.T309=	-	-			Unknown	1	0.000853971
DICER1	c.1827C>T	p.D609=	5.649e-05	3.655e-05			Unknown	1	0.000853971
POLQ	c.7732A>T	p.I2578L	-	-	deleterious(0.01)	benign(0.185)	VUS	1	0.000853971
BRCA1	c.2500G>T	p.G834*	-	-			Unknown	1	0.000853971
POLD1	ENST00000440232.2:c.713C>T	p.T238M	.	-	tolerated(0.34)	benign(0.096)	Benign	1	0.000853971
REV3L	c.6615A>G	p.I2205M	1.883e-05	2.456e-05	tolerated(0.27)	benign(0.009)	Benign	1	0.000853971
RB1	c.609G>T	p.G203=	-	-			Unknown	1	0.000853971
PHOX2B	c.486C>A	p.A162=	-	1.239e-05			Unknown	1	0.000853971
ELAC2	c.2319C>T	p.G773=	5.65e-05	5.341e-05			Unknown	1	0.000853971
BRCA2	c.3863A>G	p.N1288S	9.447e-06	2.078e-05	tolerated(0.65)	benign(0.013)	Benign	1	0.000853971
PHB	c.519G>C	p.L173=	1.883e-05	3.251e-05			Unknown	1	0.000853971
XPC	c.1537A>T	p.M513L	-	-	tolerated(0.23)	benign(0)	Benign	1	0.000853971
AR	c.1707G>A	p.G569=	-	-			Unknown	1	0.000853971
POLN	c.2013C>T	p.H671=	3.766e-05	5.686e-05			Unknown	1	0.000853971
POLE	c.89C>T	p.S30L	-	4.062e-06	deleterious(0.01)	benign(0.086)	VUS	1	0.000853971
HRAS	c.333G>T	p.M111I	-	-	tolerated(0.24)	benign(0.102)	Benign	1	0.000853971
REV3L	c.4309A>G	p.K1437E	-	-	deleterious_low_confidence(0.01)	probably_damaging(0.985)	Harmful	1	0.000853971
WT1	c.604C>T	p.L202=	-	4.157e-06			Unknown	1	0.000853971
PRKDC	c.3520G>C	p.A1174P	1.893e-05	4.063e-06	tolerated(0.18)	possibly_damaging(0.908)	VUS	1	0.000853971
WRN	c.2143G>A	p.V715I	-	-	tolerated(0.44)	benign(0.001)	Benign	1	0.000853971
BRIP1	c.225C>T	p.G75=	0.0001224	0.0001016			Unknown	1	0.000853971
TP53BP1	c.3251G>T	p.G1084V	3.766e-05	2.851e-05	tolerated(0.07)	benign(0.003)	Benign	1	0.000853971
RECQL4	c.2812C>T	p.L938=	-	-			Unknown	1	0.000853971
POLE	c.3115A>T	p.M1039L	-	-	deleterious(0.04)	possibly_damaging(0.812)	Harmful	1	0.000853971
ATM	c.5918+13_5918+19del	-	-	-			Unknown	1	0.000853971
RHBDF2	c.825G>A	p.P275=	-	1.626e-05			Unknown	1	0.000853971
ATM	c.4110-6T>C	-	-	-			Unknown	1	0.000853971
POLG	c.2830G>A	p.E944K	0.0001883	0.0001626	deleterious(0.01)	probably_damaging(0.996)	Harmful	1	0.000853971
TRIM33	c.2477G>C	p.S826T	9.415e-06	1.629e-05	tolerated(0.19)	benign(0)	Benign	1	0.000853971
BRCA1	c.5585G>A	p.S1862N	-	-	deleterious(0)	probably_damaging(0.998)	Harmful	1	0.000853971
PALLD	c.1306A>G	p.T436A	-	-	tolerated(0.83)	benign(0)	Benign	1	0.000853971
ATRX	c.3063G>T	p.E1021D	-	-	tolerated_low_confidence(0.13)	benign(0.315)	Benign	1	0.000853971
CDH1	c.1585A>G	p.T529A	4.708e-05	2.843e-05	tolerated(0.09)	benign(0)	Benign	1	0.000853971
TSC2	c.4569+6C>T	-	9.416e-06	4.071e-06			Unknown	1	0.000853971
BRCA2	c.46A>T	p.K16*	-	-			Unknown	1	0.000853971
MSH2	c.2205C>T	p.I735=	0.001732	0.001486			Unknown	1	0.000853971
MET	c.12C>T	p.P4=	9.464e-05	9.756e-05			Unknown	1	0.000853971
SMARCE1	c.361G>A	p.A121T	-	-	tolerated(0.16)	benign(0.074)	Benign	1	0.000853971
MSH6	c.113C>T	p.P38L	-	-	tolerated(0.26)	benign(0.001)	Benign	1	0.000853971
SLX4	c.594A>G	p.P198=	-	4.061e-06			Unknown	1	0.000853971
MLH3	c.1499C>T	p.P500L	1.883e-05	8.132e-06	tolerated(0.77)	benign(0)	Benign	1	0.000853971
PPM1D	c.57G>A	p.K19=	-	-			Unknown	1	0.000853971
SMAD4	c.625A>C	p.T209P	-	-	tolerated(0.42)	benign(0)	Benign	1	0.000853971
PTCH2	c.90G>A	p.L30=	0.009491	0.01016			Unknown	1	0.000853971
BAP1	c.174C>G	p.S58=	9.416e-06	8.374e-06			Unknown	1	0.000853971
FANCA	c.2602-9_2602-8del	-	0.0008474	0.0007271			Unknown	1	0.000853971
ATM	c.886A>G	p.K296E	-	-	deleterious(0.02)	benign(0.185)	VUS	1	0.000853971
TMEM127	c.345C>G	p.V115=	-	-			Unknown	1	0.000853971
POLH	c.725C>G	p.S242*	9.415e-06	8.122e-06			Unknown	1	0.000853971
BRCA2	c.5987dup	p.R1997Kfs*6	-	-			Unknown	1	0.000853971
DIRC2	c.516G>A	p.T172=	3.766e-05	2.439e-05			Unknown	1	0.000853971
EPAS1	c.2148G>A	p.E716=	2.825e-05	2.032e-05			Unknown	1	0.000853971
RHBDF2	c.1035C>T	p.P345=	6.593e-05	8.98e-05			Unknown	1	0.000853971
BRCA2	c.459A>G	p.P153=	-	8.129e-06			Unknown	1	0.000853971
ATM	c.8762C>T	p.T2921M	2.825e-05	2.031e-05	deleterious(0)	probably_damaging(0.995)	Harmful	1	0.000853971
POLE	c.2400G>T	p.L800=	9.415e-06	8.126e-06			Unknown	1	0.000853971
MSH3	c.2280T>C	p.A760=	-	-			Unknown	1	0.000853971
EGFR	c.1836C>T	p.D612=	2.825e-05	8.124e-06			Unknown	1	0.000853971
DICER1	c.3675C>T	p.Y1225=	4.708e-05	2.843e-05			Unknown	1	0.000853971
EME2	c.904C>T	p.R302W	4.711e-05	3.309e-05	deleterious(0)	probably_damaging(0.998)	Harmful	1	0.000853971
APC	c.3478A>G	p.T1160A	9.416e-06	1.221e-05	tolerated_low_confidence(0.05)	benign(0.197)	Benign	1	0.000853971
EXT2	c.1349G>A	p.R450Q	9.415e-06	2.031e-05	deleterious(0)	probably_damaging(1)	Harmful	1	0.000853971
DDB2	c.1008C>T	p.H336=	-	-			Unknown	1	0.000853971
PMS2	c.643G>A	p.V215I	-	-	tolerated(0.08)	benign(0.094)	Benign	1	0.000853971
NBN	c.511A>G	p.I171V	0.001158	0.001211	deleterious(0.02)	probably_damaging(0.994)	Harmful	1	0.000853971
MSH3	c.1794G>A	p.S598=	0.0008097	0.0009142			Unknown	1	0.000853971
MSH3	c.1211G>A	p.S404N	-	-	tolerated(0.38)	possibly_damaging(0.867)	VUS	1	0.000853971
NF2	c.432C>T	p.Y144=	-	8.128e-06			Unknown	1	0.000853971
NF1	c.888+5G>A	-	7.533e-05	4.938e-05			Unknown	1	0.000853971
DIRC2	c.1431C>T	p.S477=	-	-			Unknown	1	0.000853971
RECQL4	c.2296_2298del	p.X766_splice	-	-			Unknown	1	0.000853971
ERCC3	c.112_113insAAC	p.V38delinsEL	-	8.125e-06			Unknown	1	0.000853971
POLQ	c.1174G>A	p.D392N	-	-	tolerated(0.07)	benign(0.122)	Benign	1	0.000853971
PMS1	c.937G>C	p.D313H	-	-	deleterious(0)	probably_damaging(0.995)	Harmful	1	0.000853971
POT1	c.73G>A	p.V25I	9.416e-06	5.279e-06	tolerated(0.07)	benign(0.02)	Benign	1	0.000853971
AXIN2	c.1445C>T	p.P482L	9.486e-06	1.309e-05	tolerated(0.15)	benign(0.038)	Benign	1	0.000853971
RAD51B	c.59G>A	p.S20N	-	-	tolerated(0.19)	benign(0)	Benign	1	0.000853971
BRCA1	c.3083G>A	p.R1028H	0.0001695	0.0005084	tolerated(0.17)	benign(0.001)	Benign	1	0.000853971
BLM	c.1338A>G	p.T446=	-	-			Unknown	1	0.000853971
EZH2	c.1815C>T	p.S605=	-	4.064e-06			Unknown	1	0.000853971
RAD54B	c.1134A>G	p.L378=	9.416e-06	8.136e-06			Unknown	1	0.000853971
POLN	c.2210C>A	p.S737Y	9.415e-06	4.061e-06	deleterious(0)	probably_damaging(0.997)	Harmful	1	0.000853971
MSH6	c.4001+12_4001+15dup	p.X1334_splice	0.0002072	0.00028			Unknown	1	0.000853971
RAD51C	c.491T>C	p.F164S	-	-	deleterious(0)	probably_damaging(0.998)	Harmful	1	0.000853971
BRCA1	c.4554C>T	p.S1518=	-	-			Unknown	1	0.000853971
ACVRL1	c.1104G>A	p.P368=	0.000113	8.541e-05			Unknown	1	0.000853971
DIS3L2	ENST00000325385.7:c.1875C>T	p.C625=	.	-	.	.	VUS	1	0.000853971
TERT	c.1951-6C>T	-	7.584e-05	7.072e-05			Unknown	1	0.000853971
MSH2	c.1030C>T	p.Q344*	-	-			Unknown	1	0.000853971
PRKDC	c.2100G>T	p.K700N	-	-	deleterious(0)	probably_damaging(0.998)	Harmful	1	0.000853971
POLN	c.2682_2683del	p.S895Afs*64	-	-			Unknown	1	0.000853971
PALLD	c.3234G>T	p.Q1078H	-	-	deleterious(0.03)	probably_damaging(0.987)	Harmful	1	0.000853971
FANCM	c.1358T>C	p.L453S	-	-	deleterious(0)	probably_damaging(0.995)	Harmful	1	0.000853971
TSC2	c.4078G>A	p.E1360K	3.767e-05	2.466e-05	tolerated_low_confidence(0.06)	benign(0.077)	Benign	1	0.000853971
EXT2	c.1270C>A	p.Q424K	9.415e-06	1.219e-05	tolerated(0.07)	possibly_damaging(0.499)	VUS	1	0.000853971
EME2	c.442G>A	p.E148K	-	4.072e-06	tolerated(0.2)	benign(0.049)	Benign	1	0.000853971
BLM	c.1634G>A	p.R545K	-	-	tolerated(0.4)	benign(0.003)	Benign	1	0.000853971
POT1	c.921T>C	p.C307=	-	-			Unknown	1	0.000853971
BRIP1	c.2392C>T	p.R798*	9.416e-05	0.0001734			Unknown	1	0.000853971
MSH2	c.1986G>A	p.Q662=	1.883e-05	2.033e-05			Unknown	1	0.000853971
NBN	c.828A>G	p.T276=	-	-			Unknown	1	0.000853971
FANCI	c.1810A>G	p.M604V	3.766e-05	6.092e-05	tolerated(0.14)	benign(0.084)	Benign	1	0.000853971
BARD1	c.1969C>G	p.P657A	-	-	deleterious(0.04)	probably_damaging(0.914)	Harmful	1	0.000853971
REV3L	c.7221G>C	p.Q2407H	1.883e-05	1.221e-05	tolerated(0.06)	probably_damaging(0.999)	VUS	1	0.000853971
XPC	c.2528G>A	p.R843Q	0.0001515	0.0001181	deleterious(0)	possibly_damaging(0.832)	Harmful	1	0.000853971
PTCH1	c.86G>A	p.G29E	-	-	tolerated_low_confidence(1)	benign(0.179)	Benign	1	0.000853971
ATR	c.3088A>G	p.I1030V	-	-	tolerated(0.26)	benign(0.012)	Benign	1	0.000853971
AXIN2	c.1721G>C	p.R574T	-	4.328e-06	tolerated(0.18)	possibly_damaging(0.543)	VUS	1	0.000853971
CHEK2	c.976-14_976-2del	p.X326_splice	-	-			Unknown	1	0.000853971
BLM	c.3822T>C	p.Y1274=	9.415e-06	8.122e-06			Unknown	1	0.000853971
CEP57	c.739G>A	p.D247N	-	-	tolerated(0.52)	benign(0)	Benign	1	0.000853971
ELAC2	c.2127C>T	p.I709=	-	1.219e-05			Unknown	1	0.000853971
FANCC	c.916G>A	p.D306N	9.415e-06	4.061e-06	tolerated(0.07)	benign(0.164)	Benign	1	0.000853971
FANCF	c.242C>G	p.A81G	-	-	deleterious(0.02)	benign(0.003)	VUS	1	0.000853971
BLM	c.684A>T	p.S228=	-	-			Unknown	1	0.000853971
POLQ	c.5987T>C	p.L1996P	9.416e-06	8.185e-06	deleterious(0)	probably_damaging(0.998)	Harmful	1	0.000853971
AXIN2	c.1349C>T	p.P450L	9.892e-06	6.372e-06	deleterious(0.03)	probably_damaging(1)	Harmful	1	0.000853971
XPC	c.1725C>T	p.D575=	5.658e-05	2.843e-05			Unknown	1	0.000853971
BRIP1	c.929_931del	p.C310del	-	-			Unknown	1	0.000853971
POLH	c.1066C>T	p.R356*	2.825e-05	2.461e-05			Unknown	1	0.000853971
SMARCA4	c.4283C>T	p.T1428I	-	-	tolerated(0.21)	benign(0.051)	Benign	1	0.000853971
BRCA2	c.6149dup	p.N2051Kfs*9	-	-			Unknown	1	0.000853971
NTRK1	c.1341G>A	p.K447=	-	-			Unknown	1	0.000853971
TP53	c.511del	p.E171Rfs*3	-	-			Unknown	1	0.000853971
MSH6	c.3604A>G	p.M1202V	9.416e-06	8.122e-06	deleterious(0.02)	benign(0.003)	VUS	1	0.000853971
XRCC3	c.597dup	p.V200Rfs*23	-	-			Unknown	1	0.000853971
POLD1	c.1573C>T	p.R525W	4.708e-05	2.443e-05	deleterious(0)	possibly_damaging(0.821)	Harmful	1	0.000853971
CDKN1C	c.10G>A	p.A4T	-	-	deleterious(0.01)	benign(0.06)	VUS	1	0.000853971
WRN	c.510A>C	p.K170N	-	-	deleterious(0.03)	probably_damaging(0.925)	Harmful	1	0.000853971
BRCA2	c.476-3C>A	-	6.591e-05	5.285e-05			Unknown	1	0.000853971
TERT	c.2637C>T	p.H879=	-	-			Unknown	1	0.000853971
BARD1	c.1988A>G	p.N663S	-	8.125e-06	deleterious(0)	probably_damaging(0.995)	Harmful	1	0.000853971
PRKDC	c.8001C>T	p.V2667=	0.0001979	0.0003086			Unknown	1	0.000853971
BRCA1	c.5396-1G>A	p.X1799_splice	-	-			Unknown	1	0.000853971
FANCA	c.4186A>G	p.I1396V	-	1.218e-05	tolerated(0.14)	benign(0.017)	Benign	1	0.000853971
TSHR	c.2253G>A	p.K751=	-	-			Unknown	1	0.000853971
SLX4	c.992C>G	p.P331R	-	-	deleterious(0)	probably_damaging(0.999)	Harmful	1	0.000853971
POLD1	c.2589C>T	p.H863=	-	4.096e-06			Unknown	1	0.000853971
PRSS1	c.291C>G	p.P97=	4.708e-05	3.248e-05			Unknown	1	0.000853971
TSC1	c.1751G>C	p.S584T	-	4.066e-06	tolerated(0.06)	probably_damaging(0.998)	VUS	1	0.000853971
BRCA1	c.1506A>G	p.L502=	-	4.067e-06			Unknown	1	0.000853971
POLD1	c.3205G>A	p.V1069I	-	9.053e-06	tolerated(0.08)	possibly_damaging(0.895)	VUS	1	0.000853971
TRIM33	c.2880C>G	p.P960=	1.883e-05	3.67e-05			Unknown	1	0.000853971
FANCI	c.2807T>C	p.V936A	-	-	tolerated(0.53)	benign(0.001)	Benign	1	0.000853971
SDHA	c.1233C>T	p.G411=	3.766e-05	2.437e-05			Unknown	1	0.000853971
EME2	c.1032G>A	p.P344=	6.603e-05	3.843e-05			Unknown	1	0.000853971
PALB2	c.695del	p.G232Vfs*6	-	-			Unknown	1	0.000853971
RAD52	c.866-4G>A	-	2.834e-05	4.072e-05			Unknown	1	0.000853971
PALB2	c.485G>C	p.C162S	-	-	tolerated(1)	benign(0)	Benign	1	0.000853971
MRE11A	c.580G>C	p.V194L	-	-	tolerated(0.32)	benign(0)	Benign	1	0.000853971
ATM	c.2117C>T	p.S706L	1.883e-05	1.631e-05	deleterious(0.03)	benign(0.001)	VUS	1	0.000853971
BRCA2	c.9154C>T	p.R3052W	9.415e-06	1.219e-05	deleterious(0)	probably_damaging(1)	Harmful	1	0.000853971
PPM1D	c.1037G>T	p.C346F	5.649e-05	3.656e-05	tolerated(0.19)	possibly_damaging(0.676)	VUS	1	0.000853971
RAD51C	c.556_558dup	p.K186dup	9.415e-06	1.624e-05			Unknown	1	0.000853971
ATRX	c.4350_4352del	p.E1464del	6.592e-05	5.101e-05			Unknown	1	0.000853971
RAD51D	c.324-3C>A	-	-	-			Unknown	1	0.000853971
CHEK1	c.34G>T	p.V12L	0.0003295	0.0001868	tolerated(0.07)	benign(0.014)	Benign	1	0.000853971
POLQ	c.5360C>T	p.P1787L	-	1.219e-05	tolerated(0.36)	benign(0.058)	Benign	1	0.000853971
AXIN2	c.1092C>T	p.P364=	7.532e-05	9.356e-05			Unknown	1	0.000853971
PMS2	c.1789A>T	p.T597S	0.007617	0.008418	tolerated(0.34)	benign(0.003)	Benign	1	0.000853971
NBN	c.278C>T	p.S93L	0.0007909	0.0006012	deleterious(0)	possibly_damaging(0.461)	Harmful	1	0.000853971
POLQ	c.1114G>T	p.V372L	5.649e-05	6.172e-05	tolerated(0.44)	benign(0.003)	Benign	1	0.000853971
MRE11A	c.465T>C	p.R155=	-	-			Unknown	1	0.000853971
BRCA2	c.5227A>G	p.S1743G	-	-	tolerated(0.26)	benign(0.053)	Benign	1	0.000853971
BAP1	c.175C>A	p.R59=	-	-			Unknown	1	0.000853971
FANCG	c.1268G>A	p.R423H	2.825e-05	2.844e-05	deleterious(0.01)	probably_damaging(0.996)	Harmful	1	0.000853971
POLG	c.147_158del	p.Q52_Q55del	-	-			Unknown	1	0.000853971
NF1	c.7955A>G	p.K2652R	-	-	tolerated(0.15)	possibly_damaging(0.699)	VUS	1	0.000853971
BRCA2	c.8080_8083del	p.I2694Hfs*2	-	-			Unknown	1	0.000853971
CDH1	c.2616G>T	p.L872=	-	-			Unknown	1	0.000853971
BRCA1	c.2800C>T	p.Q934*	-	-			Unknown	1	0.000853971
NCOA4	c.1767T>C	p.P589=	-	-			Unknown	1	0.000853971
ATM	c.6057T>C	p.Y2019=	1.883e-05	8.124e-06			Unknown	1	0.000853971
PRKDC	c.8008A>C	p.T2670P	-	-	deleterious(0.04)	benign(0.007)	VUS	1	0.000853971
NCOA4	c.330+4A>T	-	-	-			Unknown	1	0.000853971
SDHA	c.1055G>A	p.R352Q	5.649e-05	9.343e-05	deleterious_low_confidence(0.02)	possibly_damaging(0.698)	Harmful	1	0.000853971
CDKN1C	c.113A>T	p.D38V	-	-	deleterious(0)	probably_damaging(0.999)	Harmful	1	0.000853971
SLX4	c.2464A>G	p.M822V	9.415e-06	8.122e-06	tolerated(0.75)	benign(0.003)	Benign	1	0.000853971
FANCA	c.3532G>A	p.E1178K	-	-	deleterious(0)	probably_damaging(0.965)	Harmful	1	0.000853971
STK11	c.432G>A	p.P144=	5.671e-05	6.351e-05			Unknown	1	0.000853971
RECQL4	c.2369G>A	p.G790E	-	-	deleterious(0.01)	probably_damaging(1)	Harmful	1	0.000853971
POLQ	c.3228T>A	p.S1076R	9.419e-06	8.162e-06	tolerated_low_confidence(0.54)	benign(0.025)	Benign	1	0.000853971
RAD51C	c.644A>G	p.D215G	-	4.065e-06	deleterious(0.03)	benign(0.363)	VUS	1	0.000853971
FANCD2	c.3959A>G	p.H1320R	1.883e-05	1.219e-05	deleterious(0.03)	possibly_damaging(0.877)	Harmful	1	0.000853971
MUS81	c.1496C>T	p.T499I	-	-	deleterious(0)	benign(0.405)	VUS	1	0.000853971
BRCA2	c.11G>C	p.G4A	1.883e-05	2.031e-05	tolerated(0.05)	possibly_damaging(0.827)	VUS	1	0.000853971
BARD1	c.1472G>T	p.G491V	-	-	deleterious(0)	probably_damaging(1)	Harmful	1	0.000853971
MLH1	c.1504A>G	p.N502D	-	-	deleterious(0.05)	benign(0.027)	Benign	1	0.000853971
DICER1	c.1607G>A	p.R536H	-	-	deleterious(0.03)	probably_damaging(0.997)	Harmful	1	0.000853971
ERCC2	c.2132_2173dup	p.D711_M724dup	-	-			Unknown	1	0.000853971
PRKDC	c.3942T>C	p.T1314=	0.0001136	9.938e-05			Unknown	1	0.000853971
PALLD	c.326_329del	p.Q109Lfs*43	-	4.068e-06			Unknown	1	0.000853971
HMMR	c.1690G>A	p.A564T	7.539e-05	4.096e-05	tolerated(1)	benign(0.007)	Benign	1	0.000853971
TRIM33	c.310G>T	p.A104S	-	-	tolerated_low_confidence(0.82)	benign(0)	Benign	1	0.000853971
VHL	c.128C>G	p.S43C	-	-	tolerated(0.17)	benign(0)	Benign	1	0.000853971
PHB	c.720G>A	p.K240=	9.416e-06	4.135e-06			Unknown	1	0.000853971
POLD1	c.841-5C>T	-	6.69e-05	3.398e-05			Unknown	1	0.000853971
RECQL4	c.2885+1G>A	p.X962_splice	-	-			Unknown	1	0.000853971
KIT	c.2922C>T	p.D974=	-	8.13e-06			Unknown	1	0.000853971
RECQL4	c.3348G>T	p.P1116=	-	-			Unknown	1	0.000853971
POLE	c.3270G>A	p.T1090=	1.883e-05	8.193e-06			Unknown	1	0.000853971
DICER1	c.2716C>T	p.R906C	2.825e-05	1.219e-05	deleterious(0.02)	probably_damaging(0.991)	Harmful	1	0.000853971
XRCC3	c.132C>G	p.P44=	-	-			Unknown	1	0.000853971
BLM	c.2893T>A	p.S965T	-	-	deleterious(0.03)	benign(0.319)	VUS	1	0.000853971
BRCA1	c.2722G>T	p.E908*	-	-			Unknown	1	0.000853971
PRKDC	c.69C>T	p.D23=	-	8.1e-06			Unknown	1	0.000853971
ERCC5	c.1798G>A	p.V600M	-	4.064e-06	deleterious(0.04)	benign(0.021)	VUS	1	0.000853971
SLX4	c.630A>G	p.L210=	0.0002166	0.0002071			Unknown	1	0.000853971
NTRK1	c.1810C>T	p.H604Y	0.04092	0.04169	deleterious(0)	possibly_damaging(0.808)	Harmful	1	0.000853971
RAD54B	c.2610G>A	p.Q870=	-	4.065e-06			Unknown	1	0.000853971
PTCH1	c.1039G>C	p.V347L	-	1.218e-05	tolerated(0.3)	benign(0.005)	Benign	1	0.000853971
RAD50	c.2364C>A	p.C788*	-	-			Unknown	1	0.000853971
POLE	c.266A>C	p.D89A	1.883e-05	2.437e-05	tolerated(0.09)	benign(0.142)	Benign	1	0.000853971
BRCA2	c.5526T>A	p.P1842=	-	-			Unknown	1	0.000853971
SDHA	c.314G>A	p.G105E	-	-	deleterious_low_confidence(0)	probably_damaging(1)	Harmful	1	0.000853971
REV3L	c.1114G>A	p.V372M	-	-	tolerated(0.24)	benign(0.365)	Benign	1	0.000853971
RAD50	c.2593A>G	p.S865G	-	-	tolerated(0.19)	benign(0.021)	Benign	1	0.000853971
MLH3	c.1475T>C	p.L492P	-	-	tolerated(0.1)	benign(0.01)	Benign	1	0.000853971
FANCC	c.915C>T	p.T305=	1.883e-05	8.121e-06			Unknown	1	0.000853971
FANCE	c.1076A>G	p.N359S	-	-	tolerated(1)	benign(0.019)	Benign	1	0.000853971
MSH6	c.3980A>G	p.N1327S	5.65e-05	6.206e-05	tolerated(0.14)	benign(0.001)	Benign	1	0.000853971
SMARCA4	c.2448C>A	p.S816=	-	-			Unknown	1	0.000853971
KLLN	c.368G>T	p.R123L	-	-	tolerated(0.27)	benign(0.067)	Benign	1	0.000853971
NQO2	c.496C>T	p.R166*	9.415e-06	4.064e-06			Unknown	1	0.000853971
NF1	c.2008G>A	p.A670T	-	-	tolerated_low_confidence(0.74)	benign(0.439)	Benign	1	0.000853971
CFTR	c.30C>T	p.S10=	-	8.134e-06			Unknown	1	0.000853971
FANCI	c.1972A>T	p.I658F	4.708e-05	3.657e-05	tolerated(0.06)	benign(0.413)	Benign	1	0.000853971
POLE	c.2408C>T	p.S803L	-	-	deleterious(0)	probably_damaging(0.999)	Harmful	1	0.000853971
RNASEL	c.1694G>A	p.R565H	0.0001789	0.0001685	tolerated(0.5)	benign(0)	Benign	1	0.000853971
EME1	c.1385+8A>G	-	0.01728	0.0159			Unknown	1	0.000853971
POLQ	c.2578C>G	p.R860G	-	-	tolerated(0.06)	benign(0.023)	Benign	1	0.000853971
FANCD2	c.2276C>T	p.P759L	-	-	deleterious(0)	probably_damaging(1)	Harmful	1	0.000853971
POLD1	c.1072C>T	p.R358W	9.789e-06	2.482e-05	deleterious(0)	possibly_damaging(0.892)	Harmful	1	0.000853971
POLG	c.3560G>A	p.R1187Q	1.883e-05	1.624e-05	tolerated(1)	benign(0)	Benign	1	0.000853971
PRSS1	c.455C>G	p.A152G	1.883e-05	1.218e-05	tolerated(0.46)	benign(0)	Benign	1	0.000853971
CDK12	c.335G>A	p.R112H	-	4.064e-06	tolerated_low_confidence(0.07)	probably_damaging(0.984)	VUS	1	0.000853971
SDHB	c.110C>T	p.P37L	-	-	deleterious(0)	benign(0.398)	VUS	1	0.000853971
RAD52	c.1187G>A	p.R396H	1.892e-05	2.031e-05	tolerated(1)	benign(0)	Benign	1	0.000853971
PALB2	c.2067G>A	p.S689=	5.649e-05	3.249e-05			Unknown	1	0.000853971
MITF	c.446A>G	p.N149S	-	-	tolerated(0.45)	benign(0.406)	Benign	1	0.000853971
MSH6	c.1501C>T	p.H501Y	2.825e-05	3.253e-05	deleterious(0.04)	benign(0.166)	VUS	1	0.000853971
POLH	c.1115T>C	p.V372A	-	-	tolerated(0.07)	benign(0.165)	Benign	1	0.000853971
PALB2	c.437G>A	p.R146K	-	-	tolerated(0.39)	benign(0.011)	Benign	1	0.000853971
RECQL4	c.2100C>T	p.L700=	1.019e-05	1.269e-05			Unknown	1	0.000853971
BRCA1	c.1036C>T	p.P346S	0.0002448	0.0001585	tolerated(0.71)	benign(0.04)	Benign	1	0.000853971
RECQL4	c.2511G>A	p.T837=	9.47e-05	0.0001173			Unknown	1	0.000853971
PALB2	c.3350+5G>A	-	-	8.124e-06			Unknown	1	0.000853971
TP53BP1	c.2760C>T	p.I920=	-	-			Unknown	1	0.000853971
NF1	c.1466A>G	p.Y489C	9.416e-06	1.221e-05	tolerated(0.08)	benign(0.007)	Benign	1	0.000853971
SLX4	c.1193G>A	p.R398Q	9.415e-06	2.031e-05	deleterious(0.01)	possibly_damaging(0.757)	Harmful	1	0.000853971
DICER1	c.480A>G	p.K160=	9.415e-06	4.071e-06			Unknown	1	0.000853971
BRCA1	c.3747C>T	p.T1249=	4.708e-05	2.846e-05			Unknown	1	0.000853971
RHBDF2	c.146C>G	p.P49R	4.708e-05	2.048e-05	deleterious_low_confidence(0.02)	possibly_damaging(0.878)	Harmful	1	0.000853971
EMSY	c.216C>T	p.N72=	8.474e-05	8.972e-05			Unknown	1	0.000853971
RPA1	c.1422G>A	p.E474=	1.883e-05	2.843e-05			Unknown	1	0.000853971
MLH1	c.1430C>T	p.S477F	-	-	tolerated(0.1)	benign(0.011)	Benign	1	0.000853971
POLN	c.1249-21_1249del	p.X417_splice	-	-			Unknown	1	0.000853971
EXT1	c.1408G>A	p.A470T	-	4.077e-06	tolerated(0.58)	benign(0.028)	Benign	1	0.000853971
ATR	c.6045C>T	p.N2015=	-	-			Unknown	1	0.000853971
POLQ	c.4146dup	p.G1383Rfs*4	-	-			Unknown	1	0.000853971
MITF	c.354G>C	p.K118N	-	-	deleterious(0)	possibly_damaging(0.885)	Harmful	1	0.000853971
RHBDF2	c.1443G>A	p.G481=	-	4.062e-06			Unknown	1	0.000853971
CTNNB1	c.1500A>G	p.P500=	-	-			Unknown	1	0.000853971
EGFR	c.1621C>T	p.L541F	-	8.122e-06	tolerated(0.2)	benign(0)	Benign	1	0.000853971
FANCM	c.5577T>C	p.N1859=	0.001055	0.0008488			Unknown	1	0.000853971
FANCG	c.1718G>C	p.R573T	6.591e-05	5.282e-05	deleterious(0)	benign(0.027)	VUS	1	0.000853971
RECQL4	c.3526G>A	p.V1176M	-	4.082e-06	deleterious(0)	possibly_damaging(0.88)	Harmful	1	0.000853971
TP53BP1	c.2196C>A	p.S732=	-	-			Unknown	1	0.000853971
POT1	c.1714G>A	p.E572K	-	-	deleterious(0.01)	probably_damaging(0.994)	Harmful	1	0.000853971
HNF1B	c.915G>A	p.K305=	-	-			Unknown	1	0.000853971
PRKDC	c.6281C>T	p.A2094V	3.772e-05	3.254e-05	deleterious(0.02)	benign(0.021)	VUS	1	0.000853971
POLH	c.700C>T	p.R234C	5.649e-05	3.655e-05	deleterious(0)	possibly_damaging(0.783)	Harmful	1	0.000853971
PALLD	c.153C>T	p.A51=	-	-			Unknown	1	0.000853971
MSR1	c.178G>A	p.V60M	2.825e-05	2.031e-05	tolerated(0.06)	possibly_damaging(0.452)	Benign	1	0.000853971
XRCC3	c.433G>A	p.A145T	8.849e-05	8.35e-05	tolerated(0.06)	benign(0.228)	Benign	1	0.000853971
FANCD2	c.10A>G	p.K4E	-	-	deleterious(0)	probably_damaging(0.998)	Harmful	1	0.000853971
BRCA2	c.3258A>G	p.I1086M	-	-	deleterious(0.04)	benign(0.382)	VUS	1	0.000853971
RECQL4	c.3061C>T	p.R1021W	4.724e-05	2.862e-05	tolerated(0.2)	benign(0.001)	Benign	1	0.000853971
RAD51	c.225G>T	p.L75=	-	-			Unknown	1	0.000853971
XPC	c.346G>A	p.A116T	9.465e-06	4.064e-06	tolerated_low_confidence(0.12)	benign(0.086)	Benign	1	0.000853971
BUB1B	c.2163A>G	p.P721=	3.766e-05	2.03e-05			Unknown	1	0.000853971
NTHL1	c.913C>T	p.L305F	9.426e-06	2.096e-05	deleterious(0.04)	benign(0.087)	VUS	1	0.000853971
AXIN2	c.2499C>A	p.G833=	6.591e-05	4.467e-05			Unknown	1	0.000853971
BRCA1	c.5574G>T	p.W1858C	-	-	deleterious(0)	probably_damaging(1)	Harmful	1	0.000853971
POLH	c.1166G>A	p.R389H	6.591e-05	4.881e-05	tolerated(0.15)	benign(0.005)	Benign	1	0.000853971
FH	c.1099A>G	p.I367V	-	-	deleterious(0)	probably_damaging(0.996)	Harmful	1	0.000853971
MSH6	c.3529C>G	p.L1177V	1.883e-05	1.22e-05	deleterious(0)	probably_damaging(0.934)	Harmful	1	0.000853971
TSC2	c.4355C>T	p.S1452L	6.61e-05	3.792e-05	tolerated(0.07)	probably_damaging(0.945)	VUS	1	0.000853971
APC	c.6034T>C	p.F2012L	-	-	tolerated(0.07)	probably_damaging(0.992)	VUS	1	0.000853971
ERCC2	c.1891C>T	p.R631C	2.825e-05	1.625e-05	deleterious(0)	probably_damaging(0.985)	Harmful	1	0.000853971
TERT	c.2355G>A	p.P785=	3.779e-05	4.094e-05			Unknown	1	0.000853971
RAD50	c.1034A>T	p.E345V	-	-	deleterious(0.01)	benign(0.333)	VUS	1	0.000853971
POLQ	c.375A>G	p.A125=	-	-			Unknown	1	0.000853971
GEN1	c.2633T>C	p.L878P	2.825e-05	1.658e-05	tolerated(0.19)	benign(0.003)	Benign	1	0.000853971
MXI1	c.314C>T	p.P105L	-	-	deleterious(0.01)	possibly_damaging(0.585)	Harmful	1	0.000853971
RAD50	c.337A>G	p.T113A	-	4.067e-06	deleterious(0.01)	benign(0.242)	VUS	1	0.000853971
TP53	c.713G>A	p.C238Y	9.415e-06	8.122e-06	deleterious(0)	probably_damaging(1)	Harmful	1	0.000853971
GPC3	c.38C>T	p.A13V	-	7.952e-06	tolerated_low_confidence(0.69)	benign(0.019)	Benign	1	0.000853971
EXT1	c.1284+7G>A	-	-	-			Unknown	1	0.000853971
TRIM33	c.412G>A	p.A138T	-	-	deleterious_low_confidence(0.05)	benign(0.006)	Benign	1	0.000853971
XPC	c.2432A>G	p.Y811C	-	-	deleterious(0)	possibly_damaging(0.667)	Harmful	1	0.000853971
RAD52	c.527del	p.N176Ifs*13	-	-			Unknown	1	0.000853971
FANCL	c.928A>G	p.M310V	3.767e-05	5.302e-05	tolerated(0.75)	benign(0.01)	Benign	1	0.000853971
DICER1	c.827A>C	p.E276A	-	-	tolerated(0.25)	benign(0.069)	Benign	1	0.000853971
HMMR	c.118A>G	p.K40E	9.424e-06	6.048e-06	deleterious(0.01)	possibly_damaging(0.693)	Harmful	1	0.000853971
NF1	c.5026G>T	p.A1676S	-	-	deleterious(0.02)	benign(0.052)	VUS	1	0.000853971
REV3L	c.5261G>A	p.R1754Q	9.415e-06	1.626e-05	tolerated_low_confidence(0.31)	benign(0.001)	Benign	1	0.000853971
BRCA2	c.5616_5620del	p.K1872Nfs*2	1.883e-05	4.126e-06			Unknown	1	0.000853971
RECQL4	c.3072A>G	p.T1024=	2.834e-05	5.714e-05			Unknown	1	0.000853971
POLE	c.1836C>T	p.D612=	4.708e-05	4.062e-05			Unknown	1	0.000853971
PALB2	c.2533C>T	p.P845S	-	4.065e-06	deleterious(0.04)	possibly_damaging(0.606)	Harmful	1	0.000853971
ATR	c.6072A>G	p.K2024=	-	-			Unknown	1	0.000853971
POLB	c.776T>C	p.L259S	0.0002542	0.000249	deleterious(0)	probably_damaging(0.998)	Harmful	1	0.000853971
FANCI	c.288+7T>C	-	9.415e-06	4.062e-06			Unknown	1	0.000853971
POLG	c.2977C>T	p.R993C	0	0	deleterious(0)	probably_damaging(0.998)	Harmful	1	0.000853971
MUS81	c.747-7C>T	-	9.415e-06	4.079e-06			Unknown	1	0.000853971
DICER1	c.1871G>A	p.R624Q	-	8.123e-06	tolerated(0.14)	probably_damaging(0.942)	VUS	1	0.000853971
REV3L	c.1454+5T>C	-	-	-			Unknown	1	0.000853971
AXIN2	c.1985T>C	p.L662P	0.001036	0.001064	tolerated(0.77)	benign(0.012)	Benign	1	0.000853971
BLM	c.2630A>G	p.D877G	-	4.064e-06	deleterious(0)	benign(0.217)	VUS	1	0.000853971
MC1R	c.852C>A	p.L284=	-	-			Unknown	1	0.000853971
PDGFRA	c.1741C>T	p.P581S	-	-	deleterious(0)	probably_damaging(0.997)	Harmful	1	0.000853971
ELAC2	c.445G>A	p.E149K	2.825e-05	2.843e-05	tolerated(0.43)	benign(0.011)	Benign	1	0.000853971
RBBP8	c.984T>C	p.P328=	6.592e-05	4.063e-05			Unknown	1	0.000853971
SLX4	c.1672C>T	p.R558W	6.608e-05	7.585e-05	tolerated(0.13)	benign(0.003)	Benign	1	0.000853971
FANCM	c.4167A>G	p.E1389=	-	-			Unknown	1	0.000853971
BRCA1	c.1616C>G	p.T539R	-	-	tolerated(0.11)	benign(0.05)	Benign	1	0.000853971
POT1	c.1130C>G	p.S377C	2.825e-05	4.276e-05	tolerated(0.16)	probably_damaging(0.998)	VUS	1	0.000853971
FANCD2	c.3047T>A	p.V1016D	1.883e-05	2.843e-05	deleterious(0)	possibly_damaging(0.653)	Harmful	1	0.000853971
MUS81	c.874C>T	p.Q292*	-	-			Unknown	1	0.000853971
DIRC2	ENST00000261038.5:c.1056_1058delCCT	p.L353del	.	-	.	.	VUS	1	0.000853971
BRCA2	c.1813dup	p.I605Nfs*11	3.767e-05	1.319e-05			Unknown	1	0.000853971
PALB2	c.337C>G	p.P113A	-	-	tolerated(0.14)	benign(0.085)	Benign	1	0.000853971
CFTR	c.3200C>T	p.A1067V	1.884e-05	1.221e-05	deleterious(0)	probably_damaging(1)	Harmful	1	0.000853971
PDGFRA	c.827C>T	p.T276M	8.474e-05	8.128e-05	tolerated(0.24)	benign(0.025)	Benign	1	0.000853971
RBBP8	c.617T>C	p.V206A	1.883e-05	1.223e-05	tolerated(0.35)	benign(0)	Benign	1	0.000853971
PMS2	c.367T>A	p.S123T	-	-	tolerated(0.59)	benign(0.436)	Benign	1	0.000853971
BRCA2	c.8954-8C>T	-	-	-			Unknown	1	0.000853971
CDKN1B	c.365C>T	p.P122L	2.827e-05	2.875e-05	tolerated(0.05)	benign(0)	Benign	1	0.000853971
ATM	c.2119T>C	p.S707P	0.007466	0.008027	tolerated(0.32)	benign(0)	Benign	1	0.000853971
APC	c.3173A>G	p.D1058G	0.000499	0.0006113	deleterious_low_confidence(0)	benign(0.141)	VUS	1	0.000853971
PMS2	c.556C>T	p.Q186*	-	-			Unknown	1	0.000853971
ATR	c.4875C>T	p.D1625=	-	-			Unknown	1	0.000853971
NQO2	c.647G>A	p.W216*	4.708e-05	4.068e-05			Unknown	1	0.000853971
PALB2	c.2207C>A	p.A736D	-	-	deleterious(0.04)	probably_damaging(0.952)	Harmful	1	0.000853971
BLM	c.1235C>T	p.T412M	9.415e-06	2.043e-05	deleterious(0.02)	benign(0.374)	VUS	1	0.000853971
FANCF	c.190A>T	p.N64Y	-	-	deleterious(0.04)	possibly_damaging(0.596)	Harmful	1	0.000853971
REV3L	c.841A>G	p.M281V	1.883e-05	1.625e-05	deleterious(0.04)	benign(0)	VUS	1	0.000853971
GALNT12	c.825G>A	p.Q275=	-	-			Unknown	1	0.000853971
PRKDC	c.6055G>A	p.D2019N	-	-	tolerated(0.08)	benign(0.084)	Benign	1	0.000853971
POLQ	c.5188G>A	p.D1730N	4.708e-05	5.291e-05	tolerated(0.23)	benign(0.118)	Benign	1	0.000853971
PRKDC	c.9158A>C	p.Q3053P	-	8.136e-06	tolerated(0.23)	benign(0.377)	Benign	1	0.000853971
PHOX2B	c.56C>G	p.A19G	-	4.067e-06	deleterious(0.03)	benign(0.438)	VUS	1	0.000853971
TERT	c.297C>T	p.F99=	3.84e-05	5.265e-05			Unknown	1	0.000853971
EMSY	c.557C>G	p.T186S	-	-	tolerated(0.17)	benign(0.098)	Benign	1	0.000853971
TMEM127	c.172G>A	p.G58R	-	-	deleterious(0.01)	possibly_damaging(0.845)	Harmful	1	0.000853971
RHBDF2	c.2539G>A	p.E847K	-	2.549e-05	tolerated(0.08)	benign(0.27)	Benign	1	0.000853971
POLN	c.1820C>T	p.P607L	2.825e-05	1.218e-05	deleterious(0)	probably_damaging(0.987)	Harmful	1	0.000853971
ATM	c.192A>G	p.L64=	6.593e-05	6.175e-05			Unknown	1	0.000853971
SMARCA4	c.417G>A	p.P139=	5.649e-05	6.989e-05			Unknown	1	0.000853971
EXT1	c.2179G>A	p.V727I	1.883e-05	4.47e-05	tolerated(0.09)	possibly_damaging(0.889)	VUS	1	0.000853971
POLG	c.2028G>A	p.A676=	0.0004049	0.0002928			Unknown	1	0.000853971
GALNT12	c.1213-3C>T	-	1.883e-05	8.122e-06			Unknown	1	0.000853971
XPC	c.2174G>A	p.R725Q	3.784e-05	3.249e-05	tolerated(0.7)	benign(0.015)	Benign	1	0.000853971
REV3L	c.9218G>A	p.R3073Q	1.883e-05	1.625e-05	tolerated(0.14)	possibly_damaging(0.667)	VUS	1	0.000853971
ELAC2	c.520G>A	p.E174K	0.0001789	0.0001746	tolerated(1)	benign(0)	Benign	1	0.000853971
ATM	c.4050G>A	p.T1350=	1.883e-05	2.053e-05			Unknown	1	0.000853971
ERCC5	c.54C>T	p.S18=	-	-			Unknown	1	0.000853971
REV3L	c.5242T>C	p.F1748L	-	-	tolerated_low_confidence(1)	benign(0)	Benign	1	0.000853971
ERCC2	c.2191-8C>A	-	-	4.137e-06			Unknown	1	0.000853971
ALK	c.1042G>A	p.A348T	2.825e-05	3.66e-05	tolerated(0.15)	possibly_damaging(0.5)	VUS	1	0.000853971
POLE	c.2148G>A	p.A716=	3.767e-05	3.855e-05			Unknown	1	0.000853971
EGFR	c.1774G>A	p.V592I	0.0003107	0.0003006	tolerated(0.05)	benign(0.274)	Benign	1	0.000853971
PMS2	c.2265C>T	p.I755=	0.000104	9.824e-05			Unknown	1	0.000853971
BUB1B	c.1515C>T	p.A505=	1.883e-05	2.852e-05			Unknown	1	0.000853971
MDH2	c.951G>A	p.S317=	3.766e-05	2.034e-05			Unknown	1	0.000853971
PRKDC	c.1212C>T	p.D404=	0.0001607	0.0002478			Unknown	1	0.000853971
STK11	c.609G>T	p.P203=	-	-			Unknown	1	0.000853971
SDHA	c.1346C>T	p.A449V	0.0001036	4.07e-06	deleterious_low_confidence(0.01)	possibly_damaging(0.52)	Harmful	1	0.000853971
PALB2	c.3257G>A	p.R1086Q	8.474e-05	6.091e-05	deleterious(0)	benign(0)	VUS	1	0.000853971
RAD50	c.2165_2166insT	p.K722Nfs*6	9.415e-06	1.633e-05			Unknown	1	0.000853971
ATM	c.6067G>A	p.G2023R	0.001525	0.00147	deleterious(0)	probably_damaging(0.972)	Harmful	1	0.000853971
EPAS1	c.2481C>G	p.L827=	9.415e-06	1.625e-05			Unknown	1	0.000853971
PTCH2	c.403C>T	p.H135Y	-	-	deleterious(0)	probably_damaging(0.998)	Harmful	1	0.000853971
FANCG	c.399G>A	p.P133=	9.415e-05	6.505e-05			Unknown	1	0.000853971
ATM	c.3602_3603del	p.F1201Wfs*3	-	-			Unknown	1	0.000853971
BRCA1	c.2158G>T	p.E720*	-	-			Unknown	1	0.000853971
ERCC2	c.192G>A	p.P64=	-	8.122e-06			Unknown	1	0.000853971
[truncated: 3,658 more rows]
