# Supplementary material for: Mutation characteristics of cancer susceptibility genes in Chinese ovarian cancer patients
Source: Front Oncol. 2024 May 16;14:1395818. doi: 10.3389/fonc.2024.1395818 (PMC11137316; doi:10.3389/fonc.2024.1395818)
Supplement: Supplementary file 9 [file Table_4.xlsx]

## Sheet: Sheet1
Table S4 The population frequency of genes
Sample	Ovary_number	Ovary_ratio
PRKDC	612	0.52263
POLE	440	0.375747
PTCH1	425	0.362938
PRSS1	416	0.355252
SLX4	414	0.353544
BRCA2	406	0.346712
FANCI	358	0.305722
TP53BP1	349	0.298036
FANCD2	348	0.297182
BRCA1	342	0.292058
ERCC5	336	0.286934
REV3L	300	0.256191
GEN1	300	0.256191
TSC2	294	0.251067
RET	293	0.250213
MUTYH	288	0.245944
ATM	254	0.216909
POLQ	253	0.216055
RECQL4	249	0.212639
ALK	248	0.211785
CFTR	243	0.207515
MSH2	237	0.202391
FANCM	223	0.190436
MC1R	221	0.188728
FH	218	0.186166
FANCA	208	0.177626
POLG	205	0.175064
NF1	202	0.172502
BARD1	198	0.169086
WRN	197	0.168232
MLH3	197	0.168232
POLD1	195	0.166524
MLH1	195	0.166524
ATRX	192	0.163962
MSH6	190	0.162254
ATR	184	0.157131
MSH3	177	0.151153
KIF1B	177	0.151153
SDHA	169	0.144321
KIT	169	0.144321
NCOA4	165	0.140905
BLM	161	0.137489
BAP1	160	0.136635
BUB1	154	0.131512
POLH	151	0.12895
PALLD	146	0.12468
PMS2	143	0.122118
XRCC3	142	0.121264
BRIP1	141	0.12041
ENG	138	0.117848
RAD51C	133	0.113578
NQO2	129	0.110162
APC	126	0.1076
RAD54B	126	0.1076
EXT2	125	0.106746
RAD54L	121	0.10333
FANCE	119	0.101623
RAD52	117	0.0999146
AXIN2	117	0.0999146
CDKN1C	116	0.0990606
PTCH2	115	0.0982067
EME1	113	0.0964987
SMARCA4	111	0.0947908
TSC1	110	0.0939368
MET	109	0.0930828
PALB2	108	0.0922289
DIS3L2	108	0.0922289
ACVRL1	106	0.0905209
FANCC	106	0.0905209
CDKN1B	104	0.088813
STK11	104	0.088813
NBN	103	0.087959
XPC	101	0.0862511
POLN	101	0.0862511
ELAC2	99	0.0845431
MEN1	93	0.0794193
TERT	92	0.0785653
EPCAM	91	0.0777114
FAM175A	91	0.0777114
RPA1	90	0.0768574
MUS81	90	0.0768574
RHBDF2	88	0.0751494
BUB1B	88	0.0751494
POT1	86	0.0734415
FANCF	84	0.0717336
TRIM33	83	0.0708796
VHL	82	0.0700256
TRIM24	82	0.0700256
EPAS1	81	0.0691716
EME2	77	0.0657558
POLB	75	0.0640478
CDH1	74	0.0631939
EGFR	73	0.0623399
ERCC2	73	0.0623399
EXT1	71	0.0606319
MSR1	70	0.059778
NTRK1	68	0.05807
RNASEL	67	0.0572161
CEP57	67	0.0572161
DICER1	67	0.0572161
RBBP8	63	0.0538002
TSHR	63	0.0538002
FANCG	63	0.0538002
ERCC4	63	0.0538002
AR	63	0.0538002
RAD51D	62	0.0529462
EMSY	62	0.0529462
GALNT12	60	0.0512383
HMMR	59	0.0503843
RAD50	58	0.0495303
DIRC2	55	0.0469684
PMS1	54	0.0461144
PPM1D	54	0.0461144
HNF1A	53	0.0452605
RPS20	52	0.0444065
GPC3	51	0.0435525
PHOX2B	48	0.0409906
CDK12	46	0.0392827
SHFM1	46	0.0392827
MITF	45	0.0384287
MRE11A	43	0.0367208
ERCC3	40	0.0341588
CHEK2	39	0.0333049
BMPR1A	38	0.0324509
PDGFRA	37	0.0315969
FANCL	37	0.0315969
RAD51	36	0.030743
TP53	35	0.029889
SUFU	34	0.029035
RB1	33	0.028181
KLLN	31	0.0264731
SDHAF2	31	0.0264731
TMEM127	31	0.0264731
FLCN	30	0.0256191
CTNNB1	28	0.0239112
NF2	27	0.0230572
CHEK1	27	0.0230572
CDK4	26	0.0222032
NTHL1	25	0.0213493
WT1	23	0.0196413
SMARCE1	22	0.0187874
MDH2	22	0.0187874
SLX1A	21	0.0179334
CYLD	21	0.0179334
DMC1	20	0.0170794
EZH2	20	0.0170794
SPINK1	18	0.0153715
HRAS	17	0.0145175
HOXB13	17	0.0145175
SMARCB1	17	0.0145175
HNF1B	16	0.0136635
XRCC2	16	0.0136635
AKT1	16	0.0136635
CDK6	16	0.0136635
XPA	15	0.0128096
DDB2	15	0.0128096
SPRED1	14	0.0119556
MXI1	13	0.0111016
SDHC	11	0.00939368
CDC73	10	0.00853971
RAD51B	10	0.00853971
PHB	10	0.00853971
CDKN2A	10	0.00853971
PPP2R2A	9	0.00768574
SMAD4	8	0.00683177
PTEN	8	0.00683177
SDHB	7	0.0059778
SDHD	5	0.00426985
SLX1B	4	0.00341588
GREM1	2	0.00170794
MAX	1	0.000853971
