# Supplementary material for: Mutation characteristics of cancer susceptibility genes in Chinese ovarian cancer patients
Source: Front Oncol. 2024 May 16;14:1395818. doi: 10.3389/fonc.2024.1395818 (PMC11137316; doi:10.3389/fonc.2024.1395818)
Supplement: Supplementary file 10 [file Table_5.xlsx]

## Sheet: Sheet1
Table S5 Total detection rate of deleterious mutations in NCCN ovarian cancer screening genes in different populations
	Race or ethnic group	With pathogenic variant (%)
Cohort A	American(n=1915)	18.1
Cohort B	American(n=1853)	18.81
Cohort C	Chinese(n=449)	27.2
Cohort D	Chinese(n=1331)	>22.4
Cohort E	Chinese(n=916)	>17.00
Cohort F	Chinese(n=826)	>28.40
Our Cohort	Chinese(n=1976)	28.35
